# Supplementary material for: A High-Fat Diet Modifies Brain Neurotransmitter Profile and Hippocampal Proteome and Morphology in an IUGR Pig Model
Source: MDPI journal article supplement (doi:10.3390/nu14163440), 2022-08-22
Supplement: s1 [file s1]

# Supplementary Materials

**Figure S1.** Complete Voronoi diagram obtained with Reactome showing the main pathways regulated by an HFD in NBW and LBW groups.

Complete Voronoi figure and individual images shown in Figure 6 with enlarged letter size:

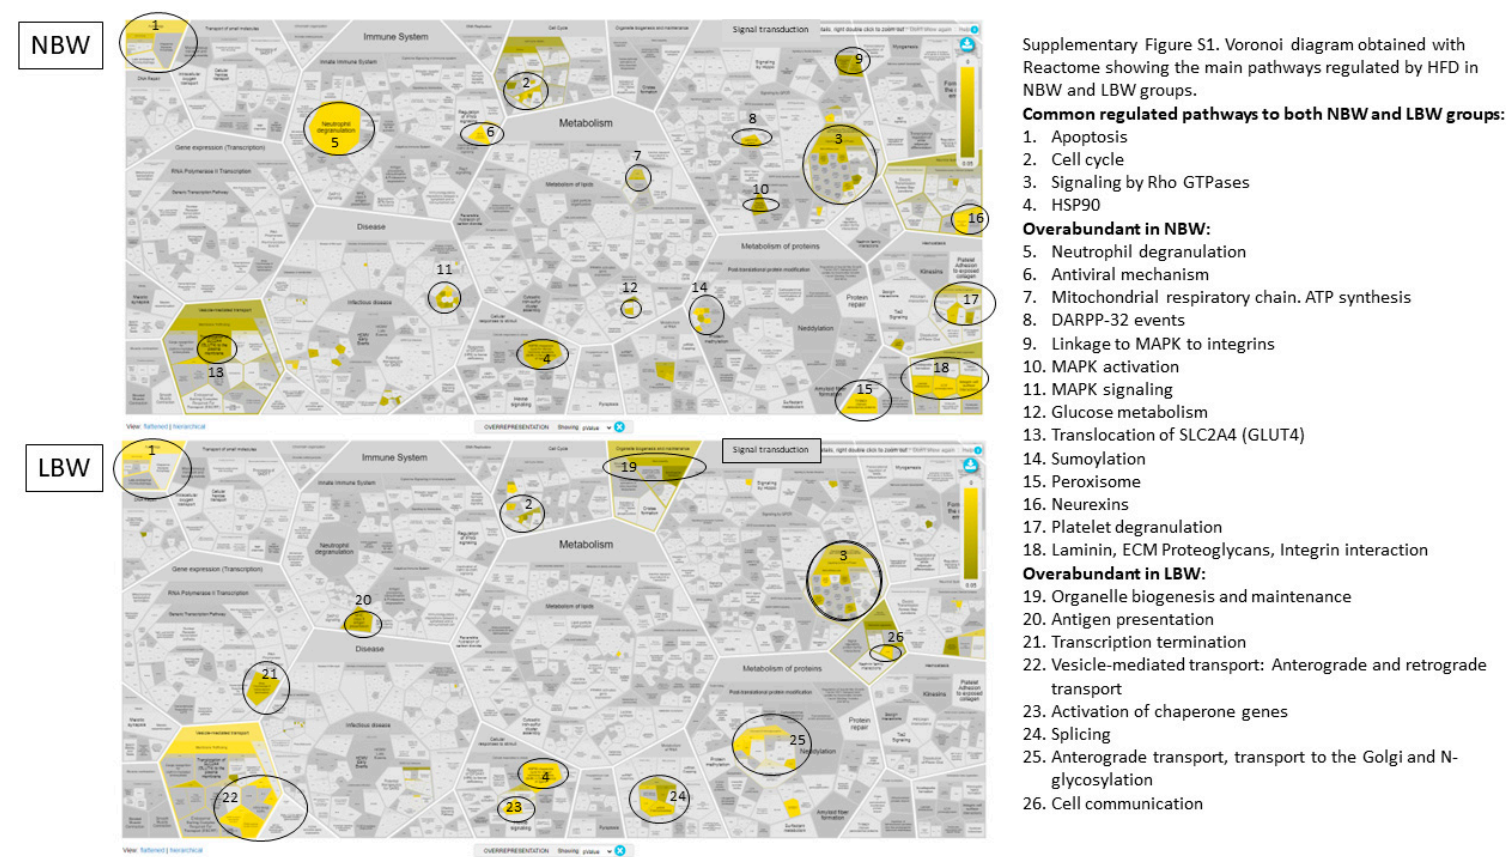



## Vesicle-mediated transport

NBW

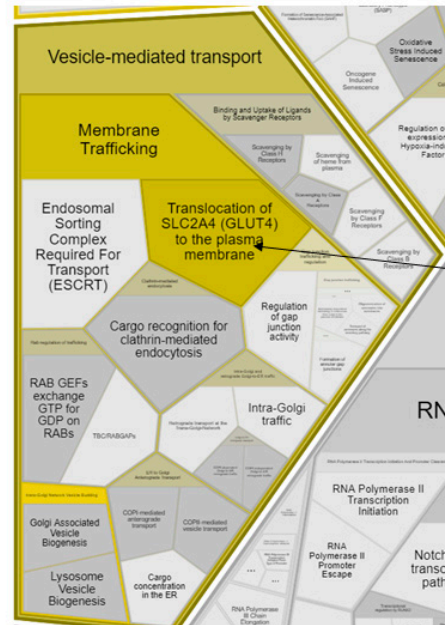

LBW

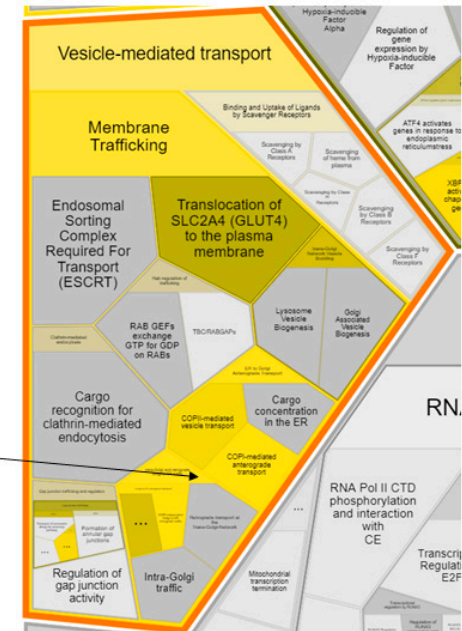

Translocation of SLC2A4 (GLUT4)

Vesicle-mediated transport:  
Anterograde and retrograde transport

Note: shapes are not exactly the same than in slide #1 since Reactome has been run at different times

## Anterograde transport, transport to the Golgi and N-glycosylation

NBW

LBW

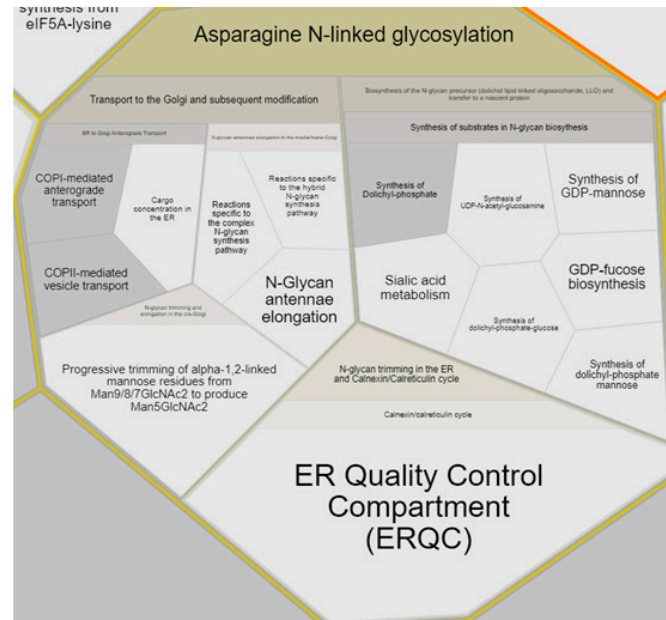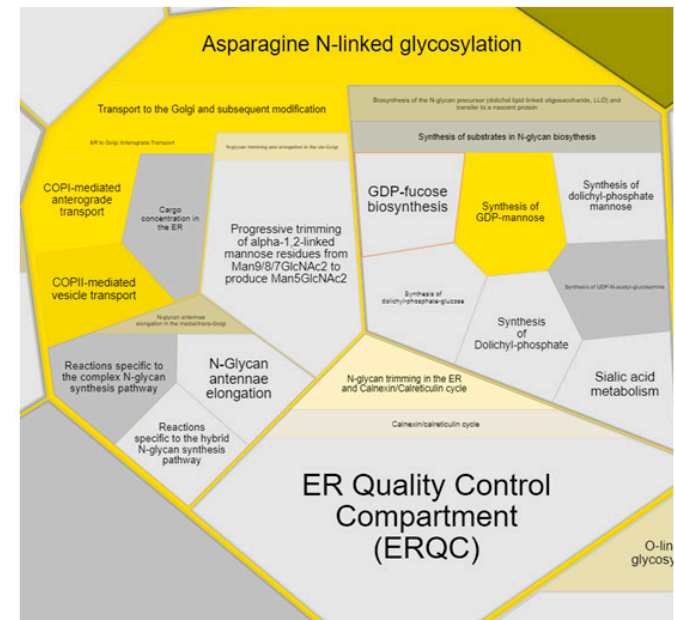

Note: shapes are not exactly the same than in slide #1 since Reactome has been run at different times



## Mitochondrial respiratory chain

### ATP synthesis

NBW

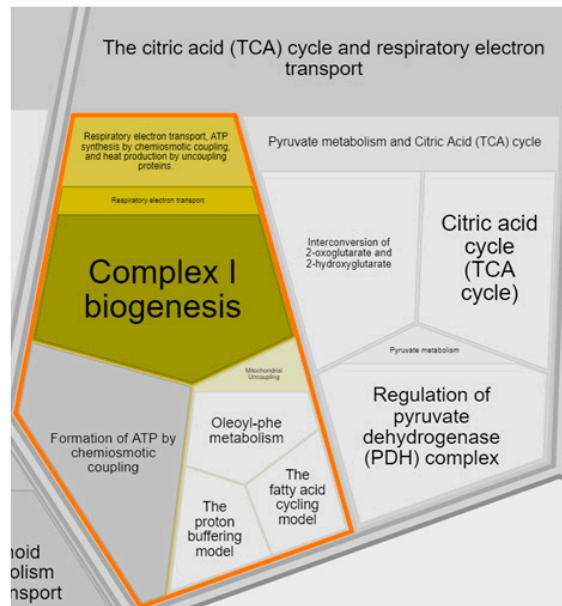

LBW

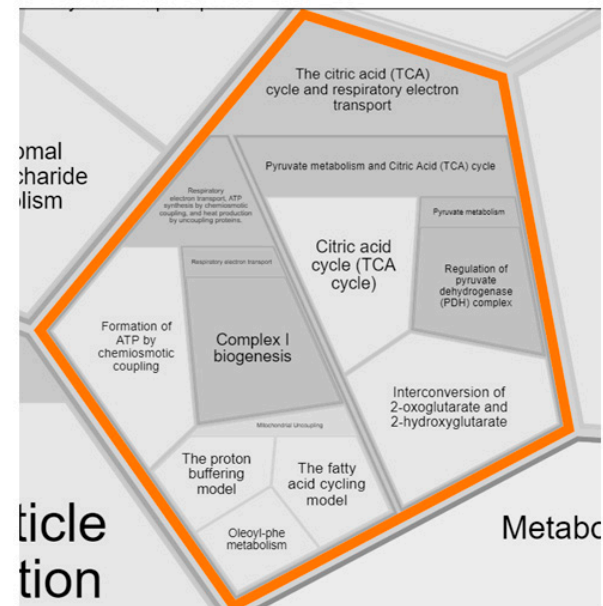

Note: shapes are not exactly the same than in slide #1 since Reactome has been run at different times

## Laminin, ECM Proteoglycans, Integrin interaction

NBW

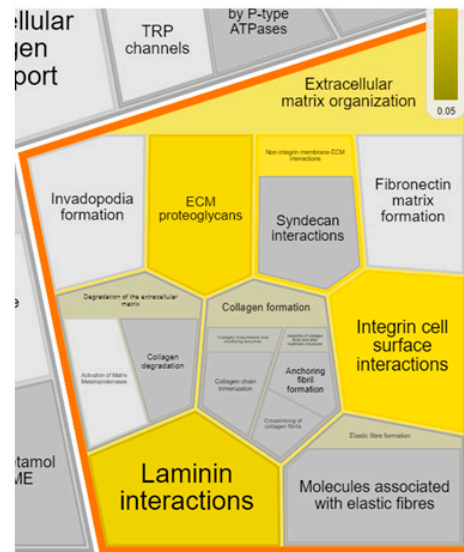

LBW

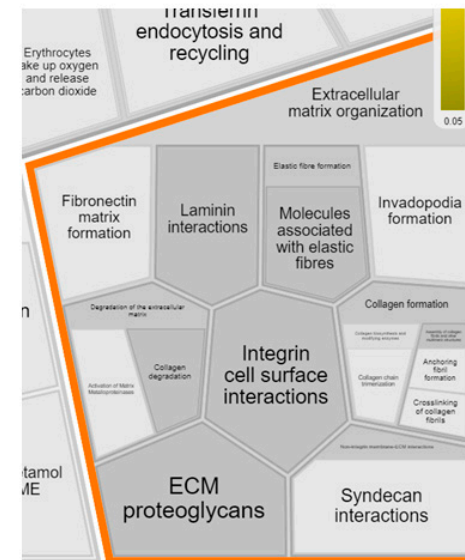

Note: shapes are not exactly the same than in slide #1 since Reactome has been run at different times

## RNA splicing

## NBW

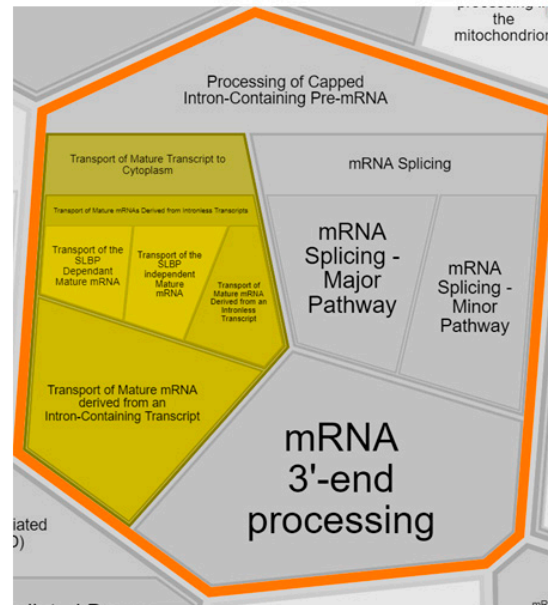

## LBW

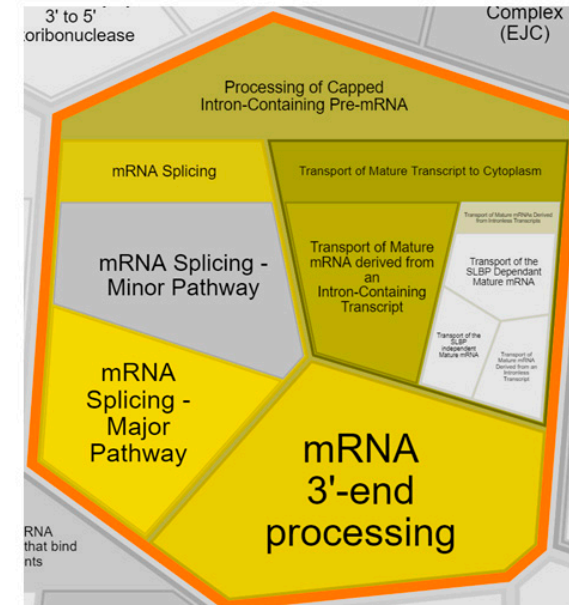

Note: shapes are not exactly the same than in slide #1 since Reactome has been run at different times

**Figure S2.** Network analysis by STRING of differentially abundant proteins in the hippocampus of one year-old pigs after being subjected to an HFD.

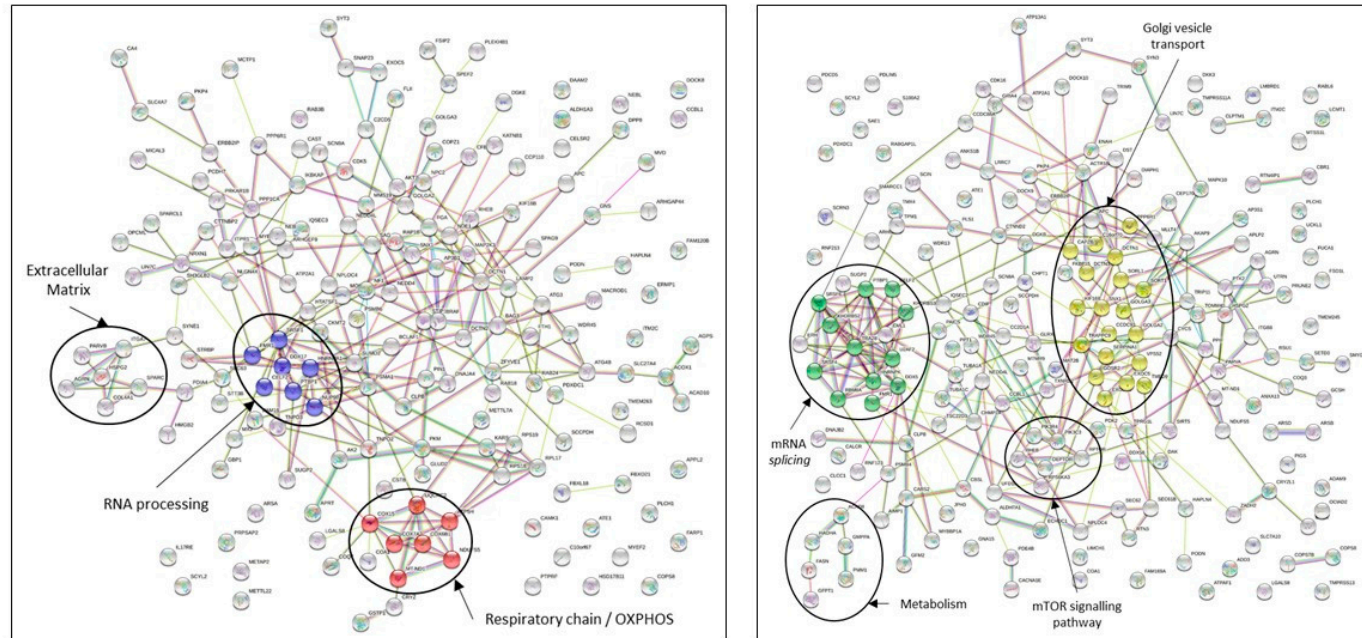

Supplementary Figure S2. Network analysis by STRING of differentially abundant proteins in the hippocampus of one year-old pigs after being subjected to an HFD. Upper panel: NBW group. Lower panel: LBW group. Different colours of the lines represent the types of evidence for association: Cyan line: database; Pink line: experimental; Green line: gene neighborhood evidence; Yellow line, text mining evidence; Black line, co-expression evidence.



**Table S1.** Design of the TMT experiment.

Experimental design for TMT10 labelling for individual samples from groups with different diet (Ctrl, HFD), birthweight (NBW, LBW) or sex (M, F). Pools are formed by mixing all samples

| Batch | 1       | 2       | 3       |
|-------|---------|---------|---------|
| 126   | Pool 1a | Pool 2a | Pool 3a |
| 127N  | C1.1    | C2.2    | T2.3    |
| 127C  | T1.1    | T4.2    | T3.3    |
| 128N  | C2.1    | C1.2    | C3.3    |
| 128C  | T2.1    | C4.2    | C1.3    |
| 129N  | C3.1    | T1.2    | C2.3    |
| 129C  | T3.1    | T2.2    | T1.3    |
| 130N  | C4.1    | T3.2    | T4.3    |
| 130C  | T4.1    | C3.2    | C4.3    |
| 131   | Pool 1b | Pool 2b | Pool 3b |

|              |             |
|--------------|-------------|
| Ctrl, NBW, M | HFD, NBW, M |
| Ctrl, NBW, F | HFD, LBW, F |
| Ctrl, LBW, M | HFD, LBW, M |
| Ctrl, LBW, F | HFD, LBW, F |

**Table S2.** Effect of diet, birth weight and sex on the concentration of neurotransmitters in different brain areas.

Concentration of neurotransmitters and their metabolites in several brain areas of 1 year-old pigs as a function of diet (Ctrl or HFD), birthweight (NBW or LBW) and sex (M, F). Significant differences are indicated in bold ( $p < 0.05$ ).

|          |           | Diet            |                 | Birthweight     |                 | Sex             |                 |
|----------|-----------|-----------------|-----------------|-----------------|-----------------|-----------------|-----------------|
|          |           | CTRL            | HFD             | NBW             | LBW             | Males           | Females         |
| Amygdala | NA        | 354.70 ± 36.20  | 354.60 ± 25.91  | 316.88 ± 20.52  | 394.20 ± 36.02  | 372.09 ± 39.03  | 339.47 ± 20.54  |
|          | DA        | 695.26 ± 23.10  | 687.56 ± 34.11  | 684.53 ± 26.06  | 699.99 ± 33.63  | 677.19 ± 29.73  | 706.16 ± 28.67  |
|          | DOPAC     | 490.59 ± 33.64  | 485.38 ± 27.80  | 460.02 ± 26.83  | 519.33 ± 32.99  | 464.62 ± 26.86  | 509.77 ± 32.60  |
|          | HVA       | 835.64 ± 30.06  | 898.72 ± 42.35  | 865.11 ± 30.63  | 875.98 ± 47.51  | 828.29 ± 31.26  | 908.18 ± 42.09  |
|          | 5-HT      | 1532.74 ± 67.39 | 1781.98 ± 68.26 | 1597.65 ± 63.65 | 1734.62 ± 80.04 | 1621.62 ± 85.47 | 1708.37 ± 52.73 |
|          | 5-HIAA    | 647.07 ± 20.28  | 662.96 ± 20.72  | 631.95 ± 16.56  | 682.51 ± 23.53  | 666.60 ± 21.95  | 643.98 ± 18.78  |
|          | Glutamate | 1378.05 ± 29.57 | 1379.02 ± 22.41 | 1365.29 ± 25.09 | 1393.17 ± 25.51 | 1366.06 ± 26.43 | 1391.14 ± 24.21 |
|          | GABA      | 234.41 ± 14.90  | 228.83 ± 9.40   | 220.78 ± 10.35  | 242.58 ± 13.39  | 223.87 ± 15.25  | 239.35 ± 6.90   |
| PFC      | NA        | 140.40 ± 12.82  | 127.30 ± 5.21   | 137.49 ± 10.18  | 128.02 ± 7.18   | 138.50 ± 11.46  | 127.41 ± 5.12   |
|          | DOPAC     | 71.41 ± 4.81    | 70.04 ± 3.50    | 70.90 ± 3.97    | 70.32 ± 4.13    | 73.99 ± 4.87    | 67.40 ± 2.95    |
|          | HVA       | 154.42 ± 4.38   | 148.22 ± 3.94   | 150.02 ± 4.12   | 151.65 ± 4.29   | 157.53 ± 4.20   | 144.40 ± 3.70   |
|          | 5-HT      | 343.30 ± 14.70  | 388.96 ± 15.44  | 355.58 ± 12.62  | 384.19 ± 18.89  | 383.08 ± 18.84  | 355.39 ± 12.03  |
|          | 5-HIAA    | 167.13 ± 6.75   | 174.50 ± 5.11   | 167.22 ± 4.65   | 175.80 ± 6.91   | 179.09 ± 6.64   | 163.54 ± 4.36   |
|          | Glutamate | 1395.06 ± 53.18 | 1363.04 ± 50.82 | 1372.83 ± 51.47 | 1380.70 ± 53.19 | 1451.83 ± 47.17 | 1294.20 ± 51.64 |
|          | GABA      | 158.84 ± 6.88   | 149.67 ± 6.45   | 150.67 ± 6.07   | 156.48 ± 7.39   | 159.16 ± 7.31   | 147.59 ± 5.81   |

|              |           |                         |                        |                           |                           |                        |                        |
|--------------|-----------|-------------------------|------------------------|---------------------------|---------------------------|------------------------|------------------------|
| Hippocampus  | NA        | 146.01 ± 8.33           | 157.59 ± 7.46          | 149.08 ± 7.68             | 155.20 ± 8.16             | 154.97 ± 8.47          | 149.81 ± 7.48          |
|              | DOPAC     | <b>69.14 ± 3.24</b>     | <b>81.54 ± 3.95</b>    | 73.61 ± 3.76              | 78.55 ± 4.07              | 75.57 ± 3.97           | 76.47 ± 3.93           |
|              | HVA       | 90.62 ± 3.39            | 89.84 ± 3.75           | 90.48 ± 3.15              | 89.89 ± 4.11              | 87.93 ± 3.97           | 92.47 ± 3.16           |
|              | 5-HT      | <b>351.86 ± 10.27</b>   | <b>437.69 ± 16.89</b>  | 391.84 ± 17.74            | 406.17 ± 16.65            | 413.31 ± 19.18         | 384.04 ± 14.60         |
|              | 5-HIAA    | 202.37 ± 6.11           | 214.71 ± 7.14          | 203.04 ± 5.77             | 215.17 ± 7.69             | 210.31 ± 7.58          | 207.12 ± 6.00          |
|              | Glutamate | 1564.26 ± 43.09         | 1542.23 ± 31.59        | 1528.05 ± 37.84           | 1579.79 ± 35.74           | <b>1623.69 ± 31.45</b> | <b>1487.96 ± 36.46</b> |
|              | GABA      | 324.92 ± 19.73          | 326.24 ± 14.97         | 317.92 ± 14.38            | 334.10 ± 19.76            | 334.22 ± 14.96         | 316.25 ± 19.20         |
| Striatum     | NA        | 369.41 ± 13.79          | 361.72 ± 10.25         | 362.73 ± 10.87            | 367.65 ± 12.83            | <b>392.53 ± 6.65</b>   | <b>336.5 ± 13.02</b>   |
|              | DA        | 23735.94 ± 1804.63      | 25133.4 ± 1537.62      | <b>21595.92 ± 1331.36</b> | <b>27804.05 ± 1736.27</b> | 24779.68 ± 1400.72     | 24173.06 ± 1917.56     |
|              | L-DOPA    | 2126.61 ± 172.94        | 2278.61 ± 140.8        | 2406.12 ± 163.75          | 1980.89 ± 128.51          | 2300.49 ± 156.33       | 2110.65 ± 154.25       |
|              | DOPAC     | <b>4290.25 ± 140.67</b> | <b>3801.7 ± 114.06</b> | 3940.13 ± 127.39          | 4101.12 ± 143.2           | 4117.79 ± 149.51       | 3915.37 ± 115.9        |
|              | HVA       | 11920.13 ± 539.6        | 11016.37 ± 417.44      | 10926.26 ± 482.43         | 11977.35 ± 453.49         | 11228.69 ± 519.96      | 11629.22 ± 439         |
|              | 3-MT      | 1328.39 ± 64.61         | 1218.82 ± 56.06        | <b>1194.76 ± 57.43</b>    | <b>1350.67 ± 60</b>       | 1306.3 ± 58.02         | 1226.98 ± 62.96        |
|              | 5-HT      | <b>712.28 ± 18.78</b>   | <b>772.98 ± 19.77</b>  | 724.27 ± 18.74            | 767.94 ± 21.27            | 757.9 ± 22.62          | 730.81 ± 17.29         |
|              | 5-HIAA    | 536.56 ± 21.63          | 568.49 ± 16.4          | 543.98 ± 19.42            | 564.57 ± 18.49            | 574 ± 18.65            | 532.25 ± 18.66         |
|              | Glutamate | 1306.26 ± 19.69         | 1331.95 ± 29.96        | 1340.03 ± 26.51           | 1295.69 ± 23.4            | 1348.97 ± 23.78        | 1288.43 ± 26.01        |
|              | GABA      | 350.4 ± 10.1            | 366.95 ± 10.51         | 362.93 ± 9.29             | 355.6 ± 11.8              | 370.31 ± 10.13         | 348.55 ± 10.41         |
| Hypothalamus | NA        | 8297,63 ± 703,64        | 10690,63 ± 779,06      | 9691,9 ± 781,6            | 9881,75 ± 896,83          | 9130,45 ± 611,61       | 10420,87 ± 981,88      |
|              | DA        | <b>356,92 ± 21,31</b>   | <b>419,56 ± 18,24</b>  | 399,83 ± 18,87            | 387,29 ± 23,37            | 394,44 ± 20,02         | 394,56 ± 21,45         |

|                  |                        |                       |                 |                 |                       |                       |
|------------------|------------------------|-----------------------|-----------------|-----------------|-----------------------|-----------------------|
| <b>L-DOPA</b>    | 631,72 ± 51,15         | 730,65 ± 38,73        | 728,74 ± 39,39  | 645,83 ± 50,18  | 696,4 ± 47,47         | 689,34 ± 43,03        |
| <b>DOPAC</b>     | 539,48 ± 29,07         | 540,55 ± 29,93        | 541,69 ± 31,47  | 538 ± 26,85     | 527,82 ± 22,62        | 551,25 ± 35,08        |
| <b>HVA</b>       | 612,88 ± 39,66         | 605,02 ± 27,38        | 616,73 ± 32,86  | 596,57 ± 29,81  | <b>555,2 ± 28,34</b>  | <b>656,08 ± 31,46</b> |
| <b>5-HT</b>      | <b>1213,71 ± 72,23</b> | <b>1432,88 ± 66,6</b> | 1305,82 ± 59,57 | 1393,08 ± 92,18 | 1299,07 ± 69,12       | 1382,89 ± 76,5        |
| <b>5-HIAA</b>    | 636,15 ± 28,47         | 673,82 ± 23,26        | 657,45 ± 25,46  | 661,78 ± 25,9   | 646,87 ± 27,13        | 671,18 ± 24,31        |
| <b>Glutamate</b> | 875,05 ± 32,23         | 824,57 ± 26,24        | 873,1 ± 25,57   | 805,17 ± 31,94  | <b>798,56 ± 19,47</b> | <b>890,43 ± 33,33</b> |
| <b>GABA</b>      | 384,69 ± 24,39         | 370,22 ± 11,92        | 381 ± 15,8      | 368,06 ± 17,28  | 385,36 ± 16,83        | 365,74 ± 16,04        |

Neurotransmitter concentrations are presented as mean ± SE. Units are in ng/g tissue except for glutamate and GABA, which are in µg/g tissue. NA: noradrenalin; DA: dopamine; DOPAC: 3,4-dihydroxyphenyl acetic acid; HVA: homovanillic acid; 3-MT: 3-Methoxytyramine; 5-HT: serotonin/5-hydroxytryptamine; 5-HIAA: 5-hydroxyindoleacetic acid; GABA: Gamma-Aminobutyric acid.

**Table S3.** Differentially abundant proteins in the hippocampus by diet, birth weight and sex.

Supplementary Table S3A: List of differential proteins identified comparing males and females

| Accession Number | Access UniProt Human | Access Uni-Prot Pig | Gene    | Identification                                                 | FC   | p-value | M vs F |
|------------------|----------------------|---------------------|---------|----------------------------------------------------------------|------|---------|--------|
| A0A4X1TU79       | P22234               | F1RTV5              | PAICS   | AIR carboxylase                                                | 0,61 | 0,001   | down   |
| A0A4X1SNG7       | Q567U6               | F1RY11              | CCDC93  | Coiled-coil domain-containing protein 93                       | 0,61 | 0,018   | down   |
| I3LLA0           | P49756               | I3LLA0              | RBM25   | RNA-binding protein 25                                         | 0,65 | 0,015   | down   |
| A0A480JMC0       | P47897               | M3TYW5              | QARS1   | Glutaminyl-tRNA synthetase                                     | 0,66 | 0,023   | down   |
| A0A287AEY8       | Q9Y3D7               | F1RK50              | PAM16   | Mitochondrial import inner membrane translocase sub-unit TIM16 | 1,50 | 0,016   | up     |
| A0A5G2QU93       | Q9GZY4               | I3LR62              | COA1    | Cytochrome c oxidase assembly factor 1 homolog                 | 1,52 | 0,018   | up     |
| M3VH45           | P08133               | F1S0V3              | ANXA6   | Annexin A6                                                     | 1,53 | 0,024   | up     |
| A0A287B0D3       | Q05586               | A0A287B0D3          | GRIN1   | Glutamate receptor ionotropic, NMDA 1                          | 1,54 | 0,047   | up     |
| A0A287AN84       | Q9NRG1               | I3LDD5              | PRTFDC1 | Phosphoribosyl transferase domain containing 1                 | 1,70 | 0,008   | up     |
| A0A4X1VBH3       | P53671               | F2Z4Y3              | LIMK2   | LIM domain kinase 2                                            | 2,61 | 0,002   | up     |

Supplementary Table S3B: List of differential proteins identified comparing birthweight

| Accession  | Accession UniProt Human | Accession UniProt Pig | Gene     | Identification                                        | FC   | p-value | NBW vs LBW |
|------------|-------------------------|-----------------------|----------|-------------------------------------------------------|------|---------|------------|
| A0A287AH65 | Q15052                  | A0A287AH65            | ARHGEF6  | Rac/Cdc42 guanine nucleotide exchange factor 6        | 0,40 | 0,009   | down       |
| A0A480EJB5 | Q3LXA3                  | F1RKQ4                | TKFC     | ATP-dependent dihydroxyacetone kinase                 | 0,44 | 0,033   | down       |
| A0A480MD89 | Q8WXH2                  | F1S6K2                | JPH3     | Junctophilin                                          | 0,59 | 0,045   | down       |
| A0A4X1UGZ2 | P53004                  | F1SSF5                | BLVRA    | Biliverdin reductase A                                | 0,62 | 0,009   | down       |
| A0A480X9B8 | O94952                  | F1RKE9                | FBXO21   | F-box only protein 21                                 | 0,63 | 0,044   | down       |
| A0A4X1THN7 | Q6NUK1                  | F6Q4L6                | SLC25A24 | Calcium-binding mitochondrial carrier protein SCaMC-1 | 0,64 | 0,001   | down       |
| E3US74     | Q9P2P5                  | E3US74                | HECW2    | HECT-type E3 ubiquitin transferase                    | 0,66 | 0,032   | down       |



|            |        |            |          |                                              |      |       |      |
|------------|--------|------------|----------|----------------------------------------------|------|-------|------|
| A0A4X1VAS0 | Q9P2S2 | A0A5G2R504 | NRXN2    | Neurexin-2                                   | 0,67 | 0,010 | down |
| A0A5G2QEW3 | P51812 | F1SQN4     | RPS6KA3  | Non-specific serine/threonine protein kinase | 1,51 | 0,026 | up   |
| A0A4X1TXB7 | Q96KQ4 | F1S9X3     | PPP1R13B | Protein phosphatase 1 regulatory subunit 13B | 1,56 | 0,001 | up   |
| A0A480PH82 | O43719 | I3LC46     | HTATSF1  | HIV Tat-specific factor 1                    | 1,57 | 0,040 | up   |
| Q06AA9     | P62837 | Q06AA9     | UBE2D2   | Ubiquitin-conjugating enzyme E2 D2           | 1,57 | 0,039 | up   |
| A0A287A2D7 | Q15643 | A0A287A2D7 | TRIP11   | Thyroid hormone receptor interactor 11       | 1,62 | 0,047 | up   |

Supplementary Table S3C: List of differential proteins identified comparing diets

| Accession  | Acceso UniProt Human | Acceso UniProt Pig | Gen     | Identificación                                           | FC   | P-valor | Ctrl vs HFD |
|------------|----------------------|--------------------|---------|----------------------------------------------------------|------|---------|-------------|
| A0A286ZYE1 | Q8IV36               | F1RVV6             | HID1    | HID1 domain containing                                   | 0,56 | 0,001   | down        |
| A0A4X1W3R7 | Q8WZ74               | F1SJF2             | CTTNBP2 | Cortactin-binding protein 2                              | 0,62 | 0,017   | down        |
| A0A4X1TPC2 | P62750               | A0A4X1TPC2         | RPL23A  | 60S ribosomal protein L23a                               | 0,62 | 0,011   | down        |
| A0A4X1VIL0 | P21246               | P79281             | PTN     | Pleiotrophin                                             | 0,63 | 0,044   | down        |
| A0A4X1V053 | O75077               | F1SHD2             | ADAM23  | ADAM metalloproteinase domain 23                         | 0,66 | 0,022   | down        |
| A0A481DW99 | Q6UWR7               | F1RSZ8             | ENPP6   | Choline-specific glycerophosphodiester phosphodiesterase | 1,51 | 0,012   | up          |
| A0A480N196 | Q8WVM8               | F1SHF4             | SCFD1   | Sec1 family domain-containing protein 1 isoform a        | 1,52 | 0,019   | up          |
| A0A4X1W5X8 | O43657               | F1S1M4             | TSPAN6  | Tetraspanin                                              | 1,53 | 0,016   | up          |

**Table S4.** List of differentially abundant proteins in the hippocampus comparing NBW-Ctrl versus NBW-HFD and LBW-Ctrl versus LBW-HFD.

| Accession  | Uniprot Human | Uniprot Pig | gene     | Description                                                             | FC     | P.Va-lue | CLBW vs HFDLB W | FC   | P.Va-lue | CNBW vs HFDNB W |
|------------|---------------|-------------|----------|-------------------------------------------------------------------------|--------|----------|-----------------|------|----------|-----------------|
| A0A4X1V8T0 | Q9UKU7        | A0A4X1V8T0  | ACAD8    | Isobutyryl-CoA dehydrogenase, mitochondrial                             | 0,5825 | 0,014    | down            | 0,75 | 0,1872   |                 |
| A0A480R7G2 | P42025        | F1STD5      | ACTR1B   | Beta-centractin                                                         | 0,6421 | 0,027    | down            | 0,88 | 0,5151   |                 |
| A0A4X1SMM1 | Q9UEY8        | F1S5M9      | ADD3     | Gamma-adducin                                                           | 0,5596 | 0,0096   | down            | 0,88 | 0,5409   |                 |
| A0A5K1VI30 | Q12904        | A0A5K1VI30  | AIMP1    | Aminoacyl tRNA synthetase complex interacting multifunctional protein 1 | 0,5848 | 0,0308   | down            | 0,67 | 0,1097   |                 |
| A0A480VDF1 | Q99996        | I3LR05      | AKAP9    | A-kinase anchoring protein 9                                            | 0,6105 | 0,0147   | down            | 1,18 | 0,3948   |                 |
| A0A480X1N8 | P49419        | F1RKM1      | ALDH7A1  | Alpha-aminoadipic semialdehyde dehydrogenase                            | 0,5065 | 0,0409   | down            | 0,78 | 0,4527   |                 |
| F1SQT8     | Q7Z6G8        | F1SQT8      | ANKS1B   | Ankyrin repeat and sterile alpha motif domain-containing protein 1B     | 0,5902 | 0,0072   | down            | 1,21 | 0,3207   |                 |
| A0A480SXF6 | Q06481        | C7C1H8      | APLP2    | Amyloid-like protein 2 isoform 1                                        | 0,6285 | 0,0228   | down            | 0,95 | 0,8027   |                 |
| A0A4X1T255 | P15848        | A0A4X1T255  | ARSB     | Arylsulfatase B                                                         | 0,6131 | 0,0126   | down            | 1,06 | 0,7406   |                 |
| A0A287B1K5 | Q9HD20        | F1S7C4      | ATP13A1  | ATPase 13A1                                                             | 0,6204 | 0,03     | down            | 1,24 | 0,3264   |                 |
| A0A4X1UPW6 | Q9BSU1        | A0A287BJH7  | C16orf70 | Chromosome 6 C16orf70 homolog                                           | 0,6564 | 0,044    | down            | 1,02 | 0,9295   |                 |
| A0A4X1W5K9 | P47756        | A0PFK7      | CAPZB    | F-actin-capping protein subunit beta                                    | 0,5468 | 0,0027   | down            | 0,96 | 0,8238   |                 |

|            |        |            |        |                                                        |            |            |      |          |            |  |
|------------|--------|------------|--------|--------------------------------------------------------|------------|------------|------|----------|------------|--|
| A0A5G2QA46 | Q6P1N0 | F1SD63     | CC2D1A | Coiled-coil and C2 domain containing 1A                | 0,58       | 0,034<br>3 | down | 1,1<br>5 | 0,577<br>4 |  |
| A0A4X1U1H8 | O14735 | D0G6R6     | CDIPT  | CDP-diacylglycerol--inositol 3-phosphatidyltransferase | 0,560<br>7 | 0,014<br>6 | down | 1,2<br>8 | 0,296<br>4 |  |
| A0A4X1THF5 | Q00536 | K7GRV3     | CDK16  | Cyclin dependent kinase 16                             | 0,615<br>7 | 0,049      | down | 0,8<br>1 | 0,403<br>3 |  |
| A0A4X1T669 | Q5SW79 | I3LU72     | CEP170 | Centrosomal protein of 170 kDa                         | 0,579<br>6 | 0,001<br>5 | down | 0,7<br>8 | 0,118<br>9 |  |
| A0A481CY36 | O43633 | I3LSS2     | CHMP2A | Charged multivesicular body protein 2a                 | 0,609<br>3 | 0,038<br>8 | down | 0,8<br>8 | 0,595<br>9 |  |
| A0A4X1T0Z2 | Q8WUD6 | A0A287B7T8 | CHPT1  | Choline phosphotransferase 1                           | 0,546<br>5 | 0,014<br>8 | down | 0,8<br>4 | 0,465      |  |
| A0A5G2RB82 | Q96S66 | F1S5Y7     | CLCC1  | Chloride channel CLIC-like protein 1                   | 0,595<br>7 | 0,033<br>2 | down | 1,0<br>6 | 0,810<br>4 |  |
| A0A4X1U103 | P99999 | P62895     | CYCS   | Cytochrome c                                           | 0,632<br>6 | 0,001<br>9 | down | 1,0<br>3 | 0,817<br>5 |  |
| A0A5G2Q8X4 | O75935 | F1SEC0     | DCTN3  | Dynactin subunit 3                                     | 0,662<br>4 | 0,034      | down | 1,3<br>1 | 0,175<br>7 |  |
| A0A286ZM27 | P17844 | A0A286ZM27 | DDX5   | DEAD box protein 5                                     | 0,604<br>4 | 0,023<br>2 | down | 1,1<br>3 | 0,573<br>5 |  |
| B9WZD6     | O95786 | Q9GLV6     | DDX58  | Antiviral innate immune response receptor RIG-I        | 0,540<br>6 | 0,009<br>4 | down | 0,8<br>5 | 0,483<br>9 |  |
| A0A5G2R656 | Q8TB45 | A0A480DP04 | DEPTOR | DEP domain-containing mTOR-interacting protein         | 0,537<br>9 | 0,000<br>9 | down | 1,2<br>8 | 0,149<br>6 |  |
| A0A4X1TKE5 | Q9Y6T7 | F1SF62     | DGKB   | Diacylglycerol kinase beta                             | 0,604<br>7 | 0,009      | down | 1,1<br>1 | 0,575<br>4 |  |
| A0A4X1SNQ3 | O60610 | F1RMT5     | DIAPH1 | Diaphanous related formin 1                            | 0,562<br>6 | 0,007<br>6 | down | 0,9<br>1 | 0,632<br>1 |  |

|            |                |            |         |                                                        |            |            |      |          |            |  |
|------------|----------------|------------|---------|--------------------------------------------------------|------------|------------|------|----------|------------|--|
| A0A4X1UT57 | Q9BZ29         | I3LTY2     | DOCK9   | Dedicator of cytokinesis 9                             | 0,578<br>5 | 0,012      | down | 0,9<br>9 | 0,955      |  |
| F1S2X3     | Q9NTX5         | F1S2X3     | ECHDC1  | Ethylmalonyl-CoA decarboxylase 1                       | 0,664<br>9 | 0,027<br>4 | down | 1,0<br>6 | 0,753<br>9 |  |
| A0A5G2Q8W0 | O00423         | I3LKT2     | EML1    | Echinoderm microtubule-associated protein-like 1       | 0,628<br>1 | 0,029<br>7 | down | 1,0<br>5 | 0,834<br>4 |  |
| I3LDY1     | O00423         | I3LDY1     | EML1    | Echinoderm microtubule-associated protein-like 1       | 0,623<br>5 | 0,030<br>8 | down | 0,9<br>1 | 0,651<br>2 |  |
| A0A481BSH3 | A0A0U1RRM<br>6 | F1S8S4     | ENAH    | Protein enabled homolog isoform a                      | 0,609<br>2 | 0,038<br>8 | down | 0,9<br>1 | 0,697<br>8 |  |
| A0A480SB04 | Q96RT1         | F1SKS3     | ERBIN   | Erbin isoform 1                                        | 0,49       | 0,021      | down | 1,1      | 0,741<br>8 |  |
| F2Z5J5     | P84090         | P80230     | ERH     | Enhancer of rudimentary homolog                        | 0,606      | 0,000<br>7 | down | 0,7<br>9 | 0,085<br>9 |  |
| A0A4X1W2F0 | Q9Y2D4         | I3LRV0     | EXOC6B  | Exocyst complex component 6B                           | 0,665<br>5 | 0,012<br>3 | down | 0,9<br>8 | 0,886<br>8 |  |
| A0A5K1VT17 | Q9Y6X4         | F1S2J5     | FAM169A | Family with sequence similarity 169 member A           | 0,566<br>6 | 0,004      | down | 0,7<br>9 | 0,206<br>7 |  |
| A0A287BEG6 | Q9BXM9         | F1SP51     | FSD1L   | Fibronectin type III and SPRY domain containing 1 like | 0,389      | 0,002<br>8 | down | 0,9<br>2 | 0,785<br>1 |  |
| F1SP51     | Q9BXM9         | F1SP51     | FSD1L   | Fibronectin type III and SPRY domain containing 1 like | 0,539<br>1 | 0,004<br>5 | down | 1,0<br>4 | 0,862<br>8 |  |
| A0A4X1VXR8 | P04066         | I3LNS9     | FUCA1   | Alpha-L-fucosidase                                     | 0,591<br>6 | 0,020<br>1 | down | 1,0<br>1 | 0,973<br>4 |  |
| A0A4X1SFJ5 | P23434         | A0A4X1SFJ5 | GCSH    | Glycine cleavage system H protein, mitochondrial       | 0,655<br>2 | 0,006<br>4 | down | 1,1<br>7 | 0,288<br>1 |  |
| A0A4X1SRA1 | Q969S9         | F1S2J6     | GFM2    | Ribosome-releasing factor 2, mitochondrial             | 0,567<br>7 | 0,038<br>1 | down | 0,8<br>7 | 0,596<br>6 |  |

|            |        |            |                  |                                                                    |            |            |      |          |            |
|------------|--------|------------|------------------|--------------------------------------------------------------------|------------|------------|------|----------|------------|
| F1SPM7     | Q06210 | F1SPM7     | GFPT1            | Glutamine--fructose-6-phosphate transaminase (isomerizing)         | 0,578<br>3 | 0,044<br>7 | down | 0,8      | 0,425<br>9 |
| P12309     | P35754 | P12309     | GLRX             | Glutaredoxin-1                                                     | 0,659<br>7 | 0,021<br>5 | down | 0,7      | 0,054<br>1 |
| A0A4X1UEN1 | Q96IJ6 | I3LUP1     | GMPPA            | Mannose-1-phosphate guanyltransferase alpha                        | 0,515<br>9 | 0,037<br>1 | down | 0,7<br>8 | 0,432<br>8 |
| F1S8F1     | P30679 | F1S8F1     | GNA15            | G protein subunit alpha 15                                         | 0,482<br>3 | 0,015<br>4 | down | 1,0<br>2 | 0,937<br>6 |
| A0A4X1TDL2 | O14653 | A0A287BIC8 | GOSR2            | Golgi SNAP receptor complex member 2 isoform A                     | 0,625<br>3 | 0,027<br>4 | down | 1,0<br>4 | 0,857<br>8 |
| A0A4X1THI5 | P48058 | I3L8N9     | GRIA4            | Glutamate receptor 4                                               | 0,623<br>3 | 0,016<br>5 | down | 1,0<br>8 | 0,703<br>4 |
| A0A4X1UTG0 | P61978 | I3LQS0     | HNRNPK           | Heterogeneous nuclear ribonucleoprotein K                          | 0,625<br>3 | 0,013<br>8 | down | 0,9<br>5 | 0,770<br>7 |
| A0A5G2QIL6 | Q5JU85 | F1RUI3     | IQSEC2           | IQ motif and Sec7 domain ArfGEF 2                                  | 0,497<br>6 | 0,007<br>2 | down | 1,0<br>9 | 0,727<br>8 |
| A0A287AXX5 | Q5VWX1 | F1RZV6     | KHDRBS2          | KH RNA binding domain containing, signal transduction associated 2 | 0,556<br>7 | 0,005      | down | 1,2<br>9 | 0,211<br>2 |
| A0A4X1VAK5 | Q9UIC8 | F1RFE3     | LCMT1            | Leucine carboxyl methyltransferase 1                               | 0,542<br>6 | 0,024<br>3 | down | 1,0<br>6 | 0,84       |
| F1RTT5     | Q9NUN5 | F1RTT5     | LMBRD1           | LMBR1 domain containing 1                                          | 0,649<br>7 | 0,036      | down | 0,8<br>8 | 0,524<br>3 |
| A0A4X1U7M0 | P32455 | F1S4D7     | LOC10052366<br>8 | GB1/RHD3-type G domain-containing protein                          | 0,657<br>1 | 0,026<br>1 | down | 1,1<br>4 | 0,484<br>3 |
| A0A4X1U8J5 | Q96NW7 | F1S832     | LRRC7            | Leucine-rich repeat-containing protein 7                           | 0,656<br>9 | 0,026<br>6 | down | 0,9<br>6 | 0,841<br>3 |
| A0A4X1U4R2 | Q9NZL9 | I3LU04     | MAT2B            | Methionine adenosyltransferase 2 subunit beta                      | 0,560<br>6 | 0,029<br>6 | down | 0,8<br>9 | 0,661<br>9 |



|                |        |                |        |                                                               |            |            |      |          |            |  |
|----------------|--------|----------------|--------|---------------------------------------------------------------|------------|------------|------|----------|------------|--|
| A0A4X1SEK9     | P02795 | P79379         | MT2A   | Metallothionein-2                                             | 0,636      | 0,029<br>8 | down | 0,9<br>6 | 0,830<br>2 |  |
| A0A480WKW<br>9 | Q765P7 | A0A480WKW<br>9 | MTSS2  | MTSS 2 protein                                                | 0,649<br>7 | 0,007<br>9 | down | 0,8<br>6 | 0,325<br>4 |  |
| Q71KI1         | P03886 | O79874         | NADH1  | NADH-ubiquinone oxidoreductase chain 1                        | 0,465<br>4 | 0,002<br>1 | down | 0,8<br>2 | 0,378<br>4 |  |
| A0A5G2R6P9     | Q56VL3 | F1SE82         | OCIAD2 | OCIA domain containing 2                                      | 0,505<br>6 | 0,027<br>1 | down | 1,0<br>1 | 0,966<br>4 |  |
| A0A5G2Q930     | O14737 | F1RNX2         | PDCD5  | Programmed cell death 5                                       | 0,565<br>8 | 0,004<br>6 | down | 1,0<br>6 | 0,751<br>3 |  |
| A0A480ME27     | Q07343 | F1S820         | PDE4B  | cAMP-specific 3',5'-cyclic phosphodiesterase 4B               | 0,598<br>1 | 0,013<br>7 | down | 1,1<br>2 | 0,570<br>1 |  |
| A0A287BI36     | Q96HC4 | F1RWW4         | PDLIM5 | PDZ and LIM domain 5                                          | 0,627<br>6 | 0,032<br>1 | down | 0,8<br>5 | 0,463<br>5 |  |
| A0A4X1TYE8     | Q6P996 | A0A287B2K7     | PDXDC1 | Pyridoxal-dependent decarboxylase domain-containing protein 1 | 0,615<br>1 | 0,029<br>6 | down | 0,9<br>4 | 0,760<br>4 |  |
| A0A4X1TMK4     | Q96S52 | I3LRK9         | PIGS   | Phosphatidylinositol glycan anchor biosynthesis class S       | 0,659<br>2 | 0,036<br>3 | down | 0,8<br>9 | 0,558<br>3 |  |
| A0A4X1V428     | Q8NEB9 | Q5D891         | PIK3C3 | Phosphatidylinositol 3-kinase catalytic subunit type 3        | 0,664      | 0,038<br>5 | down | 1,3<br>6 | 0,129<br>7 |  |
| A0A481B2C1     | Q99570 | K9IWD2         | PIK3R4 | Phosphoinositide 3-kinase regulatory subunit 4                | 0,512<br>5 | 0,028<br>5 | down | 1,0<br>3 | 0,915<br>1 |  |
| A0A4X1SPN4     | Q4KWH8 | I3LFF0         | PLCH1  | Phosphoinositide phospholipase C                              | 0,587      | 0,013<br>9 | down | 1,1<br>2 | 0,602      |  |
| A0A4X1W4L6     | Q92871 | F1SRD8         | PMM1   | Phosphomannomutase                                            | 0,638<br>4 | 0,026<br>6 | down | 1,3<br>7 | 0,126      |  |
| A0A4X1W406     | Q8WUY3 | A0A286ZRA1     | PRUNE2 | Protein prune homolog 2                                       | 0,512<br>4 | 0,028<br>8 | down | 0,6<br>7 | 0,196<br>4 |  |

|            |        |        |          |                                                 |            |            |      |          |            |  |
|------------|--------|--------|----------|-------------------------------------------------|------------|------------|------|----------|------------|--|
| A0A480MP33 | E7ESA6 | F1RJS6 | PTK2     | Non-specific protein-tyrosine kinase            | 0,486<br>2 | 0,017<br>5 | down | 0,7      | 0,232<br>3 |  |
| F1S725     | Q5R372 | F1S725 | RABGAP1L | Rab GTPase-activating protein 1-like            | 0,571<br>4 | 0,021<br>5 | down | 0,9<br>4 | 0,786<br>6 |  |
| I3LI59     | Q9Y5S9 | I3LI59 | RBM8A    | RNA-binding protein 8A                          | 0,614<br>9 | 0,016<br>2 | down | 1,1<br>5 | 0,491<br>1 |  |
| A0A5K1U3A5 | P51812 | F1SQN4 | RPS6KA3  | Ribosomal protein S6 kinase alpha-3             | 0,623<br>8 | 0,033<br>2 | down | 1,1<br>3 | 0,58       |  |
| A0A4X1UGB7 | Q8N122 | I3L942 | RPTOR    | Regulatory associated protein of MTOR complex 1 | 0,545<br>7 | 0,035<br>6 | down | 1,5<br>7 | 0,128<br>2 |  |
| A0A287BB01 | Q95197 | F1RPY3 | RTN3     | Reticulon 3                                     | 0,586<br>6 | 0,029<br>7 | down | 0,9<br>8 | 0,932<br>7 |  |
| F1RT47     | Q8WWV3 | F1RT47 | RTN4IP1  | Reticulon 4 interacting protein 1               | 0,635<br>1 | 0,037<br>8 | down | 0,8<br>8 | 0,571<br>2 |  |
| A0A4X1W0M9 | P29034 | K7GQ95 | S100A2   | S100 calcium binding protein A2                 | 0,440<br>1 | 0,048<br>7 | down | 1,5<br>5 | 0,296<br>2 |  |
| F1RM03     | Q9UBE0 | F1RM03 | SAE1     | SUMO1 activating enzyme subunit 1               | 0,548<br>7 | 0,025<br>7 | down | 0,7<br>4 | 0,262<br>4 |  |
| A0A287AE16 | Q9Y6U3 | Q29297 | SCIN     | Adseverin                                       | 0,514<br>6 | 0,033<br>3 | down | 0,9<br>7 | 0,919<br>9 |  |
| I3L8U8     | Q0VDG4 | I3L8U8 | SCRN3    | Secernin 3                                      | 0,617<br>4 | 0,026<br>6 | down | 1,0<br>8 | 0,708<br>9 |  |
| A0A4X1SGW5 | P60468 | F2Z5P0 | SEC61B   | SEC61 translocon subunit beta                   | 0,583<br>5 | 0,026<br>6 | down | 1,0<br>1 | 0,950<br>4 |  |
| A0A5G2QSI1 | Q99442 | I3LND2 | SEC62    | Translocation protein SEC62                     | 0,607<br>1 | 0,036<br>6 | down | 0,9<br>9 | 0,972      |  |
| A0A4X1TLR3 | Q9NS82 | F1RNW8 | SLC7A10  | Asc-type amino acid transporter 1               | 0,603<br>5 | 0,031<br>9 | down | 1,3      | 0,273<br>1 |  |

|            |        |            |          |                                                                          |            |            |      |          |            |  |
|------------|--------|------------|----------|--------------------------------------------------------------------------|------------|------------|------|----------|------------|--|
| A0A5G2QZ94 | Q92922 | F1SLI6     | SMARCC1  | SWI/SNF complex subunit SMARCC1                                          | 0,611<br>5 | 0,039<br>4 | down | 0,9<br>7 | 0,902<br>4 |  |
| A0A4X1VJH0 | Q92673 | I3L8K1     | SORL1    | Low-density lipoprotein receptor relative with 11 ligand-binding repeats | 0,546<br>8 | 0,010<br>7 | down | 0,7<br>7 | 0,248      |  |
| H2B2M0     | Q99523 | F1S5Z7     | SORT1    | Sortilin 1                                                               | 0,625<br>2 | 0,047<br>4 | down | 1,1<br>2 | 0,645<br>8 |  |
| A0A4X1SVT4 | Q08170 | F6QB00     | SRSF4    | Serine/arginine-rich splicing factor 4 isoform X1                        | 0,651<br>6 | 0,044<br>1 | down | 1,2<br>2 | 0,358<br>1 |  |
| F1S3E0     | Q9BVK6 | F1S3E0     | TMED9    | Transmembrane emp24 domain-containing protein 9                          | 0,646<br>8 | 0,015<br>9 | down | 0,8<br>3 | 0,299<br>3 |  |
| A0A287BNI4 | Q9BYE2 | A0A287BNI4 | TMPRSS13 | Transmembrane serine protease 13                                         | 0,657<br>8 | 0,025      | down | 0,8      | 0,223<br>7 |  |
| A0A5G2QKH8 | O96008 | F1RM44     | TOMM40   | Translocase of outer mitochondrial membrane 40                           | 0,563<br>8 | 0,020<br>8 | down | 1,1      | 0,692<br>9 |  |
| A0A4X1TYJ1 | P09493 | P42639     | TPM1     | Tropomyosin alpha-1 chain                                                | 0,657<br>2 | 0,009<br>7 | down | 0,9<br>7 | 0,868<br>5 |  |
| A0A5G2QFH4 | P62995 | Q06AA7     | TRA2B    | Transformer 2 beta homolog                                               | 0,655<br>1 | 0,023<br>7 | down | 1,0<br>5 | 0,808<br>4 |  |
| F1RSJ3     | Q96Q05 | F1RSJ3     | TRAPPC9  | Trafficking protein particle complex 9                                   | 0,650<br>6 | 0,030<br>9 | down | 1,1<br>5 | 0,469<br>3 |  |
| A0A287BA16 | Q15643 | A0A287BA16 | TRIP11   | Thyroid hormone receptor interactor 11                                   | 0,483<br>3 | 0,01       | down | 0,7<br>9 | 0,377<br>9 |  |
| A0A5G2QVF5 | E7EWD5 | P80220     | TSC22D3  | TSC22 domain family protein 3                                            | 0,484<br>6 | 0,003<br>9 | down | 1,3<br>6 | 0,195      |  |
| A7E1S5     | Q9BQE3 | A7E1S5     | TUBA1C   | Tubulin alpha-1C chain                                                   | 0,629<br>4 | 0,022<br>3 | down | 1,2<br>2 | 0,317<br>7 |  |
| A0A4X1TXV4 | P26368 | I3W8V7     | U2AF2    | Splicing factor U2AF 65 kDa subunit                                      | 0,647<br>5 | 0,030<br>9 | down | 0,8<br>1 | 0,303<br>3 |  |

|            |        |            |             |                                                                       |            |            |      |          |            |  |
|------------|--------|------------|-------------|-----------------------------------------------------------------------|------------|------------|------|----------|------------|--|
| A0A480L6C9 | Q9NWZ5 | M3UZ96     | UCKL1       | Uridine-cytidine kinase                                               | 0,625<br>3 | 0,042<br>1 | down | 0,9<br>2 | 0,711<br>8 |  |
| A0A4X1VNI8 | P46939 | K9J6K2     | UTRN        | Utrophin                                                              | 0,630<br>7 | 0,000<br>7 | down | 0,9<br>4 | 0,626<br>7 |  |
| A0A287AE08 | Q13443 | F1RZL4     | ADAM9       | Disintegrin and metalloproteinase domain-containing protein 9         | 1,513<br>9 | 0,040<br>9 | up   | 0,7<br>7 | 0,201<br>6 |  |
| A0A5G2R0R1 | P55196 | F1SBY5     | AFDN        | Afadin, adherens junction formation factor                            | 1,530<br>2 | 0,029<br>7 | up   | 0,8<br>3 | 0,348<br>8 |  |
| A0A4X1W927 | O00468 | I3LGD9     | AGRN        | Agrin                                                                 | 1,934<br>1 | 0,011<br>5 | up   | 1,0<br>7 | 0,801<br>1 |  |
| A0A4X1UV89 | Q12904 | A0A4X1UV89 | AIMP1       | Aminoacyl tRNA synthase complex-interacting multifunctional protein 1 | 1,744<br>5 | 0,008<br>5 | up   | 1,1<br>7 | 0,642<br>7 |  |
| A0A287A579 | Q99996 | I3LR05     | AKAP9       | A-kinase anchoring protein 9                                          | 1,840<br>1 | 0,018<br>3 | up   | 1,2<br>4 | 0,393<br>8 |  |
| A0A4X1T259 | P27216 | F1RRP6     | ANXA13      | Annexin A13                                                           | 1,862<br>4 | 0,008      | up   | 1,1<br>7 | 0,657<br>7 |  |
| A0A4X1U4C2 | Q92572 | A0A4X1U4C2 | AP3S1       | AP-3 complex subunit sigma-1                                          | 1,702<br>8 | 0,010<br>7 | up   | 1,0<br>4 | 0,843<br>9 |  |
| A0A480VYB2 | P51689 | I3LM95     | ARSD        | Arylsulfatase D isoform alpha                                         | 1,834      | 0,006<br>2 | up   | 0,8<br>5 | 0,449<br>5 |  |
| A0A4X1UHM9 | O14983 | F1RFH9     | ATP2A1      | Calcium-transporting ATPase                                           | 1,962<br>7 | 0,002<br>3 | up   | 0,8<br>7 | 0,482<br>7 |  |
| A0A287ANF8 | Q5TC12 | A0A287ANF8 | ATPAF1      | ATP synthase mitochondrial F1 complex assembly factor 1               | 1,659<br>1 | 0,031      | up   | 0,9<br>5 | 0,835<br>2 |  |
| A0A4X1U9P0 | Q9H425 | F1RG57     | C14H1orf198 | Chromosome 14 C1orf198 homolog                                        | 1,730<br>7 | 0,007      | up   | 0,8<br>1 | 0,274<br>5 |  |
| A0A5G2QMX2 | Q15878 | F1S675     | CACNA1E     | Voltage-dependent R-type calcium channel subunit alpha                | 1,886<br>2 | 0,005      | up   | 1,2      | 0,387<br>3 |  |

|                |        |            |         |                                                              |            |            |    |            |            |  |
|----------------|--------|------------|---------|--------------------------------------------------------------|------------|------------|----|------------|------------|--|
| A0A5S8KVN2     | P30988 | P25117     | CALCR   | Calcitonin receptor                                          | 1,701<br>3 | 0,015      | up | 0,9<br>9   | 0,974<br>2 |  |
| A0A4X1U688     | Q9HA77 | A0A4X1U688 | CARS2   | CysteinyI-tRNA synthetase                                    | 1,533<br>7 | 0,041<br>3 | up | 0,9<br>6   | 0,842<br>1 |  |
| A0A4X1U5Q5     | P16152 | Q28960     | CBR1    | Carbonyl reductase [NADPH] 1                                 | 1,641<br>2 | 0,033<br>5 | up | 1,1<br>8   | 0,482<br>8 |  |
| A0A287AYK3     | P35520 | A0A287AYK3 | CBS     | Cystathionine beta-synthase                                  | 1,719<br>7 | 0,021      | up | 0,8<br>8   | 0,571<br>6 |  |
| A0A287B7U3     | Q3V6T2 | F1SQK4     | CCDC88A | Coiled-coil domain containing 88A                            | 1,705<br>5 | 0,026      | up | 0,8<br>6   | 0,534<br>4 |  |
| F1RY11         | Q567U6 | F1RY11     | CCDC93  | Coiled-coil domain containing 93                             | 1,514<br>9 | 0,013<br>7 | up | 0,9<br>7   | 0,874<br>7 |  |
| A0A4X1VWW<br>9 | O96005 | F1RM47     | CLPTM1  | CLPTM1 regulator of GABA type A receptor forward trafficking | 1,706<br>3 | 0,013<br>6 | up | 0,9<br>0,9 | 0,602<br>2 |  |
| A0A4X1TFA8     | Q9H9Q2 | A0A4X1TFA8 | COPS7B  | COP9 signalosome complex subunit 7b                          | 1,696<br>6 | 0,003<br>6 | up | 1,2<br>8   | 0,150<br>3 |  |
| A0A4X1VJ44     | Q9NZJ6 | I3LD55     | COQ3    | Ubiquinone biosynthesis O-methyltransferase, mitochondrial   | 1,844<br>5 | 0,016<br>7 | up | 1,3<br>6   | 0,225<br>8 |  |
| A0A5G2QQG0     | O95825 | I3LQA0     | CRYZL1  | Crystallin zeta like 1                                       | 2,063<br>3 | 0,003<br>3 | up | 0,7<br>5   | 0,225<br>2 |  |
| A0A4X1TVF2     | Q9UQB3 | F1SRN5     | CTNND2  | Catenin delta-2                                              | 1,664      | 0,022<br>3 | up | 0,8<br>9   | 0,601<br>8 |  |
| A0A4X1TMF2     | Q9UBP4 | F6Q5E9     | DKK3    | Dickkopf_N domain-containing protein                         | 1,525<br>8 | 0,035<br>7 | up | 0,7<br>6   | 0,185<br>8 |  |
| A0A286ZVQ8     | P25686 | F1SR79     | DNAJB2  | DnaJ homolog subfamily B member 2                            | 1,749<br>9 | 0,026      | up | 1,0<br>3   | 0,903<br>1 |  |
| A0A480Q1W3     | Q96BY6 | F1SNP7     | DOCK10  | Dedicator of cytokinesis protein 10 isoform X9-like          | 1,760<br>8 | 0,026<br>3 | up | 1,0<br>5   | 0,837<br>3 |  |



|            |        |            |                  |                                                                             |              |            |    |          |            |  |
|------------|--------|------------|------------------|-----------------------------------------------------------------------------|--------------|------------|----|----------|------------|--|
| A0A480X0S5 | F6QMI7 | A0A480X0S5 | DST              | Dystonin isoform 1eA                                                        | 1,518<br>1   | 0,029<br>3 | up | 1,1<br>2 | 0,554<br>5 |  |
| Q9GLD4     | P49327 | I3LCW1     | FASN             | Fatty acid synthase (Fragment)                                              | 1,545<br>3   | 0,026      | up | 0,8<br>6 | 0,449<br>2 |  |
| A0A480N6P3 | Q5T1M5 | F1SN89     | FKBP15           | FK506-binding protein 15                                                    | 1,979<br>1   | 0,029      | up | 0,7<br>8 | 0,422<br>1 |  |
| A0A4X1SPU0 | Q969S9 | F1S2J6     | GFM2             | Ribosome-releasing factor 2, mitochondrial                                  | 1,500<br>5   | 0,035      | up | 1<br>1   | 0,989      |  |
| A0A480PE19 | P40939 | Q29554     | HADHA            | Trifunctional enzyme subunit alpha, mitochondrial                           | 2,101<br>6   | 0,001<br>8 | up | 1,2<br>1 | 0,379<br>3 |  |
| A4GUC2     | P26012 | A0A287AUF9 | ITGB8            | Integrin beta-8                                                             | 1,710<br>4   | 0,003<br>7 | up | 1,2<br>2 | 0,260<br>5 |  |
| A0A4X1T9U1 | Q8WXH2 | F1S6K2     | JPH3             | Junctophilin                                                                | 1,716<br>8   | 0,020<br>7 | up | 1,1<br>7 | 0,495<br>7 |  |
| A0A4X1SNV8 | O75525 | K7GNY3     | KHDRBS3          | KH domain-containing, RNA-binding, signal transduction-associated protein 3 | 1,52<br>1,52 | 0,032<br>1 | up | 1,0<br>3 | 0,859<br>4 |  |
| A0A287BNN8 | Q9UPQ0 | F1S4G7     | LIMCH1           | LIM and calponin homology domains 1                                         | 1,804<br>2   | 0,013<br>2 | up | 0,8<br>5 | 0,496<br>3 |  |
| A0A287AUT0 | P32455 | F1S4D7     | LOC10052366<br>8 | GB1/RHD3-type G domain-containing protein                                   | 1,575<br>1   | 0,023<br>8 | up | 1,1<br>4 | 0,516<br>5 |  |
| A0A4X1TYC3 | P53779 | K7GP94     | MAPK10           | Mitogen-activated protein kinase                                            | 1,871<br>7   | 0,032<br>5 | up | 1,7<br>2 | 0,074<br>4 |  |
| A0A5G2QN98 | Q9NZL9 | I3LU04     | MAT2B            | Methionine adenosyltransferase 2 subunit beta                               | 2,078<br>5   | 0,004<br>4 | up | 1,1<br>2 | 0,636<br>6 |  |
| A0A5G2R4H0 | Q96QG7 | A0A5G2R4H0 | MTMR9            | Myotubularin-related protein 9                                              | 1,522<br>5   | 0,030<br>9 | up | 1,3<br>5 | 0,129<br>4 |  |
| B5KN59     | P03886 | O79874     | NADH1            | NADH-ubiquinone oxidoreductase chain 1                                      | 1,630<br>4   | 0,036<br>2 | up | 0,9<br>3 | 0,764<br>3 |  |

|            |        |            |        |                                                      |            |            |    |          |            |  |
|------------|--------|------------|--------|------------------------------------------------------|------------|------------|----|----------|------------|--|
| F1RTV5     | P22234 | F1RTV5     | PAICS  | AIR carboxylase                                      | 1,638      | 0,041<br>8 | up | 0,9<br>4 | 0,809<br>8 |  |
| A0A5G2QCR7 | Q9NVD7 | I3L973     | PARVA  | Parvin alpha                                         | 1,574<br>5 | 0,009<br>4 | up | 1,1<br>6 | 0,371<br>2 |  |
| A0A480IMJ0 | Q07343 | F1S820     | PDE4B  | cAMP-specific 3',5'-cyclic phosphodiesterase 4B      | 1,523<br>9 | 0,036<br>1 | up | 1,1<br>1 | 0,589<br>4 |  |
| F1RT56     | Q15119 | F1RT56     | PDK2   | Protein-serine/threonine kinase                      | 1,690<br>8 | 0,007<br>3 | up | 1,0<br>3 | 0,860<br>7 |  |
| A0A4X1SQG1 | Q4KWH8 | I3LFF0     | PLCH1  | Phosphoinositide phospholipase C                     | 1,674      | 0,013<br>8 | up | 1,3<br>9 | 0,113<br>4 |  |
| F1SKF1     | Q14651 | F1SKF1     | PLS1   | Plastin 1                                            | 1,606<br>2 | 0,046<br>2 | up | 0,9<br>5 | 0,840<br>7 |  |
| F1S2E3     | P30405 | F1S2E3     | PPIF   | Peptidyl-prolyl cis-trans isomerase F, mitochondrial | 1,712<br>4 | 0,008<br>6 | up | 0,9<br>4 | 0,767<br>9 |  |
| A0A480TS65 | P50897 | A0A287AYH9 | PPT1   | Palmitoyl-protein hydrolase 1                        | 1,755<br>4 | 0,014<br>9 | up | 1,0<br>1 | 0,955<br>3 |  |
| A0A4X1W0Y8 | P28070 | Q29384     | PSMB4  | Proteasome subunit beta type-4                       | 1,604      | 0,013<br>9 | up | 0,8<br>6 | 0,434<br>5 |  |
| A0A287AMM5 | Q3YEC7 | F1RVY4     | RABL6  | RAB, member RAS oncogene family like 6               | 1,732<br>4 | 0,028<br>7 | up | 0,9<br>7 | 0,889<br>2 |  |
| A0A286ZKD3 | Q5XPI4 | I3LFZ7     | RNF123 | E3 ubiquitin-protein ligase RNF123                   | 1,553<br>5 | 0,037<br>9 | up | 0,7<br>5 | 0,187<br>8 |  |
| A0A480YJW7 | Q63HN8 | A0A480YJW7 | RNF213 | E3 ubiquitin-protein ligase RNF213 isoform 3         | 2,376<br>1 | 0,021      | up | 1,0<br>5 | 0,898<br>8 |  |
| A0A5G2Q990 | Q15404 | F1RW98     | RSU1   | Ras suppressor protein 1                             | 1,57       | 0,021<br>5 | up | 1,1<br>3 | 0,534<br>2 |  |
| A0A4X1WC18 | Q9UQD0 | F1SGK6     | SCN8A  | Sodium channel protein type 8 subunit alpha          | 1,727      | 0,001<br>6 | up | 0,9<br>7 | 0,860<br>5 |  |

|            |        |            |           |                                                          |            |            |    |            |              |  |
|------------|--------|------------|-----------|----------------------------------------------------------|------------|------------|----|------------|--------------|--|
| A0A4X1SHX2 | P01009 | P50447     | SERPINA1  | Alpha-1-antitrypsin                                      | 1,632<br>4 | 0,035<br>7 | up | 1,2<br>7   | 0,313<br>6   |  |
| A0A5G2R349 | Q86TU7 | F1SAQ4     | SETD3     | Protein-histidine N-methyltransferase                    | 1,807<br>5 | 0,016<br>9 | up | 1,0<br>8   | 0,75<br>0,75 |  |
| A0A4X1VJI2 | Q9NXA8 | A7XXV9     | SIRT5     | NAD-dependent protein deacylase sirtuin-5, mitochondrial | 1,927<br>8 | 0,039<br>4 | up | 0,8<br>2   | 0,537<br>4   |  |
| F1SLF4     | Q6GMV2 | F1SLF4     | SMYD5     | SMYD family member 5                                     | 1,703<br>2 | 0,014<br>6 | up | 1<br>1     | 0,999<br>2   |  |
| A0A4X1TNU2 | Q13247 | A0A4X1TTZ9 | SRSF6     | Serine/arginine-rich splicing factor 6                   | 1,944<br>3 | 0,032<br>8 | up | 1,1<br>2   | 0,715<br>6   |  |
| A0A4X1T3H7 | O14994 | F1SPS2     | SYN3      | Synapsin-3                                               | 1,526<br>9 | 0,005<br>3 | up | 1,1<br>8   | 0,250<br>6   |  |
| A0A480IXS3 | Q3LXA3 | F1RKQ4     | TKFC      | Triokinase/FMN cyclase                                   | 1,692<br>5 | 0,002<br>6 | up | 1,0<br>7   | 0,667<br>8   |  |
| A0A480S340 | Q3LXA3 | F1RKQ4     | TKFC      | Triokinase/FMN cyclase isoform b                         | 1,622      | 0,002<br>9 | up | 0,8<br>6   | 0,306<br>9   |  |
| A0A287AGM1 | Q9H330 | F1SP25     | TMEM245   | Transmembrane protein 245                                | 1,837<br>2 | 0,020<br>8 | up | 0,8<br>5   | 0,541<br>7   |  |
| A0A4X1TDU5 | Q6ZMR5 | A0A287BEC5 | TMPRSS11A | Transmembrane protease serine                            | 1,799<br>5 | 0,018<br>4 | up | 1,1<br>1,1 | 0,699<br>6   |  |
| A0A4X1UJK3 | Q9H1E5 | I3LB23     | TMX4      | Thioredoxin domain-containing protein                    | 1,545<br>2 | 0,015      | up | 1,1<br>6   | 0,384        |  |
| A0A5G2QZ59 | Q5T0D9 | F1RJA8     | TPRG1L    | Tumor protein p63 regulated 1 like                       | 1,688<br>4 | 0,020<br>6 | up | 1,2<br>6   | 0,299<br>4   |  |
| A0A4X1SDS7 | Q9C026 | F1SFF7     | TRIM9     | E3 ubiquitin-protein ligase TRIM9                        | 1,822<br>8 | 0,035<br>5 | up | 0,7<br>1   | 0,239<br>7   |  |
| A0A5G2QE60 | E7EWD5 | P80220     | TSC22D3   | TSC22 domain family protein 3                            | 1,914<br>9 | 0,016<br>2 | up | 0,9<br>5   | 0,848<br>6   |  |

|            |        |            |         |                                                             |            |            |    |          |            |       |
|------------|--------|------------|---------|-------------------------------------------------------------|------------|------------|----|----------|------------|-------|
| A0A480UBM5 | Q71U36 | P02550     | TUBA1A  | Tubulin alpha-1A chain                                      | 1,556<br>7 | 0,037<br>5 | up | 0,8<br>2 | 0,364<br>4 |       |
| A0A4X1URM2 | Q9NNW7 | F1RHN4     | TXNRD2  | Thioredoxin reductase 2                                     | 1,654<br>9 | 0,009<br>3 | up | 0,8<br>4 | 0,345<br>1 |       |
| A0A5G2R434 | Q9NNW7 | F1RHN4     | TXNRD2  | Thioredoxin-disulfide reductase                             | 2,267<br>6 | 0,008<br>7 | up | 0,9<br>5 | 0,862<br>3 |       |
| A0A286ZRI2 | Q92890 | F1RK61     | UFD1    | Ubiquitin recognition factor in ER associated degradation 1 | 1,591<br>3 | 0,018<br>5 | up |          | 0,996<br>4 |       |
| A0A5G2RB53 | Q92890 | F1RK61     | UFD1    | Ubiquitin recognition factor in ER associated degradation 1 | 1,768<br>8 | 0,048<br>6 | up | 0,7<br>6 |            | 0,343 |
| A0A480IWZ9 | Q8N1B4 | F1RZT5     | VPS52   | Vacuolar protein sorting-associated protein 52 homolog      | 1,619<br>6 | 0,041<br>4 | up | 1,1<br>8 |            | 0,492 |
| A0A480U566 | Q9H1Z4 | I3LPL0     | WDR13   | WD repeat-containing protein 13 isoform X1                  | 1,599<br>2 | 0,023<br>5 | up | 0,9<br>3 | 0,713<br>1 |       |
| K7GNH1     | Q9Y484 | K7GNH1     | WDR45   | WD repeat domain phosphoinositide-interacting protein 4     | 1,572<br>5 | 0,033<br>5 | up |          | 0,645<br>4 |       |
| A0A287A6F5 | Q8N4Q0 | A0A287A6F5 | ZADH2   | Prostaglandin reductase 3 isoform 1                         | 2,016<br>2 | 0,000<br>4 | up | 1,0<br>8 |            | 0,655 |
| I3LGD9     | O00468 | I3LGD9     | AGRN    | Agrin                                                       | 1,066<br>4 | 0,717<br>3 |    | 0,6<br>7 | 0,041<br>3 | down  |
| A0A5G2R290 | P31751 | G9BWQ2     | AKT2    | RAC-beta serine/threonine-protein kinase                    | 0,868<br>2 | 0,416<br>3 |    | 0,6<br>4 | 0,025      | down  |
| A0A4X1UHV7 | P47895 | F1SR94     | ALDH1A3 | Aldehyde dehydrogenase family 1 member A3                   | 0,861<br>3 | 0,397<br>7 |    | 0,6<br>5 | 0,028<br>3 | down  |
| A0A5G2RC09 | O00203 | F1S2G1     | AP3B1   | AP-3 complex subunit beta                                   | 0,983<br>4 | 0,933<br>3 |    | 0,6      | 0,027      | down  |
| A0A4X1TEA2 | P07741 | F1S6K5     | APRT    | Adenine phosphoribosyltransferase                           | 1,114<br>5 | 0,597<br>3 |    | 0,6<br>2 | 0,038<br>7 | down  |

|            |            |            |             |                                                                          |            |            |  |          |            |      |
|------------|------------|------------|-------------|--------------------------------------------------------------------------|------------|------------|--|----------|------------|------|
| A0A4X1SNI5 | Q17R89     | F1S549     | ARHGAP44    | Rho GTPase activating protein 44                                         | 0,903<br>7 | 0,626<br>8 |  | 0,6<br>2 | 0,042<br>1 | down |
| A0A4X1SU43 | O95817     | F1S415     | BAG3        | BAG family molecular chaperone regulator 3                               | 0,822<br>1 | 0,204<br>8 |  | 0,6<br>4 | 0,011<br>2 | down |
| A0A5G2QBS9 | P15056     | F1SRQ1     | BRAF        | B-Raf proto-oncogene, serine/threonine kinase                            | 1,106<br>5 | 0,681<br>8 |  | 0,5<br>8 | 0,046<br>4 | down |
| I3LDN0     | Q8IYJ2     | I3LDN0     | C10H10orf67 | Chromosome 10 C10orf67 homolog                                           | 0,948<br>8 | 0,777<br>5 |  | 0,6<br>3 | 0,028<br>4 | down |
| A0A5G2QRL3 | Q86YS7     | F1SFI8     | C2CD5       | C2 calcium dependent domain containing 5                                 | 1,218<br>5 | 0,336<br>2 |  | 0,5<br>7 | 0,015      | down |
| A0A4X1SYE0 | P22748     | F1S1C3     | CA4         | Carbonate dehydratase IV                                                 | 0,895<br>6 | 0,516<br>6 |  | 0,5<br>9 | 0,007<br>9 | down |
| A0A4X1VHY6 | A0A2R8YEJ7 | A0A4X1VHY6 | CASK        | Peripheral plasma membrane protein CASK                                  | 0,851<br>1 | 0,329<br>4 |  | 0,6<br>7 | 0,027<br>7 | down |
| A2TNA7     | Q00535     | Q197W4     | CDK5        | Cyclin-dependent kinase 5 (Fragment)                                     | 1,122      | 0,479<br>4 |  | 0,6<br>1 | 0,009<br>3 | down |
| A5PF00     | P00751     | K7GPT9     | CFB         | C3/C5 convertase                                                         | 0,878<br>9 | 0,496      |  | 0,6<br>4 | 0,036<br>3 | down |
| A0A481B434 | P17540     | Q2HYU1     | CKMT2       | Creatine kinase                                                          | 1,031<br>8 | 0,889<br>8 |  | 0,5<br>6 | 0,023<br>7 | down |
| A0A480YJ16 | P02462     | M3V819     | COL4A1      | Collagen alpha-1(IV) chain isoform 1 preproprotein                       | 1,016<br>3 | 0,910<br>5 |  | 0,6<br>5 | 0,009<br>6 | down |
| A0A4X1WA40 | P61923     | F2Z5S7     | COPZ1       | Coatomer subunit zeta                                                    | 0,950<br>9 | 0,805<br>5 |  | 0,6<br>1 | 0,030<br>4 | down |
| A0A481D7D0 | Q7KZN9     | F1S8W1     | COX15       | Cytochrome c oxidase assembly protein COX15 homolog isoform 1 (Fragment) | 1,144<br>8 | 0,445<br>3 |  | 0,5<br>4 | 0,003<br>6 | down |
| A0A4X1UVX3 | P14406     | F1S4V0     | COX7A2      | Cytochrome c oxidase subunit 7A2, mitochondrial                          | 1,087<br>7 | 0,573<br>6 |  | 0,6<br>5 | 0,012      | down |



|            |        |            |          |                                           |            |            |  |          |            |      |
|------------|--------|------------|----------|-------------------------------------------|------------|------------|--|----------|------------|------|
| A0A287BRT8 | Q08257 | Q0MVN8     | CRYZ     | Quinone oxidoreductase                    | 0,930<br>2 | 0,762<br>3 |  | 0,4<br>9 | 0,010<br>8 | down |
| Q95KR0     | P04080 | Q29290     | CSTB     | Cystatin B (Fragment)                     | 0,964<br>8 | 0,839<br>2 |  | 0,4<br>9 | 0,001      | down |
| A0A4X1W3D2 | Q8WZ74 | F1SJF2     | CTTNBP2  | Cortactin-binding protein 2               | 1,230<br>9 | 0,279<br>3 |  | 0,6<br>5 | 0,039<br>2 | down |
| A0A480Z928 | P52429 | F1RSC5     | DGKE     | Diacylglycerol kinase epsilon             | 1,090<br>5 | 0,619<br>7 |  | 0,6<br>2 | 0,016<br>4 | down |
| A0A4X1UUC4 | Q8WW22 | F6PUU1     | DNAJA4   | DnaJ homolog subfamily A member 4         | 1,271<br>4 | 0,234      |  | 0,6<br>5 | 0,049<br>4 | down |
| F1SMM0     | Q7Z2K6 | F1SMM0     | ERMP1    | Endoplasmic reticulum metalloproteinase 1 | 1,109<br>2 | 0,627<br>5 |  | 0,6<br>2 | 0,044<br>2 | down |
| A0A287BFP9 | Q96EK7 | I3LUV2     | FAM120B  | Family with sequence similarity 120B      | 1,229<br>3 | 0,205<br>2 |  | 0,6<br>6 | 0,022<br>1 | down |
| F1RX36     | P02671 | F1RX36     | FGA      | Fibrinogen alpha chain                    | 0,871<br>1 | 0,169<br>3 |  | 0,6<br>5 | 0,000<br>6 | down |
| A0A480X0T9 | Q13045 | A0A287AT54 | FLII     | Protein flightless-1 homolog isoform 1    | 0,930<br>6 | 0,780<br>1 |  | 0,5<br>3 | 0,027<br>5 | down |
| A0A4X1VNG0 | P49448 | P42174     | GLUD1    | Glutamate dehydrogenase 1, mitochondrial  | 0,914<br>4 | 0,594<br>4 |  | 0,6<br>5 | 0,025<br>6 | down |
| A0A4X1W412 | P15586 | K9IVU5     | GNS      | N-acetylglucosamine-6-sulfatase           | 0,803<br>2 | 0,379<br>2 |  | 0,5<br>4 | 0,027<br>8 | down |
| A0A4X1T0S7 | P09211 | P80031     | GSTP1    | GST class-pi                              | 0,949<br>5 | 0,811<br>6 |  | 0,4<br>8 | 0,004<br>5 | down |
| A0A4X1U4D2 | Q8NBQ5 | I3L5K3     | HSD17B13 | Estradiol 17-beta-dehydrogenase 11        | 0,954<br>7 | 0,758<br>6 |  | 0,6      | 0,004<br>5 | down |
| A0A4X1UX13 | Q8NFR9 | A0A4X1UX13 | IL17RE   | Interleukin-17 receptor E                 | 0,995<br>9 | 0,991<br>4 |  | 0,4      | 0,034<br>1 | down |

|            |        |            |         |                                                            |            |            |  |          |            |      |
|------------|--------|------------|---------|------------------------------------------------------------|------------|------------|--|----------|------------|------|
| A0A4X1WB54 | Q13683 | A0A481B0D0 | ITGA2   | Integrin alpha-2                                           | 0,958<br>3 | 0,813<br>8 |  | 0,6<br>3 | 0,023<br>6 | down |
| A0A480NE93 | Q14643 | I3LHZ3     | ITPR1   | Inositol 1,4,5-trisphosphate receptor type 1 isoform       | 1,182<br>1 | 0,345<br>4 |  | 0,6<br>4 | 0,025<br>9 | down |
| A0A4X1UVT4 | Q9BVA0 | F1RF38     | KATNB1  | Katanin p80 WD40 repeat-containing subunit B1              | 1,156<br>4 | 0,468      |  | 0,6      | 0,024<br>6 | down |
| A0A287B836 | P13473 | F1RUC0     | LAMP2   | Lysosomal associated membrane protein 2                    | 1,340<br>9 | 0,159<br>8 |  | 0,5<br>9 | 0,022      | down |
| A0A5G2QCP8 | P46734 | K7GNK7     | MAP2K3  | Dual specificity mitogen-activated protein kinase kinase 3 | 1,123      | 0,596<br>9 |  | 0,5<br>7 | 0,025<br>5 | down |
| I3LSP1     | P50579 | I3LSP1     | METAP2  | Methionine aminopeptidase 2                                | 0,970<br>5 | 0,877<br>5 |  | 0,5<br>6 | 0,010<br>4 | down |
| A0A4X1W6X4 | Q9H8H3 | A0A287A6C1 | METTL7A | Methyltransferase-like protein 7A                          | 0,809<br>2 | 0,267      |  | 0,5<br>6 | 0,007<br>6 | down |
| A0A4X1U8A7 | Q7RTP6 | F1SHR1     | MICAL3  | F-actin monooxygenase                                      | 1,045<br>1 | 0,834<br>6 |  | 0,6<br>2 | 0,044<br>4 | down |
| A0A4X1T9M8 | P53602 | M3VH72     | MVD     | Diphosphomevalonate decarboxylase                          | 1,082<br>5 | 0,708<br>7 |  | 0,6      | 0,033      | down |
| A0A5S6I9M5 | P20592 | A7VK00     | MX2     | Interferon-induced GTP-binding protein Mx2                 | 1,189<br>5 | 0,388<br>7 |  | 0,5<br>2 | 0,006      | down |
| Q1WEZ8     | P03886 | O79874     | NADH1   | NADH-ubiquinone oxidoreductase chain 1                     | 0,967<br>9 | 0,875<br>6 |  | 0,5<br>5 | 0,014<br>4 | down |
| A0A481CVT6 | Q9NXR1 | I3L8G0     | NDE1    | Nuclear distribution protein nudE homolog 1                | 1,064<br>5 | 0,651<br>5 |  | 0,5<br>8 | 0,001<br>5 | down |
| A0A4X1TJL9 | P21359 | F1RJ58     | NF1     | Neurofibromin                                              | 0,980<br>3 | 0,902<br>6 |  | 0,6<br>5 | 0,022<br>4 | down |
| A0A4X1VGW0 | Q8N0W4 | A0A287BC42 | NLGN4X  | Neuroigin-4, X-linked                                      | 0,939<br>4 | 0,739      |  | 0,5<br>7 | 0,010<br>5 | down |

|            |        |            |         |                                                            |            |            |  |          |            |      |
|------------|--------|------------|---------|------------------------------------------------------------|------------|------------|--|----------|------------|------|
| A0A4X1TFG8 | P61916 | O97763     | NPC2    | NPC intracellular cholesterol transporter 2                | 0,982<br>1 | 0,946<br>3 |  | 0,5<br>1 | 0,025<br>7 | down |
| A0A4X1WCA6 | Q9ULB1 | I3L8T0     | NRXN1   | Neurexin-1                                                 | 0,991      | 0,961<br>8 |  | 0,6<br>2 | 0,027<br>6 | down |
| A0A286ZUG8 | P52948 | F1SUZ2     | NUP98   | Nuclear pore complex protein Nup96                         | 1,062<br>7 | 0,677<br>9 |  | 0,6<br>5 | 0,010<br>6 | down |
| A0A5G2QZ66 | Q9HBI1 | F1SJU4     | PARVB   | Parvin beta                                                | 1,214<br>1 | 0,353<br>2 |  | 0,6<br>7 | 0,027<br>7 | down |
| F1S3G5     | Q13526 | I3LLH5     | PIN1    | Peptidyl-prolyl cis-trans isomerase                        | 0,899<br>2 | 0,661<br>7 |  | 0,4<br>9 | 0,011<br>1 | down |
| Q29582     | P14618 | F1SHM0     | PKM     | Pyruvate kinase                                            | 0,869<br>9 | 0,399      |  | 0,5<br>8 | 0,005<br>2 | down |
| A0A287B6R6 | Q4KWH8 | I3LFF0     | PLCH1   | Phosphoinositide phospholipase C                           | 0,818<br>4 | 0,453<br>6 |  | 0,5<br>4 | 0,041<br>6 | down |
| A0A4X1TVL0 | O60256 | F1SB18     | PRPSAP2 | Phosphoribosyl pyrophosphate synthase-associated protein 2 | 1,146<br>6 | 0,495<br>6 |  | 0,5<br>9 | 0,021<br>8 | down |
| A0A5G2QYV9 | P20337 | F1S6G3     | RAB3B   | RAB3B, member RAS oncogene family                          | 1,01       | 0,966<br>9 |  | 0,4<br>8 | 0,009<br>2 | down |
| A0A286ZVJ2 | P61224 | A0A286ZVJ2 | RAP1B   | Ras-related protein Rap-1b isoform 1                       | 1,341<br>7 | 0,213<br>7 |  | 0,5<br>8 | 0,037<br>7 | down |
| A0A4X1V9V8 | Q6JBY9 | F1S269     | RCSD1   | RCSD domain containing 1                                   | 0,630<br>4 | 0,214<br>4 |  | 0,4<br>3 | 0,038      | down |
| P62272     | P62269 | P62272     | RPS18   | 40S ribosomal protein S18                                  | 0,933<br>3 | 0,788      |  | 0,5<br>6 | 0,043<br>5 | down |
| Q29308     | P39019 | Q29308     | RPS19   | 40S ribosomal protein S19                                  | 1,081<br>1 | 0,682<br>7 |  | 0,6      | 0,018<br>2 | down |
| A0A4X1U5L3 | P10523 | P79260     | SAG     | S-arrestin                                                 | 0,798<br>3 | 0,238<br>4 |  | 0,6<br>4 | 0,037<br>5 | down |

|            |        |            |         |                                             |            |            |  |          |            |      |
|------------|--------|------------|---------|---------------------------------------------|------------|------------|--|----------|------------|------|
| A0A480TTT7 | Q15858 | F1S1Y7     | SCN9A   | Sodium channel protein type 9 subunit alpha | 1,125<br>4 | 0,465      |  | 0,6      | 0,006<br>6 | down |
| F1RT28     | Q9UGP8 | F1RT28     | SEC63   | J domain-containing protein                 | 0,918<br>6 | 0,767<br>3 |  | 0,4<br>9 | 0,027<br>6 | down |
| A0A286ZI11 | E9PFN4 | F1RRH2     | SLC4A7  | Anion exchange protein                      | 1,116<br>1 | 0,596      |  | 0,6<br>2 | 0,042<br>6 | down |
| A0A4X1V3P0 | O00161 | A0A4X1V3P0 | SNAP23  | Synaptosome associated protein 23           | 0,909<br>9 | 0,665<br>1 |  | 0,5<br>9 | 0,034<br>1 | down |
| A0A4X1U4N7 | Q14515 | F1RW32     | SPARCL1 | SPARC like 1                                | 1,056<br>3 | 0,804<br>2 |  | 0,5<br>9 | 0,032      | down |
| F1SNC1     | Q9C093 | Q2IA00     | SPEF2   | Sperm flagellar protein 2                   | 1,071<br>2 | 0,724<br>6 |  | 0,5<br>8 | 0,015<br>2 | down |
| A0A4X1VHD8 | P31948 | I3LNG8     | STIP1   | Stress induced phosphoprotein 1             | 1,301      | 0,429<br>4 |  | 0,4<br>6 | 0,035<br>2 | down |
| A0A4X1VGE1 | P31948 | I3LNG8     | STIP1   | Stress induced phosphoprotein 1             | 1,301      | 0,429<br>4 |  | 0,4<br>6 | 0,035<br>2 | down |
| A0A287B141 | Q96SI9 | F1SKU5     | STRBP   | Spermatid perinuclear RNA-binding protein   | 0,88       | 0,437<br>7 |  | 0,5<br>9 | 0,006<br>9 | down |
| C7S2Z6     | P61956 | P61958     | SUMO2   | Small ubiquitin-related modifier            | 0,903<br>9 | 0,6        |  | 0,6      | 0,021      | down |
| A0A480W7Z5 | Q8NF91 | A0A480W7Z5 | SYNE1   | Nesprin-1                                   | 1,350<br>7 | 0,185<br>3 |  | 0,6      | 0,042<br>2 | down |
| A0A4X1U4Q1 | O14787 | F1SEX5     | TNPO2   | Transportin-2                               | 1,064<br>7 | 0,734<br>9 |  | 0,6<br>2 | 0,021<br>9 | down |
| A0A4X1UCK9 | O14787 | F1SEX5     | TNPO2   | Transportin-2                               | 0,691<br>7 | 0,060<br>9 |  | 0,4<br>9 | 0,001<br>8 | down |
| A0A287AXL5 | Q9Y5L0 | F1SMQ0     | TNPO3   | Transportin 3                               | 0,975<br>7 | 0,870<br>6 |  | 0,6<br>2 | 0,006<br>8 | down |

|            |        |        |         |                                                             |            |            |      |          |            |      |
|------------|--------|--------|---------|-------------------------------------------------------------|------------|------------|------|----------|------------|------|
| F1RPD2     | P22695 | F1RPD2 | UQCRC2  | Cytochrome b-c1 complex subunit 2, mitochondrial            | 0,779<br>1 | 0,325<br>9 |      | 0,5<br>4 | 0,030<br>7 | down |
| A0A5G2QXB6 | Q9Y484 | K7GNH1 | WDR45   | WD repeat domain phosphoinositide-interacting protein 4     | 1,158<br>8 | 0,432      |      | 0,6<br>4 | 0,031<br>7 | down |
| A0A4X1WD73 | O00471 | F1SSM0 | EXOC5   | Exocyst complex component 5                                 | 0,624<br>8 | 0,044<br>9 | down | 0,6<br>1 | 0,043<br>1 | down |
| I3LIX0     | Q08379 | I3LIX0 | GOLGA2  | Golgin subfamily A member 2                                 | 0,627<br>1 | 0,010<br>6 | down | 0,5<br>7 | 0,023      | down |
| A0A5G2R265 | Q16773 | F1RR62 | KYAT1   | Kynurenine--oxoglutarate transaminase 1                     | 0,577      | 0,019<br>9 | down | 0,5<br>5 | 0,004<br>2 | down |
| A0A4X1ULI8 | O00214 | F1RGZ0 | LGALS8  | Galectin                                                    | 0,610<br>4 | 0,016<br>2 | down | 0,5<br>6 | 0,020<br>1 | down |
| A0A4X1SZ93 | Q9NUP9 | F2Z5M5 | LIN7C   | Protein lin-7 homolog C                                     | 0,644<br>4 | 0,014<br>7 | down | 0,5<br>1 | 0,032<br>5 | down |
| A0A4X1VX77 | O43920 | F1SV23 | NDUFS5  | Complex I-15 kDa                                            | 0,660<br>8 | 0,026<br>3 | down | 0,6<br>6 | 0,034<br>7 | down |
| I3LEB7     | Q7Z5L7 | I3LEB7 | PODN    | Podocan                                                     | 0,623<br>9 | 0,037<br>6 | down | 0,5<br>5 | 0,015<br>2 | down |
| A0A287APM1 | Q8IX01 | I3LFJ5 | SUGP2   | SURP and G-patch domain containing 2                        | 0,585<br>2 | 0,011<br>7 | down | 0,6<br>5 | 0,023<br>4 | down |
| F1RH13     | Q9BQG1 | F1RH13 | SYT3    | dolichyl-diphosphooligosaccharide--protein glycotransferase | 0,587<br>8 | 0,029<br>1 | down | 0,5<br>8 | 0,035<br>8 | down |
| A0A4X1VM20 | O43307 | F1RTP2 | ARHGEF9 | Collybistin                                                 | 1,763<br>1 | 0,014<br>7 | up   | 0,4<br>7 | 0,026<br>4 | down |
| A0A4X1UET6 | Q9GZY4 | I3LR62 | COA1    | Cytochrome c oxidase assembly factor 1 homolog              | 1,584<br>2 | 0,029<br>7 | up   | 0,6<br>3 | 0,005<br>6 | down |
| A0A5G2RIY7 | Q99627 | F1SM07 | COPS8   | COP9 signalosome complex subunit 8                          | 1,618<br>7 | 0,040<br>2 | up   | 0,4<br>8 | 0,023<br>4 | down |

|            |        |            |        |                                                                                  |            |            |    |          |            |      |
|------------|--------|------------|--------|----------------------------------------------------------------------------------|------------|------------|----|----------|------------|------|
| F1SNT8     | Q14203 | F1SNT8     | DCTN1  | Dynactin subunit 1                                                               | 1,831<br>5 | 0,036<br>4 | up | 0,6<br>4 | 0,023<br>2 | down |
| A0A286ZL35 | Q86UW8 | A0A286ZL35 | HAPLN4 | Hyaluronan and proteoglycan link protein 4                                       | 1,545<br>8 | 0,048<br>6 | up | 0,6<br>3 | 0,045<br>4 | down |
| A0A480XZ08 | Q6P996 | A0A287B2K7 | PDXDC1 | Pyridoxal-dependent decarboxylase domain-containing protein 1                    | 1,593<br>1 | 0,011<br>5 | up | 0,5<br>5 | 0,020<br>7 | down |
| A0A5G2QMU5 | Q8NBX0 | F1S8P1     | SCCPDH | Saccharopine dehydrogenase-like oxidoreductase                                   | 1,594<br>5 | 0,037      | up | 0,5<br>7 | 0,017<br>9 | down |
| A0A481AII0 | Q6JQN1 | F1RL48     | ACAD10 | Acyl-CoA dehydrogenase family member 10                                          | 0,886<br>3 | 0,621<br>8 |    |          | 0,013<br>8 | up   |
| A0A286ZSR3 | Q15067 | F1RVZ1     | ACOX1  | Acyl-coenzyme A oxidase                                                          | 1,217<br>3 | 0,270<br>1 |    | 1,5<br>8 | 0,022<br>9 | up   |
| A0A480V7K8 | O00116 | I3LM15     | AGPS   | Alkylglycerone-phosphate synthase                                                | 1,106<br>4 | 0,616<br>1 |    | 2,2<br>4 | 0,001<br>2 | up   |
| A0A287B6G6 | O00468 | I3LGD9     | AGRN   | Agrin                                                                            | 1,256<br>2 | 0,257<br>8 |    | 1,6<br>1 | 0,032<br>4 | up   |
| A0A5G2QKQ8 | P54819 | A0A5G2QKQ8 | AK2    | Adenylate kinase 2, mitochondrial                                                | 0,999<br>7 | 0,998<br>6 |    | 1,5<br>7 | 0,023<br>3 | up   |
| A0A5G2R903 | Q8NEU8 | F6Q7B0     | APPL2  | Adaptor protein, phosphotyrosine interacting with PH domain and leucine zipper 2 | 1,234<br>7 | 0,356      |    | 1,6<br>4 | 0,049<br>8 | up   |
| A0A286ZTA6 | P15289 | A0A286ZTA6 | ARSA   | Arylsulfatase A                                                                  | 1,201<br>3 | 0,210<br>7 |    | 1,5<br>5 | 0,009<br>4 | up   |
| A0A4X1SV97 | Q9NT62 | F1SLS7     | ATG3   | Autophagy related 3                                                              | 1,156<br>6 | 0,507<br>9 |    | 1,7<br>9 | 0,020<br>2 | up   |
| A0A5G2Q8U4 | Q9Y4P1 | D7RA22     | ATG4B  | Cysteine protease                                                                | 0,973      | 0,907<br>5 |    | 1,6<br>9 | 0,046<br>8 | up   |
| F1SMF9     | O75947 | F1SMF9     | ATP5PD | ATP synthase subunit d, mitochondrial                                            | 1,213<br>1 | 0,377      |    | 1,7<br>6 | 0,022<br>1 | up   |

|            |        |            |        |                                                     |            |            |  |          |            |    |
|------------|--------|------------|--------|-----------------------------------------------------|------------|------------|--|----------|------------|----|
| A0A287AKI0 | Q9NYF8 | F1S684     | BCLAF1 | BCL2 associated transcription factor 1              | 0,783<br>6 | 0,279<br>7 |  | 1,7<br>1 | 0,033<br>2 | up |
| F1SQF8     | Q14012 | F1SQF8     | CAMK1  | Calcium/calmodulin dependent protein kinase I       | 1,129<br>2 | 0,517<br>1 |  | 1,6<br>1 | 0,027<br>1 | up |
| B5L0Y3     | P20810 | P12675     | CAST   | Calpastatin                                         | 1,028<br>3 | 0,874<br>7 |  | 1,7<br>6 | 0,006<br>7 | up |
| A0A4X1VEM1 | O43303 | I3LAA1     | CCP110 | Centriolar coiled-coil protein 110                  | 1,532<br>4 | 0,134<br>9 |  | 2,1<br>2 | 0,017<br>8 | up |
| A0A481BMX2 | Q9HCU4 | A0A287AEM7 | CELSR2 | Cadherin EGF LAG seven-pass G-type receptor 2       | 0,846<br>9 | 0,349<br>6 |  | 1,5<br>1 | 0,038<br>6 | up |
| A0A4X1VKX5 | Q99807 | A0A4X1VKX5 | COQ7   | 5-demethoxyubiquinone hydroxylase, mitochondrial    | 0,856<br>9 | 0,525<br>1 |  | 1,7<br>5 | 0,039<br>2 | up |
| A0A5G2QL31 | P14854 | A0A5G2QL31 | COX6B1 | Cytochrome c oxidase subunit 6B1                    | 1,222<br>6 | 0,288<br>9 |  | 1,7<br>1 | 0,014<br>2 | up |
| A0A5G2QHM6 | Q86T65 | F1RVQ5     | DAAM2  | Dishevelled associated activator of morphogenesis 2 | 1,009<br>6 | 0,964<br>2 |  | 1,6<br>8 | 0,031<br>7 | up |
| A0A0J9X295 | Q13561 | F1SKF9     | DCTN2  | Dynactin subunit 2                                  | 0,999<br>2 | 0,997<br>2 |  | 1,8<br>1 | 0,019<br>1 | up |
| A0A4X1VR28 | Q92841 | F1SKQ0     | DDX17  | Probable ATP-dependent RNA helicase DDX17           | 1,132<br>2 | 0,662<br>4 |  | 2,0<br>5 | 0,025<br>9 | up |
| A0A4X1W5L2 | Q8NF50 | M3TYM9     | DOCK8  | Dedicator of cytokinesis protein 8                  | 0,883<br>4 | 0,541<br>4 |  | 1,6<br>9 | 0,022<br>5 | up |
| A0A5K1U3Q4 | Q6V1X1 | K7GN07     | DPP8   | Dipeptidyl peptidase 8                              | 0,965<br>8 | 0,899<br>7 |  | 1,9<br>1 | 0,037<br>1 | up |
| A0A480JST9 | O95163 | F1SP27     | ELP1   | Elongator complex protein 1                         | 0,99       | 0,948<br>7 |  | 1,5<br>9 | 0,010<br>7 | up |
| A0A481DE00 | Q96RT1 | F1SKS3     | ERBIN  | Erbin isoform 2                                     | 1,036<br>2 | 0,827<br>4 |  | 1,5<br>5 | 0,019      | up |

|                |        |                |         |                                                   |            |            |  |            |                |    |
|----------------|--------|----------------|---------|---------------------------------------------------|------------|------------|--|------------|----------------|----|
| A0A5G2RGJ1     | Q9Y4F1 | I3LEG0         | FARP1   | FERM, ARH/RhoGEF and pleckstrin domain protein 1  | 0,794<br>6 | 0,235<br>7 |  | 1,6<br>1   | 0,028<br>1     | up |
| B3GLY4         | Q6P1M0 | B3GLY4         | FATP4   | Fatty acid transport protein 4 (Fragment)         | 1,028<br>4 | 0,883<br>7 |  | 1,6<br>2   | 0,026<br>1     | up |
| A0A5G2QUW<br>9 | Q96ME1 | A0A5G2QUW<br>9 | FBXL18  | F-box and leucine rich repeat protein 18          | 0,631<br>8 | 0,149<br>8 |  | 2,4<br>9   | 0,011<br>4     | up |
| A0A480VVI3     | O94952 | F1RKE9         | FBXO21  | F-box only protein 21                             |            | 0,418<br>3 |  | 1,9<br>6   | 0,016<br>1     | up |
| A0A480K4A9     | Q13045 | A0A287AT54     | FLII    | Protein flightless-1 homolog isoform 1 (Fragment) | 1,474<br>3 | 0,140<br>6 |  | 1,9<br>5   | 0,021<br>8     | up |
| A0A4X1W3V6     | Q5CZC0 | A0A4X1W3V6     | FSIP2   | Fibrous sheath-interacting protein 2              | 0,979<br>3 | 0,925<br>4 |  | 1,6<br>7   | 0,040<br>8     | up |
| P19130         | P02794 | P19130         | FTH1    | Ferritin heavy chain                              | 1,011<br>9 | 0,944<br>6 |  | 1,6<br>5   | 0,011<br>9     | up |
| A0A5G2R0N1     | Q86UW8 | A0A5G2R0N1     | HAPLN4  | Hyaluronan and proteoglycan link protein 4        | 1,386<br>5 | 0,142<br>4 |  | 1,8<br>8   | 0,011<br>7     | up |
| A0A4X1V6U1     | P26583 | P17741         | HMGB2   | High mobility group protein B2                    | 1,220<br>6 | 0,320<br>1 |  | 1,6<br>1,6 | 0,035<br>0,035 | up |
| A0A4X1V9E7     | P09651 | F6Q9I4         | HNRNPA1 | Heterogeneous nuclear ribonucleoprotein A1        | 0,843<br>7 | 0,388<br>5 |  | 1,5<br>9   | 0,034<br>8     | up |
| A0A480PH82     | O43719 | I3LC46         | HTATSF1 | HIV Tat-specific factor 1                         | 1,023<br>5 | 0,936<br>9 |  | 1,9<br>3   | 0,046<br>2     | up |
| A0A4X1UGM9     | Q9UPP2 | F1SK81         | IQSEC3  | IQ motif and SEC7 domain-containing protein 3     |            | 0,200<br>2 |  | 1,5<br>6   | 0,018<br>8     | up |
| A0A481B0D0     | Q13683 | A0A481B0D0     | ITGA7   | Integrin alpha-7                                  | 0,915<br>6 | 0,706<br>7 |  | 1,9<br>5   | 0,013<br>5     | up |
| A0A480TCT8     | Q15046 | F1S458         | KARS1   | Lysine--tRNA ligase                               | 0,846<br>2 | 0,325<br>8 |  | 1,5<br>3   | 0,025<br>0,025 | up |



|            |        |            |                  |                                                          |            |            |  |            |            |    |
|------------|--------|------------|------------------|----------------------------------------------------------|------------|------------|--|------------|------------|----|
| A0A287AT80 | B7ZMF5 | F1S2E7     | KCNMA1           | BK channel                                               | 1,365<br>4 | 0,134<br>4 |  | 1,7<br>2   | 0,019      | up |
| A0A4X1UAA8 | P32455 | F1S4D7     | LOC10052366<br>8 | GB1/RHD3-type G domain-containing protein                | 0,993<br>9 | 0,971<br>9 |  | 1,6<br>6   | 0,012<br>1 | up |
| A0A5G2QZZ8 | Q9BQ69 | A0A5G2QZZ8 | MACROD1          | Mono-ADP ribosylhydrolase 1                              | 0,811<br>1 | 0,292<br>7 |  | 1,6<br>1,6 | 0,034<br>2 | up |
| A0A287ANJ5 | Q6DN14 | I3LFJ9     | MCTP1            | Multiple C2 and transmembrane domain containing 1        | 1,200<br>3 | 0,366<br>6 |  | 1,5<br>9   | 0,040<br>4 | up |
| I3LRY9     | Q9BUU2 | I3LRY9     | METTL22          | Methyltransferase like 22                                | 1,060<br>6 | 0,729<br>4 |  | 1,5<br>5   | 0,024<br>4 | up |
| A0A480W0I3 | Q7RTP6 | F1SHR1     | MICAL3           | F-actin monooxygenase                                    | 0,692<br>3 | 0,179      |  | 1,8<br>9   | 0,034<br>3 | up |
| A0A287A0G6 | Q96T76 | F1S8Y2     | MMS19            | MMS19 nucleotide excision repair protein                 | 1,567<br>2 | 0,111<br>2 |  | 2,2        | 0,012<br>2 | up |
| A0A4X1W511 | Q7Z3U7 | A0A4X1W511 | MON2             | Protein MON2 homolog                                     | 0,817<br>7 | 0,374<br>2 |  | 1,7        | 0,034<br>9 | up |
| A0A287BEB3 | Q9P2K5 | F1SN63     | MYEF2            | Myelin expression factor 2                               | 0,922<br>2 | 0,660<br>6 |  | 1,6        | 0,024<br>2 | up |
| Q9G7T5     | P03886 | O79874     | NADH1            | NADH-ubiquinone oxidoreductase chain 1                   | 1,085<br>9 | 0,804<br>4 |  | 2,1<br>6   | 0,039<br>3 | up |
| A0A287ARH5 | P20929 | F1SHX0     | NEB              | Nebulin                                                  | 1,178      | 0,418<br>2 |  | 1,7<br>9   | 0,012<br>4 | up |
| A0A4X1TN78 | O76041 | F1RVG6     | NEBL             | Nebulette                                                | 0,878<br>1 | 0,376<br>9 |  | 1,5<br>6   | 0,008<br>9 | up |
| A0A4X1TG56 | P46934 | I3L6R7     | NEDD4            | HECT-type E3 ubiquitin transferase                       | 1,099<br>2 | 0,530<br>4 |  | 1,5<br>6   | 0,011<br>1 | up |
| A0A480H9T2 | Q14982 | A0A480IG74 | OPCML            | Opioid-binding protein/cell adhesion molecule isoform X1 | 0,994<br>7 | 0,977<br>1 |  | 1,6<br>8   | 0,015<br>7 | up |

|                |        |            |         |                                                                  |            |            |  |          |            |    |
|----------------|--------|------------|---------|------------------------------------------------------------------|------------|------------|--|----------|------------|----|
| A0A287AEY8     | Q9Y3D7 | F1RK50     | PAM16   | Mitochondrial import inner membrane translocase subunit TIM16    | 1,173<br>9 | 0,417<br>6 |  | 1,5<br>9 | 0,036<br>3 | up |
| A0A480ECQ3     | O60245 | A0A480ECQ3 | PCDH7   | Protocadherin-7 isoform d                                        | 0,957<br>3 | 0,728<br>4 |  | 1,5<br>1 | 0,005<br>6 | up |
| Q29305         | P13667 | F1SAD9     | PDIA4   | Protein disulfide-isomerase                                      | 0,798<br>5 | 0,266<br>2 |  | 1,6<br>9 | 0,020<br>7 | up |
| A0A5G2QFU3     | Q4KWH8 | I3LFF0     | PLCH1   | Phosphoinositide phospholipase C                                 | 0,848<br>5 | 0,475<br>5 |  | 2,3<br>6 | 0,002      | up |
| F1SUT1         | Q9UF11 | F1SUT1     | PLEKHB1 | Pleckstrin homology domain containing B1                         | 1,116<br>4 | 0,381<br>7 |  | 1,5<br>4 | 0,003<br>9 | up |
| A0A286ZQN2     |        | I3LEB7     | PODN    | Podocan                                                          | 0,700<br>3 | 0,235<br>4 |  | 1,9<br>9 | 0,037<br>8 | up |
| A0A286ZL42     | P62136 | Q2EHH8     | PPP1CA  | Serine/threonine-protein phosphatase PP1-alpha catalytic subunit | 1,042<br>6 | 0,781<br>1 |  | 1,5<br>6 | 0,011<br>2 | up |
| F1RIY9         | P31321 | F1RIY9     | PRKAR1B | Protein kinase cAMP-dependent type I regulatory subunit beta     | 1,353<br>2 | 0,086<br>1 |  | 1,5<br>2 | 0,029<br>2 | up |
| Q5GA59         | P25786 | F2Z5L7     | PSMA1   | Proteasome subunit alpha type 1 (Fragment)                       | 1,024<br>8 | 0,923<br>4 |  | 1,8<br>4 | 0,034      | up |
| G3DRF8         | P28072 | F1RFV5     | PSMB6   | Proteasome subunit beta type-6                                   | 0,762<br>5 | 0,194<br>8 |  | 1,6<br>4 | 0,033<br>1 | up |
| A0A480PKE7     | P10586 | A0A480PKE7 | PTPRF   | Receptor-type tyrosine-protein phosphatase F isoform 6           | 0,927<br>2 | 0,685<br>3 |  | 1,5<br>5 | 0,035<br>6 | up |
| A0A287BTC4     | Q9NP72 | I3LC07     | RAB18   | Ras-related protein Rab-18                                       | 1,021      | 0,924<br>8 |  | 2,1      | 0,004<br>7 | up |
| A0A5G2QWM<br>5 | Q969Q5 | F1S3C2     | RAB24   | RAB24, member RAS oncogene family                                | 1,185<br>9 | 0,391<br>5 |  | 1,8<br>6 | 0,007<br>3 | up |
| A0A287B386     | P18621 | I3LT81     | RPL17   | 60S ribosomal protein L17                                        | 0,758<br>8 | 0,055<br>6 |  | 1,5<br>6 | 0,005<br>7 | up |

|                |        |            |         |                                                              |            |            |               |          |            |    |
|----------------|--------|------------|---------|--------------------------------------------------------------|------------|------------|---------------|----------|------------|----|
| A0A287A0E2     | Q9NR46 | I3LUB3     | SH3GLB2 | SH3 domain containing GRB2 like, endophilin B2               | 0,850<br>4 | 0,472<br>8 |               | 1,6<br>4 | 0,047<br>5 | up |
| F1RR85         | Q6P1M0 | F1RR85     | SLC27A4 | Long-chain fatty acid transport protein 4                    | 1,593<br>7 | 0,083<br>6 |               | 1,9<br>6 | 0,022<br>6 | up |
| A0A480JXS2     | O60271 | A0A480JXS2 | SPAG9   | C-Jun-amino-terminal kinase-interacting protein 4 isoform X1 | 1,026<br>9 | 0,875<br>4 |               | 1,5<br>8 | 0,019<br>2 | up |
| A4H2R5         | P09486 | P20112     | SPARC   | Osteonectin (Fragment)                                       | 1,286<br>4 | 0,117<br>5 |               |          | 0,021<br>4 | up |
| A0A5G2RJD9     | Q9C093 | Q2IA00     | SPEF2   | Sperm flagellar protein 2                                    | 0,666<br>2 | 0,050<br>9 |               | 1,5<br>8 | 0,039<br>1 | up |
| A0A4X1SJH8     | Q07955 | Q3YLA6     | SRSF1   | Serine/arginine-rich splicing factor 1                       | 1,469<br>7 | 0,029<br>4 |               | 1,5<br>8 | 0,016<br>3 | up |
| A0A4X1UF36     | Q8TCJ2 | F1RRF2     | STT3B   | Dolichyl-diphosphooligosaccharide--protein glycotransferase  | 1,083<br>8 | 0,774<br>1 |               | 1,8<br>5 | 0,049<br>8 | up |
| A0A5G2QVT2     | Q8WUH6 | A0A5G2QVT2 | TMEM263 | Transmembrane protein 263                                    |            | 0,665<br>6 |               |          | 0,033<br>9 | up |
| A0A287A351     | Q9HBF4 | F1S3L2     | ZFYVE1  | Zinc finger FYVE-type containing 1                           | 0,943<br>4 | 0,718<br>7 |               | 1,5<br>6 | 0,016<br>9 | up |
| A0A286ZSN0     | P25054 | D4PEB7     | APC     | APC regulator of WNT signaling pathway                       | 0,631<br>6 |            | 0,017<br>down | 1,7<br>5 | 0,016<br>6 | up |
| A0A4X1UH24     | O14983 | F1RFH9     | ATP2A1  | Calcium-transporting ATPase                                  | 0,538<br>6 | 0,046<br>1 | down          | 1,9<br>8 | 0,038<br>1 | up |
| A0A5S6GGN8     | Q9NQX7 | Q06AV4     | ITM2C   | Integral membrane protein 2C                                 | 0,523<br>1 | 0,014<br>7 | down          | 1,7<br>1 | 0,013<br>9 | up |
| A0A5G2QMV<br>1 | Q96L93 | I3LEQ5     | KIF16B  | Kinesin-like protein KIF16B                                  | 0,544<br>3 | 0,035<br>2 | down          | 1,5<br>2 | 0,042<br>8 | up |
| A0A287BBE4     | Q9BQG0 | F1RGP1     | MYBBP1A | MYB binding protein 1a                                       | 0,631<br>9 | 0,038<br>9 | down          | 1,7<br>1 | 0,048<br>5 | up |

|            |        |            |        |                                            |            |            |      |          |            |    |
|------------|--------|------------|--------|--------------------------------------------|------------|------------|------|----------|------------|----|
| I3L829     | Q8TAT6 | I3L829     | NPLOC4 | NPL4 homolog, ubiquitin recognition factor | 0,642<br>4 | 0,027      | down | 1,8<br>5 | 0,033<br>6 | up |
| A0A4X1VQE8 | Q99569 | F1RPT5     | PKP4   | Plakophilin 4                              | 0,574      | 0,005<br>4 | down | 2,4<br>5 | 0,008<br>1 | up |
| A0A480TRN1 | Q9UPN7 | F1RMN3     | PPP6R1 | Protein phosphatase 6 regulatory subunit 1 | 0,533<br>7 | 0,025<br>3 | down | 1,5<br>8 | 0,044<br>8 | up |
| A0A5G2RBG1 | P26599 | F1S6R7     | PTBP1  | Polypyrimidine tract-binding protein 1     | 0,640<br>7 | 0,036<br>4 | down | 1,6<br>7 | 0,037      | up |
| A0A4X1SIX3 | O95260 | F1SEH8     | ATE1   | Arginyl-tRNA--protein transferase 1        | 1,712<br>6 | 0,008      | up   | 2,3      | 0,005<br>7 | up |
| A0A287A7Q1 | O95319 | F1RUN0     | CELF2  | CUGBP Elav-like family member 2            | 2,237<br>4 | 0,014      | up   | 1,6<br>2 | 0,045<br>4 | up |
| A0A4X1UX60 | Q9H078 | A0A4X1UX60 | CLPB   | Caseinolytic peptidase B protein homolog   | 1,787<br>5 | 0,009<br>7 | up   | 1,6<br>7 | 0,04       | up |
| K7GSF4     | Q06787 | K7GNF4     | FMR1   | Synaptic functional regulator FMR1         | 1,983<br>3 | 0,002<br>5 | up   | 1,6<br>5 | 0,025<br>4 | up |
| A0A480M5N0 | Q08378 | F1RI72     | GOLGA3 | Golgin subfamily A member 3                | 1,517<br>2 | 0,040<br>1 | up   | 1,6<br>9 | 0,012<br>7 | up |
| A0A4X1W5L4 | P98160 | F1SU03     | HSPG2  | Heparan sulfate proteoglycan 2             | 2,564<br>7 | 0,008<br>5 | up   | 1,6<br>8 | 0,026<br>7 | up |
| A0A4X1TMN0 | K7ERN1 | F1SM37     | NEDD4L | HECT-type E3 ubiquitin transferase         | 2,023<br>3 | 0,024<br>6 | up   | 1,7<br>8 | 0,017<br>9 | up |
| A0A4X1TEY6 | Q15382 | F2Z5R2     | RHEB   | GTP-binding protein Rheb                   | 1,874<br>9 | 0,013<br>5 | up   | 1,9<br>6 | 0,032<br>5 | up |
| A0A287AN91 | Q6P3W7 | F1SQU2     | SCYL2  | SCY1 like pseudokinase 2                   | 1,500<br>3 | 0,017<br>9 | up   | 1,5<br>6 | 0,002<br>3 | up |
| A0A480V246 | Q13596 | I3LJ78     | SNX1   | Sorting nexin-1                            | 1,886<br>6 | 0,027<br>6 | up   | 1,7<br>3 | 0,037<br>7 | up |

|            |        |        |      |                 |       |       |    |     |       |    |
|------------|--------|--------|------|-----------------|-------|-------|----|-----|-------|----|
| A0A480V246 | Q13596 | I3LJ78 | SNX1 | Sorting nexin-1 | 1,886 | 0,027 |    | 1,7 | 0,037 |    |
|            |        |        |      |                 | 6     | 6     | up | 3   | 7     | up |

**Table S5.** Gene Ontology analysis of the response of NBW and LBW groups to an HFD.

Response of NBW and LBW animals to HFD: Comparison between GO categories in NBW and LBW groups: main categories from Panther have been selected and fold of enrichment indicated. Only positive (+)

## Biological Process

| NBW                                                              | Enrich-<br>ment | LBW                                                                   | Enrich-<br>ment |
|------------------------------------------------------------------|-----------------|-----------------------------------------------------------------------|-----------------|
| negative regulation of synaptic vesicle exocytosis (GO:2000301)  | 69.81           | negative regulation of mRNA splicing, via spliceosome (GO:0048025)    | 24.25           |
| regulation of synaptic vesicle cycle (GO:0098693)                | 38.79           | negative regulation of RNA splicing (GO:0033119)                      | 19.76           |
| regulation of neurotransmitter transport (GO:0051588)            | 7.83            | negative regulation of mRNA processing (GO:0050686)                   | 17.21           |
| oxidative phosphorylation (GO:0006119)                           | 7.21            | regulation of alternative mRNA splicing, via spliceosome (GO:0000381) | 16.01           |
| regulation of synapse organization (GO:0050807)                  | 5.54            | regulation of mRNA splicing, via spliceosome (GO:0048024)             | 12.43           |
| regulation of neurotransmitter levels (GO:0001505)               | 5.36            | post-Golgi vesicle-mediated transport (GO:0006892)                    | 9.90            |
| regulation of synapse structure or activity (GO:0050803)         | 5.36            | regulation of mRNA processing (GO:0050684)                            | 9.21            |
| synapse organization (GO:0050808)                                | 5.23            | regulation of RNA splicing (GO:0043484)                               | 8.54            |
| ATP metabolic process (GO:0046034)                               | 5.18            | Golgi vesicle transport (GO:0048193)                                  | 5.22            |
| energy derivation by oxidation of organic compounds (GO:0015980) | 4.75            | regulation of mRNA metabolic process (GO:1903311)                     | 4.77            |
| regulation of vesicle-mediated transport (GO:0060627)            | 3.96            | vesicle-mediated transport (GO:0016192)                               | 2.81            |
| intracellular protein transport (GO:0006886)                     | 3.72            | intracellular transport (GO:0046907)                                  | 2.40            |
| cell junction organization (GO:0034330)                          | 3.66            | cellular protein localization (GO:0034613)                            | 2.25            |
| protein localization to membrane (GO:0072657)                    | 3.50            | cellular macromolecule localization (GO:0070727)                      | 2.23            |
| intracellular transport (GO:0046907)                             | 3.17            | establishment of localization in cell (GO:0051649)                    | 2.11            |
| protein transport (GO:0015031)                                   | 3.05            | cellular localization (GO:0051641)                                    | 2.07            |
| establishment of protein localization (GO:0045184)               | 3.02            | regulation of molecular function (GO:0065009)                         | 1.81            |
| establishment of localization in cell (GO:0051649)               | 2.88            | transport (GO:0006810)                                                | 1.71            |
| cellular protein localization (GO:0034613)                       | 2.71            | establishment of localization (GO:0051234)                            | 1.66            |
| cellular macromolecule localization (GO:0070727)                 | 2.69            | localization (GO:0051179)                                             | 1.62            |
| nitrogen compound transport (GO:0071705)                         | 2.58            | cellular process (GO:0009987)                                         | 1.22            |
| central nervous system development (GO:0007417)                  | 2.55            | biological_process (GO:0008150)                                       | 1.13            |

|                                            |      |
|--------------------------------------------|------|
| cellular localization (GO:0051641)         | 2.47 |
| organic substance transport (GO:0071702)   | 2.35 |
| protein localization (GO:0008104)          | 2.33 |
| macromolecule localization (GO:0033036)    | 2.27 |
| transport (GO:0006810)                     | 2.08 |
| nervous system development (GO:0007399)    | 2.07 |
| establishment of localization (GO:0051234) | 2.02 |
| cellular component assembly (GO:0022607)   | 2.02 |

## Molecular Function

| NBW                                         | Enrichment | LBW                                                 | Enrichment |
|---------------------------------------------|------------|-----------------------------------------------------|------------|
| cadherin binding (GO:0045296)               | 3.96       | pre-mRNA binding (GO:0036002)                       | 16.42      |
| cell adhesion molecule binding (GO:0050839) | 3.68       | structural constituent of cytoskeleton (GO:0005200) | 7.18       |
| cytoskeletal protein binding (GO:0008092)   | 2.90       | cadherin binding (GO:0045296)                       | 4.96       |
| oxidoreductase activity (GO:0016491)        | 2.82       | actin binding (GO:0003779)                          | 4.48       |
| anion binding (GO:0043168)                  | 2.12       | cell adhesion molecule binding (GO:0050839)         | 4.37       |
| RNA binding (GO:0003723)                    | 2.07       | cytoskeletal protein binding (GO:0008092)           | 2.98       |
| nucleotide binding (GO:0000166)             | 1.98       | protein-containing complex binding (GO:0044877)     | 2.43       |
| nucleoside phosphate binding (GO:1901265)   | 1.98       | anion binding (GO:0043168)                          | 1.90       |
| small molecule binding (GO:0036094)         | 1.90       | protein binding (GO:0005515)                        | 1.21       |
| catalytic activity (GO:0003824)             | 1.53       | binding (GO:0005488)                                | 1.16       |
| protein binding (GO:0005515)                | 1.27       | molecular_function (GO:0003674)                     | 1.11       |
| binding (GO:0005488)                        | 1.18       |                                                     |            |
| molecular_function (GO:0003674)             | 1.11       |                                                     |            |

## Cellular Component

| NBW                                                   | Enrich-<br>ment | LBW                                                                        | En-<br>rich-<br>ment |
|-------------------------------------------------------|-----------------|----------------------------------------------------------------------------|----------------------|
| platelet alpha granule membrane (GO:0031092)          | 20.53           | UFD1-NPL4 complex (GO:0036501)                                             | > 100                |
| cytochrome complex (GO:0070069)                       | 11.35           | H zone (GO:0031673)                                                        | > 100                |
|                                                       |                 | endoplasmic reticulum-Golgi intermediate compartment membrane (GO:0033116) | 6.93                 |
| lysosomal lumen (GO:0043202)                          | 7.20            | ruffle membrane (GO:0032587)                                               | 6.47                 |
| basement membrane (GO:0005604)                        | 7.20            | exocytic vesicle (GO:0070382)                                              | 4.66                 |
| lipid droplet (GO:0005811)                            | 7.20            | postsynaptic density (GO:0014069)                                          | 4.46                 |
| respirasome (GO:0070469)                              | 7.05            | extrinsic component of membrane (GO:0019898)                               | 4.43                 |
| Schaffer collateral - CA1 synapse (GO:0098685)        | 7.01            | asymmetric synapse (GO:0032279)                                            | 4.39                 |
| respiratory chain complex (GO:0098803)                | 6.54            | postsynaptic specialization (GO:0099572)                                   | 4.14                 |
| mitochondrial respirasome (GO:0005746)                | 6.54            | transport vesicle (GO:0030133)                                             | 4.09                 |
| glutamatergic synapse (GO:0098978)                    | 5.32            | neuron to neuron synapse (GO:0098984)                                      | 4.08                 |
| postsynaptic density (GO:0014069)                     | 4.86            | synaptic vesicle (GO:0008021)                                              | 4.07                 |
| asymmetric synapse (GO:0032279)                       | 4.79            | sarcomere (GO:0030017)                                                     | 4.03                 |
| neuron to neuron synapse (GO:0098984)                 | 4.77            | cell cortex (GO:0005938)                                                   | 3.65                 |
| postsynaptic specialization (GO:0099572)              | 4.51            | postsynapse (GO:0098794)                                                   | 3.33                 |
| postsynapse (GO:0098794)                              | 4.00            | actin cytoskeleton (GO:0015629)                                            | 3.31                 |
| secretory granule membrane (GO:0030667)               | 3.74            | cell leading edge (GO:0031252)                                             | 2.99                 |
| secretory granule lumen (GO:0034774)                  | 3.62            | synapse (GO:0045202)                                                       | 2.77                 |
| cytoplasmic vesicle lumen (GO:0060205)                | 3.59            | cell junction (GO:0030054)                                                 | 2.38                 |
| vesicle lumen (GO:0031983)                            | 3.57            | membrane protein complex (GO:0098796)                                      | 2.37                 |
| synapse (GO:0045202)                                  | 3.11            | Golgi apparatus (GO:0005794)                                               | 2.27                 |
| collagen-containing extracellular matrix (GO:0062023) | 3.00            | extracellular vesicle (GO:1903561)                                         | 2.17                 |
| secretory granule (GO:0030141)                        | 2.95            | extracellular organelle (GO:0043230)                                       | 2.16                 |
| secretory vesicle (GO:0099503)                        | 2.92            | extracellular membrane-bounded organelle (GO:0065010)                      | 2.16                 |
| extracellular exosome (GO:0070062)                    | 2.33            | extracellular exosome (GO:0070062)                                         | 2.14                 |
| extracellular vesicle (GO:1903561)                    | 2.31            | cell projection (GO:0042995)                                               | 2.03                 |
| extracellular organelle (GO:0043230)                  | 2.31            |                                                                            |                      |



|                                                       |      |                                                       |      |
|-------------------------------------------------------|------|-------------------------------------------------------|------|
| extracellular membrane-bounded organelle (GO:0065010) | 2.31 | vesicle (GO:0031982)                                  | 2.01 |
| cell junction (GO:0030054)                            | 2.27 | neuron projection (GO:0043005)                        | 1.99 |
| membrane protein complex (GO:0098796)                 | 2.05 | plasma membrane bounded cell projection (GO:0120025)  | 1.99 |
| cytoplasmic vesicle (GO:0031410)                      | 2.04 | cytoplasmic vesicle (GO:0031410)                      | 1.96 |
| intracellular vesicle (GO:0097708)                    | 2.04 | intracellular vesicle (GO:0097708)                    | 1.95 |
| plasma membrane bounded cell projection (GO:0120025)  | 2.01 | cytoskeleton (GO:0005856)                             | 1.86 |
| vesicle (GO:0031982)                                  | 1.98 | cytosol (GO:0005829)                                  | 1.78 |
| cell projection (GO:0042995)                          | 1.97 | endomembrane system (GO:0012505)                      | 1.76 |
| mitochondrion (GO:0005739)                            | 1.90 | organelle membrane (GO:0031090)                       | 1.58 |
| cytosol (GO:0005829)                                  | 1.83 | cytoplasm (GO:0005737)                                | 1.50 |
| extracellular space (GO:0005615)                      | 1.75 | membrane (GO:0016020)                                 | 1.35 |
| endomembrane system (GO:0012505)                      | 1.70 | intracellular membrane-bounded organelle (GO:0043231) | 1.31 |
| organelle membrane (GO:0031090)                       | 1.63 | membrane-bounded organelle (GO:0043227)               | 1.30 |
| extracellular region (GO:0005576)                     | 1.57 | intracellular organelle (GO:0043229)                  | 1.29 |
| protein-containing complex (GO:0032991)               | 1.54 | organelle (GO:0043226)                                | 1.29 |
| organelle lumen (GO:0043233)                          | 1.53 | intracellular anatomical structure (GO:0005622)       | 1.29 |
| intracellular organelle lumen (GO:0070013)            | 1.53 | cellular_component (GO:0005575)                       | 1.08 |
| membrane-enclosed lumen (GO:0031974)                  | 1.53 | cellular anatomical entity (GO:0110165)               | 1.08 |
| cytoplasm (GO:0005737)                                | 1.52 |                                                       |      |
| membrane (GO:0016020)                                 | 1.35 |                                                       |      |
| membrane-bounded organelle (GO:0043227)               | 1.31 |                                                       |      |
| intracellular membrane-bounded organelle (GO:0043231) | 1.31 |                                                       |      |
| organelle (GO:0043226)                                | 1.29 |                                                       |      |
| intracellular anatomical structure (GO:0005622)       | 1.29 |                                                       |      |
| intracellular organelle (GO:0043229)                  | 1.27 |                                                       |      |
| cellular anatomical entity (GO:0110165)               | 1.10 |                                                       |      |
| cellular_component (GO:0005575)                       | 1.09 |                                                       |      |

**Table S6.** KEGG pathway analysis of the response of NBW and LBW groups to an HFD.

**KEGG – NBW GROUP**

| METABOLISM AND SIGNAL TRANSDUCTION                                                            |
|-----------------------------------------------------------------------------------------------|
| • <a href="#">hsa01100 Metabolic pathways - Homo sapiens (human) (25)</a>                     |
| <a href="#">_hsa:10229 COQ7; coenzyme Q7, hydroxylase</a>                                     |
| <a href="#">_hsa:10476 ATP5PD; ATP synthase peripheral stalk subunit d</a>                    |
| <a href="#">_hsa:1160 CKMT2; creatine kinase, mitochondrial 2</a>                             |
| <a href="#">_hsa:1340 COX6B1; cytochrome c oxidase subunit 6B1</a>                            |
| <a href="#">_hsa:1347 COX7A2; cytochrome c oxidase subunit 7A2</a>                            |
| <a href="#">_hsa:1355 COX15; cytochrome c oxidase assembly homolog COX15</a>                  |
| <a href="#">_hsa:201595 STT3B; STT3 oligosaccharyltransferase complex catalytic subunit B</a> |
| <a href="#">_hsa:204 AK2; adenylate kinase 2</a>                                              |
| <a href="#">_hsa:220 ALDH1A3; aldehyde dehydrogenase 1 family member A3</a>                   |
| <a href="#">_hsa:23007 PLCH1; phospholipase C eta 1</a>                                       |
| <a href="#">_hsa:2747 GLUD2; glutamate dehydrogenase 2</a>                                    |
| <a href="#">_hsa:2799 GNS; glucosamine (N-acetyl)-6-sulfatase</a>                             |
| <a href="#">_hsa:2950 GSTP1; glutathione S-transferase pi 1</a>                               |
| <a href="#">_hsa:353 APRT; adenine phosphoribosyltransferase</a>                              |
| <a href="#">_hsa:410 ARSA; arylsulfatase A</a>                                                |
| <a href="#">_hsa:4535 ND1; NADH dehydrogenase subunit 1</a>                                   |
| <a href="#">_hsa:4597 MVD; mevalonate diphosphate decarboxylase</a>                           |
| <a href="#">_hsa:4725 NDUFS5; NADH:ubiquinone oxidoreductase subunit S5</a>                   |
| <a href="#">_hsa:51 ACOX1; acyl-CoA oxidase 1</a>                                             |
| <a href="#">_hsa:5315 PKM; pyruvate kinase M1/2</a>                                           |
| <a href="#">_hsa:7385 UQCRC2; ubiquinol-cytochrome c reductase core protein 2</a>             |

**KEGG – LBW GROUP**

| METABOLISM AND SIGNAL TRANSDUCTION                                                                                                      |
|-----------------------------------------------------------------------------------------------------------------------------------------|
| • <a href="#">hsa01100 Metabolic pathways - Homo sapiens (human) (31)</a>                                                               |
| <a href="#">_hsa:102724560 CBS; cystathionine beta-synthase like</a>                                                                    |
| <a href="#">_hsa:10423 CDIPT; CDP-diacylglycerol--inositol 3-phosphatidyltransferase</a>                                                |
| <a href="#">_hsa:10606 PAICS; phosphoribosylaminoimidazole carboxylase and phospho-ribosylaminoimidazolesuccinocarboxamide synthase</a> |
| <a href="#">_hsa:1607 DGKB; diacylglycerol kinase beta</a>                                                                              |
| <a href="#">_hsa:2194 FASN; fatty acid synthase</a>                                                                                     |
| <a href="#">_hsa:23007 PLCH1; phospholipase C eta 1</a>                                                                                 |
| <a href="#">_hsa:23408 SIRT5; sirtuin 5</a>                                                                                             |
| <a href="#">_hsa:26007 TKFC; triokinase and FMN cyclase</a>                                                                             |
| <a href="#">_hsa:2653 GCSH; glycine cleavage system protein H</a>                                                                       |
| <a href="#">_hsa:2673 GFPT1; glutamine--fructose-6-phosphate transaminase 1</a>                                                         |
| <a href="#">_hsa:27034 ACAD8; acyl-CoA dehydrogenase family member 8</a>                                                                |
| <a href="#">_hsa:27430 MAT2B; methionine adenosyltransferase 2B</a>                                                                     |
| <a href="#">_hsa:29926 GMPPA; GDP-mannose pyrophosphorylase A</a>                                                                       |
| <a href="#">_hsa:3030 HADHA; hydroxyacyl-CoA dehydrogenase trifunctional multienzyme complex subunit alpha</a>                          |
| <a href="#">_hsa:411 ARSB; arylsulfatase B</a>                                                                                          |
| <a href="#">_hsa:4535 ND1; NADH dehydrogenase subunit 1</a>                                                                             |
| <a href="#">_hsa:4725 NDUFS5; NADH:ubiquinone oxidoreductase subunit S5</a>                                                             |
| <a href="#">_hsa:501 ALDH7A1; aldehyde dehydrogenase 7 family member A1</a>                                                             |
| <a href="#">_hsa:5142 PDE4B; phosphodiesterase 4B</a>                                                                                   |
| <a href="#">_hsa:51805 COQ3; coenzyme Q3, methyltransferase</a>                                                                         |
| <a href="#">_hsa:5289 PIK3C3; phosphatidylinositol 3-kinase catalytic subunit type 3</a>                                                |

|                                                                                  |
|----------------------------------------------------------------------------------|
| <a href="#">hsa:762 CA4; carbonic anhydrase 4</a>                                |
| <a href="#">hsa:8526 DGKE; diacylglycerol kinase epsilon</a>                     |
| <a href="#">hsa:8540 AGPS; alkylglycerone phosphate synthase</a>                 |
| <a href="#">hsa:883 KYAT1; kynurenine aminotransferase 1</a>                     |
| -                                                                                |
| • <a href="#">hsa04714 Thermogenesis - Homo sapiens (human) (10)</a>             |
| <a href="#">hsa:10476 ATP5PD; ATP synthase peripheral stalk subunit d</a>        |
| <a href="#">hsa:1340 COX6B1; cytochrome c oxidase subunit 6B1</a>                |
| <a href="#">hsa:1347 COX7A2; cytochrome c oxidase subunit 7A2</a>                |
| <a href="#">hsa:1355 COX15; cytochrome c oxidase assembly homolog COX15</a>      |
| <a href="#">hsa:4535 ND1; NADH dehydrogenase subunit 1</a>                       |
| <a href="#">hsa:4725 NDUF55; NADH:ubiquinone oxidoreductase subunit S5</a>       |
| <a href="#">hsa:55744 COA1; cytochrome c oxidase assembly factor 1</a>           |
| <a href="#">hsa:5606 MAP2K3; mitogen-activated protein kinase kinase 3</a>       |
| <a href="#">hsa:6009 RHEB; Ras homolog, mTORC1 binding</a>                       |
| <a href="#">hsa:7385 UQCRC2; ubiquinol-cytochrome c reductase core protein 2</a> |
| -                                                                                |
| • <a href="#">hsa00190 Oxidative phosphorylation - Homo sapiens (human) (7)</a>  |
| <a href="#">hsa:10476 ATP5PD; ATP synthase peripheral stalk subunit d</a>        |
| <a href="#">hsa:1340 COX6B1; cytochrome c oxidase subunit 6B1</a>                |
| <a href="#">hsa:1347 COX7A2; cytochrome c oxidase subunit 7A2</a>                |
| <a href="#">hsa:1355 COX15; cytochrome c oxidase assembly homolog COX15</a>      |
| <a href="#">hsa:4535 ND1; NADH dehydrogenase subunit 1</a>                       |
| <a href="#">hsa:4725 NDUF55; NADH:ubiquinone oxidoreductase subunit S5</a>       |
| <a href="#">hsa:7385 UQCRC2; ubiquinol-cytochrome c reductase core protein 2</a> |
| -                                                                                |
| • <a href="#">hsa04910 Insulin signaling pathway - Homo sapiens (human) (6)</a>  |
| <a href="#">hsa:208 AKT2; AKT serine/threonine kinase 2</a>                      |

|                                                                                                                                   |
|-----------------------------------------------------------------------------------------------------------------------------------|
| <a href="#">hsa:5372 PMM1; phosphomannomutase 1</a>                                                                               |
| <a href="#">hsa:54205 CYCS; cytochrome c, somatic</a>                                                                             |
| <a href="#">hsa:54963 UCKL1; uridine-cytidine kinase 1 like 1</a>                                                                 |
| <a href="#">hsa:5538 PPT1; palmitoyl-protein thioesterase 1</a>                                                                   |
| <a href="#">hsa:55862 ECHDC1; ethylmalonyl-CoA decarboxylase 1</a>                                                                |
| <a href="#">hsa:56994 CHPT1; choline phosphotransferase 1</a>                                                                     |
| <a href="#">hsa:873 CBR1; carbonyl reductase 1</a>                                                                                |
| <a href="#">hsa:875 CBS; cystathionine beta-synthase</a>                                                                          |
| <a href="#">hsa:883 KYAT1; kynurenine aminotransferase 1</a>                                                                      |
| <a href="#">hsa:94005 PIGS; phosphatidylinositol glycan anchor biosynthesis class S</a>                                           |
| -                                                                                                                                 |
| • <a href="#">hsa04714 Thermogenesis - Homo sapiens (human) (7)</a>                                                               |
| <a href="#">hsa:4535 ND1; NADH dehydrogenase subunit 1</a>                                                                        |
| <a href="#">hsa:4725 NDUF55; NADH:ubiquinone oxidoreductase subunit S5</a>                                                        |
| <a href="#">hsa:55744 COA1; cytochrome c oxidase assembly factor 1</a>                                                            |
| <a href="#">hsa:57521 RPTOR; regulatory associated protein of MTOR complex 1</a>                                                  |
| <a href="#">hsa:6009 RHEB; Ras homolog, mTORC1 binding</a>                                                                        |
| <a href="#">hsa:6197 RPS6KA3; ribosomal protein S6 kinase A3</a>                                                                  |
| <a href="#">hsa:6599 SMARCC1; SWI/SNF related, matrix associated, actin dependent regulator of chromatin subfamily c member 1</a> |
|                                                                                                                                   |
| • <a href="#">hsa04910 Insulin signaling pathway - Homo sapiens (human) (4)</a>                                                   |
| <a href="#">hsa:2194 FASN; fatty acid synthase</a>                                                                                |
| <a href="#">hsa:5602 MAPK10; mitogen-activated protein kinase 10</a>                                                              |
| <a href="#">hsa:57521 RPTOR; regulatory associated protein of MTOR complex 1</a>                                                  |
| <a href="#">hsa:6009 RHEB; Ras homolog, mTORC1 binding</a>                                                                        |
|                                                                                                                                   |
| • <a href="#">hsa04024 cAMP signaling pathway - Homo sapiens (human) (5)</a>                                                      |
| <a href="#">hsa:2893 GRIA4; glutamate ionotropic receptor AMPA type subunit 4</a>                                                 |

|                                                                                                 |
|-------------------------------------------------------------------------------------------------|
| <a href="#">_hsa:5499 PPP1CA; protein phosphatase 1 catalytic subunit alpha</a>                 |
| <a href="#">_hsa:5575 PRKAR1B; protein kinase cAMP-dependent type I regulatory subunit beta</a> |
| <a href="#">_hsa:5792 PTPRF; protein tyrosine phosphatase receptor type F</a>                   |
| <a href="#">_hsa:6009 RHEB; Ras homolog, mTORC1 binding</a>                                     |
| <a href="#">_hsa:673 BRAF; B-Raf proto-oncogene, serine/threonine kinase</a>                    |
| -                                                                                               |
| • <a href="#">_hsa04931 Insulin resistance - Homo sapiens (human) (4)</a>                       |
| <a href="#">_hsa:10999 SLC27A4; solute carrier family 27 member 4</a>                           |
| <a href="#">_hsa:208 AKT2; AKT serine/threonine kinase 2</a>                                    |
| <a href="#">_hsa:5499 PPP1CA; protein phosphatase 1 catalytic subunit alpha</a>                 |
| <a href="#">_hsa:5792 PTPRF; protein tyrosine phosphatase receptor type F</a>                   |
|                                                                                                 |
| • <a href="#">_hsa04024 cAMP signaling pathway - Homo sapiens (human) (6)</a>                   |
| <a href="#">_hsa:208 AKT2; AKT serine/threonine kinase 2</a>                                    |
| <a href="#">_hsa:487 ATP2A1; ATPase sarcoplasmic/endoplasmic reticulum Ca2+ transporting 1</a>  |
| <a href="#">_hsa:51 ACOX1; acyl-CoA oxidase 1</a>                                               |
| <a href="#">_hsa:5499 PPP1CA; protein phosphatase 1 catalytic subunit alpha</a>                 |
| <a href="#">_hsa:5908 RAP1B; RAP1B, member of RAS oncogene family</a>                           |
| <a href="#">_hsa:673 BRAF; B-Raf proto-oncogene, serine/threonine kinase</a>                    |
|                                                                                                 |
| • <a href="#">_hsa04010 MAPK signaling pathway - Homo sapiens (human) (5)</a>                   |
| <a href="#">_hsa:208 AKT2; AKT serine/threonine kinase 2</a>                                    |
| <a href="#">_hsa:4763 NF1; neurofibromin 1</a>                                                  |
| <a href="#">_hsa:5606 MAP2K3; mitogen-activated protein kinase kinase 3</a>                     |

|                                                                                                 |
|-------------------------------------------------------------------------------------------------|
| <a href="#">_hsa:4301 AFDN; afadin, adherens junction formation factor</a>                      |
| <a href="#">_hsa:487 ATP2A1; ATPase sarcoplasmic/endoplasmic reticulum Ca2+ transporting 1</a>  |
| <a href="#">_hsa:5142 PDE4B; phosphodiesterase 4B</a>                                           |
| <a href="#">_hsa:5602 MAPK10; mitogen-activated protein kinase 10</a>                           |
|                                                                                                 |
| • <a href="#">_hsa04020 calcium signaling pathway - Homo sapiens (human) (4)</a>                |
| <a href="#">_hsa:10105 PPIF; peptidylprolyl isomerase F</a>                                     |
| <a href="#">_hsa:2769 GNA15; G protein subunit alpha 15</a>                                     |
| <a href="#">_hsa:487 ATP2A1; ATPase sarcoplasmic/endoplasmic reticulum Ca2+ transporting 1</a>  |
| <a href="#">_hsa:777 CACNA1E; calcium voltage-gated channel subunit alpha1 E</a>                |
|                                                                                                 |
| • <a href="#">_hsa00260 Glycine, serine and threonine metabolism - Homo sapiens (human) (4)</a> |
| <a href="#">_hsa:102724560 CBS; cystathionine beta-synthase like</a>                            |
| <a href="#">_hsa:2653 GCSH; glycine cleavage system protein H</a>                               |
| <a href="#">_hsa:501 ALDH7A1; aldehyde dehydrogenase 7 family member A1</a>                     |
| <a href="#">_hsa:875 CBS; cystathionine beta-synthase</a>                                       |
|                                                                                                 |
| • <a href="#">_hsa04150 mTOR signaling pathway - Homo sapiens (human) (4)</a>                   |
| <a href="#">_hsa:57521 RPTOR; regulatory associated protein of MTOR complex 1</a>               |
| <a href="#">_hsa:6009 RHEB; Ras homolog, mTORC1 binding</a>                                     |
| <a href="#">_hsa:6197 RPS6KA3; ribosomal protein S6 kinase A3</a>                               |
| <a href="#">_hsa:64798 DEPTOR; DEP domain containing MTOR interacting protein</a>               |
|                                                                                                 |
| • <a href="#">_hsa00270 cysteine and methionine metabolism - Homo sapiens (human) (4)</a>       |

|                                                                                               |
|-----------------------------------------------------------------------------------------------|
| <a href="#">hsa:5908 RAP1B; RAP1B, member of RAS oncogene family</a>                          |
| <a href="#">hsa:673 BRAF; B-Raf proto-oncogene, serine/threonine kinase</a>                   |
|                                                                                               |
| • <a href="#">hsa04022 cGMP-PKG signaling pathway - Homo sapiens (human) (4)</a>              |
| <a href="#">hsa:208 AKT2; AKT serine/threonine kinase 2</a>                                   |
| <a href="#">hsa:3708 ITPR1; inositol 1,4,5-trisphosphate receptor type 1</a>                  |
| <a href="#">hsa:487 ATP2A1; ATPase sarcoplasmic/endoplasmic reticulum Ca2+ transporting 1</a> |
| <a href="#">hsa:5499 PPP1CA; protein phosphatase 1 catalytic subunit alpha</a>                |
|                                                                                               |
| • <a href="#">hsa04151 PI3K-Akt signaling pathway - Homo sapiens (human) (4)</a>              |
| <a href="#">hsa:1282 COL4A1; collagen type IV alpha 1 chain</a>                               |
| <a href="#">hsa:208 AKT2; AKT serine/threonine kinase 2</a>                                   |
| <a href="#">hsa:3679 ITGA7; integrin subunit alpha 7</a>                                      |
| <a href="#">hsa:6009 RHEB; Ras homolog, mTORC1 binding</a>                                    |
| -                                                                                             |
| <b>AUTOPHAGY AND SENEESCENCE</b>                                                              |
| • <a href="#">hsa04140 Autophagy - animal - Homo sapiens (human) (7)</a>                      |
| <a href="#">hsa:208 AKT2; AKT serine/threonine kinase 2</a>                                   |
| <a href="#">hsa:23192 ATG4B; autophagy related 4B cysteine peptidase</a>                      |
| <a href="#">hsa:3708 ITPR1; inositol 1,4,5-trisphosphate receptor type 1</a>                  |
| <a href="#">hsa:3920 LAMP2; lysosomal associated membrane protein 2</a>                       |
| <a href="#">hsa:53349 ZFYVE1; zinc finger FYVE-type containing 1</a>                          |
| <a href="#">hsa:6009 RHEB; Ras homolog, mTORC1 binding</a>                                    |
| <a href="#">hsa:64422 ATG3; autophagy related 3</a>                                           |
| -                                                                                             |
| • <a href="#">hsa04218 Cellular senescence - Homo sapiens (human) (5)</a>                     |
| <a href="#">hsa:208 AKT2; AKT serine/threonine kinase 2</a>                                   |

|                                                                                         |
|-----------------------------------------------------------------------------------------|
| <a href="#">hsa:102724560 CBS; cystathionine beta-synthase like</a>                     |
| <a href="#">hsa:27430 MAT2B; methionine adenosyltransferase 2B</a>                      |
| <a href="#">hsa:875 CBS; cystathionine beta-synthase</a>                                |
| <a href="#">hsa:883 KYAT1; kynurenine aminotransferase 1</a>                            |
| -                                                                                       |
| -                                                                                       |
| -                                                                                       |
| -                                                                                       |
| -                                                                                       |
| -                                                                                       |
| -                                                                                       |
| -                                                                                       |
| -                                                                                       |
| -                                                                                       |
| -                                                                                       |
| -                                                                                       |
| <b>AUTOPHAGY AND SENEESCENCE</b>                                                        |
| • <a href="#">hsa04140 Autophagy - animal - Homo sapiens (human) (6)</a>                |
| <a href="#">hsa:30849 PIK3R4; phosphoinositide-3-kinase regulatory subunit 4</a>        |
| <a href="#">hsa:5289 PIK3C3; phosphatidylinositol 3-kinase catalytic subunit type 3</a> |
| <a href="#">hsa:5602 MAPK10; mitogen-activated protein kinase 10</a>                    |
| <a href="#">hsa:57521 RPTOR; regulatory associated protein of MTOR complex 1</a>        |
| <a href="#">hsa:6009 RHEB; Ras homolog, mTORC1 binding</a>                              |
| <a href="#">hsa:64798 DEPTOR; DEP domain containing MTOR interacting protein</a>        |
|                                                                                         |
| • <a href="#">hsa04210 Apoptosis - Homo sapiens (human) (4)</a>                         |
| <a href="#">hsa:54205 CYCS; cytochrome c, somatic</a>                                   |
| <a href="#">hsa:5602 MAPK10; mitogen-activated protein kinase 10</a>                    |

|                                                                                                   |
|---------------------------------------------------------------------------------------------------|
| <a href="#">hsa:3708 ITPR1; inositol 1,4,5-trisphosphate receptor type 1</a>                      |
| <a href="#">hsa:5499 PPP1CA; protein phosphatase 1 catalytic subunit alpha</a>                    |
| <a href="#">hsa:5606 MAP2K3; mitogen-activated protein kinase kinase 3</a>                        |
| <a href="#">hsa:6009 RHEB; Ras homolog, mTORC1 binding</a>                                        |
|                                                                                                   |
| <b>LYSOSOMES AND VESICULAR TRANSPORT</b>                                                          |
| • <a href="#">hsa04142 Lysosome - Homo sapiens (human) (5)</a>                                    |
| <a href="#">hsa:10577 NPC2; NPC intracellular cholesterol transporter 2</a>                       |
| <a href="#">hsa:2799 GNS; glucosamine (N-acetyl)-6-sulfatase</a>                                  |
| <a href="#">hsa:3920 LAMP2; lysosomal associated membrane protein 2</a>                           |
| <a href="#">hsa:410 ARSA; arylsulfatase A</a>                                                     |
| <a href="#">hsa:8546 AP3B1; adaptor related protein complex 3 subunit beta 1</a>                  |
|                                                                                                   |
| • <a href="#">hsa04144 Endocytosis - Homo sapiens (human) (4)</a>                                 |
| <a href="#">hsa:440073 IQSEC3; IQ motif and Sec7 domain ArfGEF 3</a>                              |
| <a href="#">hsa:4734 NEDD4; NEDD4 E3 ubiquitin protein ligase</a>                                 |
| <a href="#">hsa:56904 SH3GLB2; SH3 domain containing GRB2 like, endophilin B2</a>                 |
| <a href="#">hsa:6642 SNX1; sorting nexin 1</a>                                                    |
|                                                                                                   |
| • <a href="#">hsa04141 Protein processing in endoplasmic reticulum - Homo sapiens (human) (4)</a> |
| <a href="#">hsa:11231 SEC63; SEC63 homolog, protein translocation regulator</a>                   |
| <a href="#">hsa:201595 STT3B; STT3 oligosaccharyltransferase complex catalytic subunit B</a>      |
| <a href="#">hsa:55666 NPLOC4; NPL4 homolog, ubiquitin recognition factor</a>                      |
| <a href="#">hsa:9601 PDIA4; protein disulfide isomerase family A member 4</a>                     |
|                                                                                                   |
| • <a href="#">hsa04015 Rap1 signaling pathway - Homo sapiens (human) (4)</a>                      |
| <a href="#">hsa:208 AKT2; AKT serine/threonine kinase 2</a>                                       |

|                                                                                                   |
|---------------------------------------------------------------------------------------------------|
| <a href="#">hsa:7846 TUBA1A; tubulin alpha 1a</a>                                                 |
| <a href="#">hsa:84790 TUBA1C; tubulin alpha 1c</a>                                                |
| -                                                                                                 |
| -                                                                                                 |
| -                                                                                                 |
| <b>LYSOSOMES AND VESICULAR TRANSPORT</b>                                                          |
| • <a href="#">hsa04142 Lysosome - Homo sapiens (human) (5)</a>                                    |
| <a href="#">hsa:1176 AP3S1; adaptor related protein complex 3 subunit sigma 1</a>                 |
| <a href="#">hsa:2517 FUCA1; alpha-L-fucosidase 1</a>                                              |
| <a href="#">hsa:411 ARSB; arylsulfatase B</a>                                                     |
| <a href="#">hsa:5538 PPT1; palmitoyl-protein thioesterase 1</a>                                   |
| <a href="#">hsa:6272 SORT1; sortilin 1</a>                                                        |
| -                                                                                                 |
| • <a href="#">hsa04144 Endocytosis - Homo sapiens (human) (4)</a>                                 |
| <a href="#">hsa:23096 IQSEC2; IQ motif and Sec7 domain ArfGEF 2</a>                               |
| <a href="#">hsa:27243 CHMP2A; charged multivesicular body protein 2A</a>                          |
| <a href="#">hsa:6642 SNX1; sorting nexin 1</a>                                                    |
| <a href="#">hsa:832 CAPZB; capping actin protein of muscle Z-line subunit beta</a>                |
| -                                                                                                 |
| • <a href="#">hsa04141 Protein processing in endoplasmic reticulum - Homo sapiens (human) (6)</a> |
| <a href="#">hsa:10952 SEC61B; SEC61 translocon subunit beta</a>                                   |
| <a href="#">hsa:3300 DNAJB2; DnaJ heat shock protein family (Hsp40) member B2</a>                 |
| <a href="#">hsa:55666 NPLOC4; NPL4 homolog, ubiquitin recognition factor</a>                      |
| <a href="#">hsa:5602 MAPK10; mitogen-activated protein kinase 10</a>                              |
| <a href="#">hsa:7095 SEC62; SEC62 homolog, preprotein translocation factor</a>                    |
| <a href="#">hsa:7353 UFD1; ubiquitin recognition factor in ER associated degradation 1</a>        |
|                                                                                                   |

|                                                                             |
|-----------------------------------------------------------------------------|
| <a href="#">hsa:5606 MAP2K3; mitogen-activated protein kinase kinase 3</a>  |
| <a href="#">hsa:5908 RAP1B; RAP1B, member of RAS oncogene family</a>        |
| <a href="#">hsa:673 BRAF; B-Raf proto-oncogene, serine/threonine kinase</a> |

## NEUROLOGIC DISEASES

|                                                                                                                                              |
|----------------------------------------------------------------------------------------------------------------------------------------------|
| <ul style="list-style-type: none"> <li>• <a href="#">hsa04723 Retrograde endocannabinoid signaling - Homo sapiens (human) (4)</a></li> </ul> |
| <a href="#">hsa:2893 GRIA4; glutamate ionotropic receptor AMPA type subunit 4</a>                                                            |
| <a href="#">hsa:4535 ND1; NADH dehydrogenase subunit 1</a>                                                                                   |
| <a href="#">hsa:4725 NDUFS5; NADH:ubiquinone oxidoreductase subunit S5</a>                                                                   |
| <a href="#">hsa:5602 MAPK10; mitogen-activated protein kinase 10</a>                                                                         |
| <a href="#">hsa:5602 MAPK10; mitogen-activated protein kinase 10</a>                                                                         |
| <a href="#">hsa:5692 PSMB4; proteasome 20S subunit beta 4</a>                                                                                |
| <a href="#">hsa:7846 TUBA1A; tubulin alpha 1a</a>                                                                                            |
| <a href="#">hsa:84790 TUBA1C; tubulin alpha 1c</a>                                                                                           |
|                                                                                                                                              |
| <ul style="list-style-type: none"> <li>• <a href="#">hsa04145 Phagosome - Homo sapiens (human) (4)</a></li> </ul>                            |
| <a href="#">hsa:10952 SEC61B; SEC61 translocon subunit beta</a>                                                                              |
| <a href="#">hsa:5289 PIK3C3; phosphatidylinositol 3-kinase catalytic subunit type 3</a>                                                      |
| <a href="#">hsa:7846 TUBA1A; tubulin alpha 1a</a>                                                                                            |
| <a href="#">hsa:84790 TUBA1C; tubulin alpha 1c</a>                                                                                           |
|                                                                                                                                              |
| <b>TRANSLATION AND SPLICING</b>                                                                                                              |
| <ul style="list-style-type: none"> <li>• <a href="#">hsa03040 Spliceosome - Homo sapiens (human) (7)</a></li> </ul>                          |
| <a href="#">hsa:11338 U2AF2; U2 small nuclear RNA auxiliary factor 2</a>                                                                     |
| <a href="#">hsa:1655 DDX5; DEAD-box helicase 5</a>                                                                                           |
| <a href="#">hsa:3190 HNRNPK; heterogeneous nuclear ribonucleoprotein K</a>                                                                   |
| <a href="#">hsa:6429 SRSF4; serine and arginine rich splicing factor 4</a>                                                                   |
| <a href="#">hsa:6431 SRSF6; serine and arginine rich splicing factor 6</a>                                                                   |
| <a href="#">hsa:6434 TRA2B; transformer 2 beta homolog</a>                                                                                   |
| <a href="#">hsa:9939 RBM8A; RNA binding motif protein 8A</a>                                                                                 |
|                                                                                                                                              |
| <b>NEUROLOGIC DISEASES</b>                                                                                                                   |

|                                                                                                                                                            |
|------------------------------------------------------------------------------------------------------------------------------------------------------------|
| <ul style="list-style-type: none"> <li>• <a href="#">hsa05022</a> Pathways of neurodegeneration - multiple diseases - Homo sapiens (human) (17)</li> </ul> |
| <a href="#">hsa:1020</a> CDK5; cyclin dependent kinase 5                                                                                                   |
| <a href="#">hsa:10476</a> ATP5PD; ATP synthase peripheral stalk subunit d                                                                                  |
| <a href="#">hsa:10540</a> DCTN2; dynactin subunit 2                                                                                                        |
| <a href="#">hsa:1340</a> COX6B1; cytochrome c oxidase subunit 6B1                                                                                          |
| <a href="#">hsa:1347</a> COX7A2; cytochrome c oxidase subunit 7A2                                                                                          |
| <a href="#">hsa:1639</a> DCTN1; dynactin subunit 1                                                                                                         |
| <a href="#">hsa:324</a> APC; APC regulator of WNT signaling pathway                                                                                        |
| <a href="#">hsa:3708</a> ITPR1; inositol 1,4,5-trisphosphate receptor type 1                                                                               |
| <a href="#">hsa:4535</a> ND1; NADH dehydrogenase subunit 1                                                                                                 |
| <a href="#">hsa:4725</a> NDUFS5; NADH:ubiquinone oxidoreductase subunit S5                                                                                 |
| <a href="#">hsa:487</a> ATP2A1; ATPase sarcoplasmic/endoplasmic reticulum Ca2+ transporting 1                                                              |
| <a href="#">hsa:53349</a> ZFYVE1; zinc finger FYVE-type containing 1                                                                                       |
| <a href="#">hsa:5606</a> MAP2K3; mitogen-activated protein kinase kinase 3                                                                                 |
| <a href="#">hsa:5682</a> PSMA1; proteasome 20S subunit alpha 1                                                                                             |
| <a href="#">hsa:5694</a> PSMB6; proteasome 20S subunit beta 6                                                                                              |
| <a href="#">hsa:673</a> BRAF; B-Raf proto-oncogene, serine/threonine kinase                                                                                |
| <a href="#">hsa:7385</a> UQCRC2; ubiquinol-cytochrome c reductase core protein 2                                                                           |
|                                                                                                                                                            |
| <ul style="list-style-type: none"> <li>• <a href="#">hsa05016</a> Huntington disease - Homo sapiens (human) (11)</li> </ul>                                |
| <a href="#">hsa:10476</a> ATP5PD; ATP synthase peripheral stalk subunit d                                                                                  |
| <a href="#">hsa:10540</a> DCTN2; dynactin subunit 2                                                                                                        |
| <a href="#">hsa:1340</a> COX6B1; cytochrome c oxidase subunit 6B1                                                                                          |
| <a href="#">hsa:1347</a> COX7A2; cytochrome c oxidase subunit 7A2                                                                                          |
| <a href="#">hsa:1639</a> DCTN1; dynactin subunit 1                                                                                                         |
| <a href="#">hsa:3708</a> ITPR1; inositol 1,4,5-trisphosphate receptor type 1                                                                               |

|                                                                                                                             |
|-----------------------------------------------------------------------------------------------------------------------------|
| <ul style="list-style-type: none"> <li>• <a href="#">hsa05016</a> Huntington disease - Homo sapiens (human) (14)</li> </ul> |
| <a href="#">hsa:10105</a> PPIF; peptidylprolyl isomerase F                                                                  |
| <a href="#">hsa:10120</a> ACTR1B; actin related protein 1B                                                                  |
| <a href="#">hsa:11258</a> DCTN3; dynactin subunit 3                                                                         |
| <a href="#">hsa:1639</a> DCTN1; dynactin subunit 1                                                                          |
| <a href="#">hsa:2893</a> GRIA4; glutamate ionotropic receptor AMPA type subunit 4                                           |
| <a href="#">hsa:30849</a> PIK3R4; phosphoinositide-3-kinase regulatory subunit 4                                            |
| <a href="#">hsa:4535</a> ND1; NADH dehydrogenase subunit 1                                                                  |
| <a href="#">hsa:4725</a> NDUFS5; NADH:ubiquinone oxidoreductase subunit S5                                                  |
| <a href="#">hsa:5289</a> PIK3C3; phosphatidylinositol 3-kinase catalytic subunit type 3                                     |
| <a href="#">hsa:54205</a> CYCS; cytochrome c, somatic                                                                       |
|                                                                                                                             |
| <a href="#">hsa:5602</a> MAPK10; mitogen-activated protein kinase 10                                                        |
| <a href="#">hsa:5692</a> PSMB4; proteasome 20S subunit beta 4                                                               |
| <a href="#">hsa:7846</a> TUBA1A; tubulin alpha 1a                                                                           |
| <a href="#">hsa:84790</a> TUBA1C; tubulin alpha 1c                                                                          |
|                                                                                                                             |
| <ul style="list-style-type: none"> <li>• <a href="#">hsa05010</a> Alzheimer disease - Homo sapiens (human) (13)</li> </ul>  |
| <a href="#">hsa:10105</a> PPIF; peptidylprolyl isomerase F                                                                  |
| <a href="#">hsa:10313</a> RTN3; reticulon 3                                                                                 |
| <a href="#">hsa:30849</a> PIK3R4; phosphoinositide-3-kinase regulatory subunit 4                                            |
| <a href="#">hsa:324</a> APC; APC regulator of WNT signaling pathway                                                         |
| <a href="#">hsa:4535</a> ND1; NADH dehydrogenase subunit 1                                                                  |
| <a href="#">hsa:4725</a> NDUFS5; NADH:ubiquinone oxidoreductase subunit S5                                                  |
| <a href="#">hsa:487</a> ATP2A1; ATPase sarcoplasmic/endoplasmic reticulum Ca2+ transporting 1                               |
| <a href="#">hsa:5289</a> PIK3C3; phosphatidylinositol 3-kinase catalytic subunit type 3                                     |
| <a href="#">hsa:54205</a> CYCS; cytochrome c, somatic                                                                       |



|                                                                                               |
|-----------------------------------------------------------------------------------------------|
| <a href="#">hsa:4535 ND1; NADH dehydrogenase subunit 1</a>                                    |
| <a href="#">hsa:4725 NDUF55; NADH:ubiquinone oxidoreductase subunit S5</a>                    |
| <a href="#">hsa:5682 PSMA1; proteasome 20S subunit alpha 1</a>                                |
| <a href="#">hsa:5694 PSMB6; proteasome 20S subunit beta 6</a>                                 |
| <a href="#">hsa:7385 UQCRC2; ubiquinol-cytochrome c reductase core protein 2</a>              |
|                                                                                               |
| • <a href="#">hsa05010 Alzheimer disease - Homo sapiens (human) (14)</a>                      |
| <a href="#">hsa:1020 CDK5; cyclin dependent kinase 5</a>                                      |
| <a href="#">hsa:10476 ATP5PD; ATP synthase peripheral stalk subunit d</a>                     |
| <a href="#">hsa:1340 COX6B1; cytochrome c oxidase subunit 6B1</a>                             |
| <a href="#">hsa:1347 COX7A2; cytochrome c oxidase subunit 7A2</a>                             |
| <a href="#">hsa:208 AKT2; AKT serine/threonine kinase 2</a>                                   |
| <a href="#">hsa:324 APC; APC regulator of WNT signaling pathway</a>                           |
| <a href="#">hsa:3708 ITPR1; inositol 1,4,5-trisphosphate receptor type 1</a>                  |
| <a href="#">hsa:4535 ND1; NADH dehydrogenase subunit 1</a>                                    |
| <a href="#">hsa:4725 NDUF55; NADH:ubiquinone oxidoreductase subunit S5</a>                    |
| <a href="#">hsa:487 ATP2A1; ATPase sarcoplasmic/endoplasmic reticulum Ca2+ transporting 1</a> |
| <a href="#">hsa:5682 PSMA1; proteasome 20S subunit alpha 1</a>                                |
| <a href="#">hsa:5694 PSMB6; proteasome 20S subunit beta 6</a>                                 |
| <a href="#">hsa:673 BRAF; B-Raf proto-oncogene, serine/threonine kinase</a>                   |
| <a href="#">hsa:7385 UQCRC2; ubiquinol-cytochrome c reductase core protein 2</a>              |
|                                                                                               |
| • <a href="#">hsa05014 Amyotrophic lateral sclerosis - Homo sapiens (human) (13)</a>          |
| <a href="#">hsa:10476 ATP5PD; ATP synthase peripheral stalk subunit d</a>                     |
| <a href="#">hsa:10540 DCTN2; dynactin subunit 2</a>                                           |
| <a href="#">hsa:1340 COX6B1; cytochrome c oxidase subunit 6B1</a>                             |

|                                                                                         |
|-----------------------------------------------------------------------------------------|
| <a href="#">hsa:5602 MAPK10; mitogen-activated protein kinase 10</a>                    |
| <a href="#">hsa:5692 PSMB4; proteasome 20S subunit beta 4</a>                           |
| <a href="#">hsa:7846 TUBA1A; tubulin alpha 1a</a>                                       |
| <a href="#">hsa:84790 TUBA1C; tubulin alpha 1c</a>                                      |
|                                                                                         |
| • <a href="#">hsa05014 Amyotrophic lateral sclerosis - Homo sapiens (human) (12)</a>    |
| <a href="#">hsa:10452 TOMM40; translocase of outer mitochondrial membrane 40</a>        |
| <a href="#">hsa:11258 DCTN3; dynactin subunit 3</a>                                     |
| <a href="#">hsa:1639 DCTN1; dynactin subunit 1</a>                                      |
| <a href="#">hsa:30849 PIK3R4; phosphoinositide-3-kinase regulatory subunit 4</a>        |
| <a href="#">hsa:4535 ND1; NADH dehydrogenase subunit 1</a>                              |
| <a href="#">hsa:4725 NDUF55; NADH:ubiquinone oxidoreductase subunit S5</a>              |
| <a href="#">hsa:5289 PIK3C3; phosphatidylinositol 3-kinase catalytic subunit type 3</a> |
| <a href="#">hsa:54205 CYCS; cytochrome c, somatic</a>                                   |
| <a href="#">hsa:5692 PSMB4; proteasome 20S subunit beta 4</a>                           |
| <a href="#">hsa:7846 TUBA1A; tubulin alpha 1a</a>                                       |
| <a href="#">hsa:84790 TUBA1C; tubulin alpha 1c</a>                                      |
|                                                                                         |
| -                                                                                       |
| • <a href="#">hsa05020 Prion disease - Homo sapiens (human) (8)</a>                     |
| <a href="#">hsa:10105 PPIF; peptidylprolyl isomerase F</a>                              |
| <a href="#">hsa:4535 ND1; NADH dehydrogenase subunit 1</a>                              |
| <a href="#">hsa:4725 NDUF55; NADH:ubiquinone oxidoreductase subunit S5</a>              |
| <a href="#">hsa:54205 CYCS; cytochrome c, somatic</a>                                   |
| <a href="#">hsa:5602 MAPK10; mitogen-activated protein kinase 10</a>                    |
| <a href="#">hsa:5692 PSMB4; proteasome 20S subunit beta 4</a>                           |
| <a href="#">hsa:7846 TUBA1A; tubulin alpha 1a</a>                                       |

|                                                                                  |
|----------------------------------------------------------------------------------|
| <a href="#">hsa:1347 COX7A2; cytochrome c oxidase subunit 7A2</a>                |
| <a href="#">hsa:1639 DCTN1; dynactin subunit 1</a>                               |
| <a href="#">hsa:3178 HNRNPA1; heterogeneous nuclear ribonucleoprotein A1</a>     |
| <a href="#">hsa:4535 ND1; NADH dehydrogenase subunit 1</a>                       |
| <a href="#">hsa:4725 NDUF55; NADH:ubiquinone oxidoreductase subunit S5</a>       |
| <a href="#">hsa:4928 NUP98; nucleoporin 98 and 96 precursor</a>                  |
| <a href="#">hsa:5606 MAP2K3; mitogen-activated protein kinase kinase 3</a>       |
| <a href="#">hsa:5682 PSMA1; proteasome 20S subunit alpha 1</a>                   |
| <a href="#">hsa:5694 PSMB6; proteasome 20S subunit beta 6</a>                    |
| <a href="#">hsa:7385 UQCRC2; ubiquinol-cytochrome c reductase core protein 2</a> |
|                                                                                  |
| • <a href="#">hsa05020 Prion disease - Homo sapiens (human) (10)</a>             |
| <a href="#">hsa:10476 ATP5PD; ATP synthase peripheral stalk subunit d</a>        |
| <a href="#">hsa:10963 STIP1; stress induced phosphoprotein 1</a>                 |
| <a href="#">hsa:1340 COX6B1; cytochrome c oxidase subunit 6B1</a>                |
| <a href="#">hsa:1347 COX7A2; cytochrome c oxidase subunit 7A2</a>                |
| <a href="#">hsa:3708 ITPR1; inositol 1,4,5-trisphosphate receptor type 1</a>     |
| <a href="#">hsa:4535 ND1; NADH dehydrogenase subunit 1</a>                       |
| <a href="#">hsa:4725 NDUF55; NADH:ubiquinone oxidoreductase subunit S5</a>       |
| <a href="#">hsa:5682 PSMA1; proteasome 20S subunit alpha 1</a>                   |
| <a href="#">hsa:5694 PSMB6; proteasome 20S subunit beta 6</a>                    |
| <a href="#">hsa:7385 UQCRC2; ubiquinol-cytochrome c reductase core protein 2</a> |
|                                                                                  |
| • <a href="#">hsa05012 Parkinson disease - Homo sapiens (human) (9)</a>          |
| <a href="#">hsa:10476 ATP5PD; ATP synthase peripheral stalk subunit d</a>        |
| <a href="#">hsa:1340 COX6B1; cytochrome c oxidase subunit 6B1</a>                |
| <a href="#">hsa:1347 COX7A2; cytochrome c oxidase subunit 7A2</a>                |
| <a href="#">hsa:3708 ITPR1; inositol 1,4,5-trisphosphate receptor type 1</a>     |

|                                                                                                     |
|-----------------------------------------------------------------------------------------------------|
| <a href="#">hsa:84790 TUBA1C; tubulin alpha 1c</a>                                                  |
| -                                                                                                   |
| • <a href="#">hsa05012 Parkinson disease - Homo sapiens (human) (8)</a>                             |
| <a href="#">hsa:10105 PPIF; peptidylprolyl isomerase F</a>                                          |
| <a href="#">hsa:4535 ND1; NADH dehydrogenase subunit 1</a>                                          |
| <a href="#">hsa:4725 NDUF55; NADH:ubiquinone oxidoreductase subunit S5</a>                          |
| <a href="#">hsa:54205 CYCS; cytochrome c, somatic</a>                                               |
| <a href="#">hsa:5602 MAPK10; mitogen-activated protein kinase 10</a>                                |
| <a href="#">hsa:5692 PSMB4; proteasome 20S subunit beta 4</a>                                       |
| <a href="#">hsa:7846 TUBA1A; tubulin alpha 1a</a>                                                   |
| <a href="#">hsa:84790 TUBA1C; tubulin alpha 1c</a>                                                  |
| -                                                                                                   |
| • <a href="#">hsa05017 Spinocerebellar ataxia - Homo sapiens (human) (7)</a>                        |
| <a href="#">hsa:10105 PPIF; peptidylprolyl isomerase F</a>                                          |
| <a href="#">hsa:30849 PIK3R4; phosphoinositide-3-kinase regulatory subunit 4</a>                    |
| <a href="#">hsa:487 ATP2A1; ATPase sarcoplasmic/endoplasmic reticulum Ca2+ trans-<br/>porting 1</a> |
| <a href="#">hsa:5289 PIK3C3; phosphatidylinositol 3-kinase catalytic subunit type 3</a>             |
| <a href="#">hsa:54205 CYCS; cytochrome c, somatic</a>                                               |
| <a href="#">hsa:5602 MAPK10; mitogen-activated protein kinase 10</a>                                |
| <a href="#">hsa:5692 PSMB4; proteasome 20S subunit beta 4</a>                                       |
| -                                                                                                   |
| -                                                                                                   |
| -                                                                                                   |
| -                                                                                                   |
| -                                                                                                   |
| -                                                                                                   |
| -                                                                                                   |
| -                                                                                                   |
| -                                                                                                   |

|                                                                                                                                                            |
|------------------------------------------------------------------------------------------------------------------------------------------------------------|
| <a href="#">_hsa:4535 ND1; NADH dehydrogenase subunit 1</a>                                                                                                |
| <a href="#">_hsa:4725 NDUF55; NADH:ubiquinone oxidoreductase subunit S5</a>                                                                                |
| <a href="#">_hsa:5682 PSMA1; proteasome 20S subunit alpha 1</a>                                                                                            |
| <a href="#">_hsa:5694 PSMB6; proteasome 20S subunit beta 6</a>                                                                                             |
| <a href="#">_hsa:7385 UQCRC2; ubiquinol-cytochrome c reductase core protein 2</a>                                                                          |
|                                                                                                                                                            |
| <ul style="list-style-type: none"> <li>• <a href="#">_hsa05208</a> Chemical carcinogenesis - reactive oxygen species - Homo sapiens (human) (8)</li> </ul> |
| <a href="#">_hsa:10476 ATP5PD; ATP synthase peripheral stalk subunit d</a>                                                                                 |
| <a href="#">_hsa:1340 COX6B1; cytochrome c oxidase subunit 6B1</a>                                                                                         |
| <a href="#">_hsa:1347 COX7A2; cytochrome c oxidase subunit 7A2</a>                                                                                         |
| <a href="#">_hsa:208 AKT2; AKT serine/threonine kinase 2</a>                                                                                               |
| <a href="#">_hsa:4535 ND1; NADH dehydrogenase subunit 1</a>                                                                                                |
| <a href="#">_hsa:4725 NDUF55; NADH:ubiquinone oxidoreductase subunit S5</a>                                                                                |
| <a href="#">_hsa:673 BRAF; B-Raf proto-oncogene, serine/threonine kinase</a>                                                                               |
| <a href="#">_hsa:7385 UQCRC2; ubiquinol-cytochrome c reductase core protein 2</a>                                                                          |
|                                                                                                                                                            |
| <b>ECM, FOCAL ADHESION AND CYTOSKELETON</b>                                                                                                                |
| <ul style="list-style-type: none"> <li>• <a href="#">_hsa04810</a> Regulation of actin cytoskeleton - Homo sapiens (human) (4)</li> </ul>                  |
| <a href="#">_hsa:324 APC; APC regulator of WNT signaling pathway</a>                                                                                       |
| <a href="#">_hsa:3679 ITGA7; integrin subunit alpha 7</a>                                                                                                  |
| <a href="#">_hsa:5499 PPP1CA; protein phosphatase 1 catalytic subunit alpha</a>                                                                            |
| <a href="#">_hsa:673 BRAF; B-Raf proto-oncogene, serine/threonine kinase</a>                                                                               |
|                                                                                                                                                            |
| <ul style="list-style-type: none"> <li>• <a href="#">_hsa04512</a> ECM-receptor interaction - Homo sapiens (human) (4)</li> </ul>                          |
| <a href="#">_hsa:1282 COL4A1; collagen type IV alpha 1 chain</a>                                                                                           |
| <a href="#">_hsa:3339 HSPG2; heparan sulfate proteoglycan 2</a>                                                                                            |
| <a href="#">_hsa:3679 ITGA7; integrin subunit alpha 7</a>                                                                                                  |

|                                                                                                                                                            |
|------------------------------------------------------------------------------------------------------------------------------------------------------------|
| -                                                                                                                                                          |
| -                                                                                                                                                          |
| -                                                                                                                                                          |
| -                                                                                                                                                          |
|                                                                                                                                                            |
|                                                                                                                                                            |
| <ul style="list-style-type: none"> <li>• <a href="#">_hsa05208</a> Chemical carcinogenesis - reactive oxygen species - Homo sapiens (human) (5)</li> </ul> |
| <a href="#">_hsa:10105 PPIF; peptidylprolyl isomerase F</a>                                                                                                |
| <a href="#">_hsa:4535 ND1; NADH dehydrogenase subunit 1</a>                                                                                                |
| <a href="#">_hsa:4725 NDUF55; NADH:ubiquinone oxidoreductase subunit S5</a>                                                                                |
| <a href="#">_hsa:5602 MAPK10; mitogen-activated protein kinase 10</a>                                                                                      |
| <a href="#">_hsa:873 CBR1; carbonyl reductase 1</a>                                                                                                        |
|                                                                                                                                                            |
|                                                                                                                                                            |
|                                                                                                                                                            |
|                                                                                                                                                            |
|                                                                                                                                                            |
| <b>ECM, FOCAL ADHESION AND CYTOSKELETON</b>                                                                                                                |
| <ul style="list-style-type: none"> <li>• <a href="#">_hsa04810</a> Regulation of actin cytoskeleton - Homo sapiens (human) (4)</li> </ul>                  |
| <a href="#">_hsa:1729 DIAPH1; diaphanous related formin 1</a>                                                                                              |
| <a href="#">_hsa:324 APC; APC regulator of WNT signaling pathway</a>                                                                                       |
| <a href="#">_hsa:3696 ITGB8; integrin subunit beta 8</a>                                                                                                   |
| <a href="#">_hsa:85477 SCIN; scinderin</a>                                                                                                                 |
| -                                                                                                                                                          |
| <ul style="list-style-type: none"> <li>• <a href="#">_hsa04530</a> Tight junction - Homo sapiens (human) (4)</li> </ul>                                    |
| <a href="#">_hsa:4301 AFDN; afadin, adherens junction formation factor</a>                                                                                 |
| <a href="#">_hsa:5602 MAPK10; mitogen-activated protein kinase 10</a>                                                                                      |
| <a href="#">_hsa:7846 TUBA1A; tubulin alpha 1a</a>                                                                                                         |

|                                                                                   |
|-----------------------------------------------------------------------------------|
| <a href="#">_hsa:375790 AGRN; agrin</a>                                           |
|                                                                                   |
| • <a href="#">hsa04510 Focal adhesion - Homo sapiens (human) (7)</a>              |
| <a href="#">_hsa:1282 COL4A1; collagen type IV alpha 1 chain</a>                  |
| <a href="#">_hsa:208 AKT2; AKT serine/threonine kinase 2</a>                      |
| <a href="#">_hsa:29780 PARVB; parvin beta</a>                                     |
| <a href="#">_hsa:3679 ITGA7; integrin subunit alpha 7</a>                         |
| <a href="#">_hsa:5499 PPP1CA; protein phosphatase 1 catalytic subunit alpha</a>   |
| <a href="#">_hsa:5908 RAP1B; RAP1B, member of RAS oncogene family</a>             |
| <a href="#">_hsa:673 BRAF; B-Raf proto-oncogene, serine/threonine kinase</a>      |
|                                                                                   |
| <b>LONG TERM POTENTIATION</b>                                                     |
| • <a href="#">hsa04720 Long-term potentiation - Homo sapiens (human) (4)</a>      |
| <a href="#">_hsa:3708 ITPR1; inositol 1,4,5-trisphosphate receptor type 1</a>     |
| <a href="#">_hsa:5499 PPP1CA; protein phosphatase 1 catalytic subunit alpha</a>   |
| <a href="#">_hsa:5908 RAP1B; RAP1B, member of RAS oncogene family</a>             |
| <a href="#">_hsa:673 BRAF; B-Raf proto-oncogene, serine/threonine kinase</a>      |
|                                                                                   |
| • <a href="#">hsa03013 Nucleocytoplasmic transport - Homo sapiens (human) (4)</a> |
| <a href="#">_hsa:23534 TNPO3; transportin 3</a>                                   |
| <a href="#">_hsa:30000 TNPO2; transportin 2</a>                                   |
| <a href="#">_hsa:4928 NUP98; nucleoporin 98 and 96 precursor</a>                  |
| <a href="#">_hsa:6613 SUMO2; small ubiquitin like modifier 2</a>                  |
|                                                                                   |
| <b>PLATELET ACTIVATION</b>                                                        |
| • <a href="#">hsa04611 Platelet activation - Homo sapiens (human) (6)</a>         |
| <a href="#">_hsa:208 AKT2; AKT serine/threonine kinase 2</a>                      |
| <a href="#">_hsa:2243 FGA; fibrinogen alpha chain</a>                             |
| <a href="#">_hsa:3708 ITPR1; inositol 1,4,5-trisphosphate receptor type 1</a>     |

|                                                                       |
|-----------------------------------------------------------------------|
| <a href="#">_hsa:84790 TUBA1C; tubulin alpha 1c</a>                   |
|                                                                       |
| • <a href="#">hsa04510 Focal adhesion - Homo sapiens (human) (4)</a>  |
| <a href="#">_hsa:1729 DIAPH1; diaphanous related formin 1</a>         |
| <a href="#">_hsa:3696 ITGB8; integrin subunit beta 8</a>              |
| <a href="#">_hsa:55742 PARVA; parvin alpha</a>                        |
| <a href="#">_hsa:5602 MAPK10; mitogen-activated protein kinase 10</a> |

|                                                                                 |
|---------------------------------------------------------------------------------|
| <a href="#">_hsa:5499 PPP1CA; protein phosphatase 1 catalytic subunit alpha</a> |
| <a href="#">_hsa:5908 RAP1B; RAP1B, member of RAS oncogene family</a>           |
| <a href="#">_hsa:8773 SNAP23; synaptosome associated protein 23</a>             |

**Table S7.** List of common and different proteins in NBW and LBW groups in response to an HFD.

Dark blue indicates common proteins; Light blue indicates common isoforms.

| NBW     | LBW     |                                                                                                                                                                                                                                                                                                                          |
|---------|---------|--------------------------------------------------------------------------------------------------------------------------------------------------------------------------------------------------------------------------------------------------------------------------------------------------------------------------|
|         |         |                                                                                                                                                                                                                                                                                                                          |
| ACAD10  | ACAD8   | AcylCoA dehydrogenase. ACAD10 is only active with R- and S-2-methyl-C15-CoA (uniprot). ACAD10 is Isobutyryl-CoA dehydrogenase and participates in valine catabolism                                                                                                                                                      |
| ACOX1   | ACTR1B  |                                                                                                                                                                                                                                                                                                                          |
| AGPS    | ADAM9   |                                                                                                                                                                                                                                                                                                                          |
|         | ADD3    |                                                                                                                                                                                                                                                                                                                          |
|         | AFDN    |                                                                                                                                                                                                                                                                                                                          |
| AGRN    | AGRN    | Agrin: isoform 2 is transmembrane form that is the predominate form in neurons of the brain, induces dendritic filopodia and synapse formation in mature hippocampal neurons in large part due to the attached glycosaminoglycan chains and the action of Rho-family GTPases. Isoform 1 is at the neuromuscular junction |
| AGRN    | AIMP1   |                                                                                                                                                                                                                                                                                                                          |
| AK2     | AKAP9   |                                                                                                                                                                                                                                                                                                                          |
| AKT2    | AKAP9   |                                                                                                                                                                                                                                                                                                                          |
| ALDH1A3 | ALDH7A1 | Aldehyde dehydrogenase 1: Cytosolic dehydrogenase that catalyzes the irreversible oxidation of a wide range of aldehydes to their corresponding carboxylic acid, important for retinoic acid. ALDH7: Oxidizes medium and long chain saturated and unsaturated aldehydes                                                  |
|         | ANKS1B  |                                                                                                                                                                                                                                                                                                                          |
|         | ANXA13  |                                                                                                                                                                                                                                                                                                                          |

|             |             |                                                                                                                                                                                                                                                                                                                                                                                       |
|-------------|-------------|---------------------------------------------------------------------------------------------------------------------------------------------------------------------------------------------------------------------------------------------------------------------------------------------------------------------------------------------------------------------------------------|
| AP3B1       | AP3S1       | AP3B1: AP-3 complex subunit beta-1. Subunit of non-clathrin- and clathrin-associated adaptor protein complex 3 (AP-3) that plays a role in protein sorting in the late-Golgi/trans-Golgi network (TGN) and/or endosomes. In concert with the BLOC-1 complex, AP-3 is required to target cargos into vesicles assembled at cell bodies for delivery into neurites and nerve terminals. |
|             |             | AP3S1: AP-3 complex subunit sigma-1. Part of the AP-3 complex, an adaptor-related complex which is not clathrin-associated. The complex is associated with the Golgi region as well as more peripheral structures. In concert with the BLOC-1 complex, AP-3 is required to target cargos into vesicles assembled at cell bodies for delivery into neurites and nerve terminals.       |
| APC         | APC         | Adenomatous polyposis coli protein. Promotes rapid degradation of CTNNB1 and participates in Wnt signaling as a negative regulator. It is required for the localization of MACF1 to the cell membrane and this localization of MACF1 is critical for its function in microtubule stabilization                                                                                        |
| APPL2       | APLP2       |                                                                                                                                                                                                                                                                                                                                                                                       |
| APRT        |             |                                                                                                                                                                                                                                                                                                                                                                                       |
| ARHGAP44    |             |                                                                                                                                                                                                                                                                                                                                                                                       |
| ARHGEF9     | ARHGEF9     | Rho guanine nucleotide exchange factor 9                                                                                                                                                                                                                                                                                                                                              |
| ARSA        | ARSB        | Arylsulfatase: Hydrolyzes cerebroside sulfate                                                                                                                                                                                                                                                                                                                                         |
|             | ARSD        |                                                                                                                                                                                                                                                                                                                                                                                       |
| ATE1        | ATE1        | Arginyl-tRNA--protein transferase 1: Involved in the post-translational conjugation of arginine to the N-terminal aspartate or glutamate of a protein                                                                                                                                                                                                                                 |
| ATG3        | ATP13A1     |                                                                                                                                                                                                                                                                                                                                                                                       |
| ATG4B       |             |                                                                                                                                                                                                                                                                                                                                                                                       |
| ATP2A1      | ATP2A1      | Sarcoplasmic/endoplasmic reticulum calcium ATPase 1: major Ca <sup>2+</sup> ATPase responsible for the reuptake of cytosolic Ca <sup>2+</sup> into the sarcoplasmic reticulum                                                                                                                                                                                                         |
|             | ATP2A1      |                                                                                                                                                                                                                                                                                                                                                                                       |
| ATP5PD      | ATPAF1      | ATP5PD: ATP synthase subunit d, mitochondrial                                                                                                                                                                                                                                                                                                                                         |
| BAG3        |             | ATPAF1: ATP synthase mitochondrial F1 complex assembly factor 1                                                                                                                                                                                                                                                                                                                       |
| BCLAF1      |             |                                                                                                                                                                                                                                                                                                                                                                                       |
| BRAF        |             |                                                                                                                                                                                                                                                                                                                                                                                       |
|             |             |                                                                                                                                                                                                                                                                                                                                                                                       |
| C10H10orf67 | C14H1orf198 | No identified orfs                                                                                                                                                                                                                                                                                                                                                                    |

|        |          |                                                                                                                                                                                                                                                                                                                |
|--------|----------|----------------------------------------------------------------------------------------------------------------------------------------------------------------------------------------------------------------------------------------------------------------------------------------------------------------|
| C2CD5  | C16orf70 |                                                                                                                                                                                                                                                                                                                |
| CA4    | CACNA1E  |                                                                                                                                                                                                                                                                                                                |
| CAMK1  | CALCR    |                                                                                                                                                                                                                                                                                                                |
| CASK   | CAPZB    |                                                                                                                                                                                                                                                                                                                |
| CAST   | CARS2    |                                                                                                                                                                                                                                                                                                                |
| CCP110 | CBR1     |                                                                                                                                                                                                                                                                                                                |
| CDK5   | CBS      |                                                                                                                                                                                                                                                                                                                |
|        | CC2D1A   |                                                                                                                                                                                                                                                                                                                |
|        | CCDC88A  |                                                                                                                                                                                                                                                                                                                |
|        | CCDC93   |                                                                                                                                                                                                                                                                                                                |
|        | CDIPT    |                                                                                                                                                                                                                                                                                                                |
|        | CDK16    |                                                                                                                                                                                                                                                                                                                |
| CELF2  | CELF2    | CUGBP Elav-like family member 2. RNA-binding protein implicated in the regulation of several post-transcriptional events. Involved in pre-mRNA alternative splicing, mRNA translation and stability                                                                                                            |
| CELSR2 | CEP170   |                                                                                                                                                                                                                                                                                                                |
| CFB    | CHMP2A   |                                                                                                                                                                                                                                                                                                                |
| CKMT2  | CHPT1    |                                                                                                                                                                                                                                                                                                                |
|        | CLCC1    |                                                                                                                                                                                                                                                                                                                |
| CLPB   | CLPB     | Chaperone protein ClpB (also caseinolytic peptidase B protein homolog). May function as a regulatory ATPase and be related to secretion/protein trafficking process                                                                                                                                            |
|        | CLPTM1   |                                                                                                                                                                                                                                                                                                                |
| COA1   | COA1     | Cytochrome c oxidase assembly factor 1 homolog: Component of the MITRAC (mitochondrial translation regulation assembly intermediate of cytochrome c oxidase complex) complex, that regulates cytochrome c oxidase assembly. Required for assembly of mitochondrial respiratory chain complex I and complex IV. |
| COL4A1 | COPS7B   | COP9 signalosome complex subunit 7b                                                                                                                                                                                                                                                                            |
| COPS8  | COPS8    | COP9 signalosome complex subunit 8: Component of the COP9 signalosome complex (CSN), a complex involved in various cellular and developmental processes. The CSN complex is an essential regulator of the ubiquitin (Ubl) conjugation pathway                                                                  |
| COPZ1  |          |                                                                                                                                                                                                                                                                                                                |

|         |        |                                                                                                                                                                                                                                                                                                                                                                                                                                                                                            |
|---------|--------|--------------------------------------------------------------------------------------------------------------------------------------------------------------------------------------------------------------------------------------------------------------------------------------------------------------------------------------------------------------------------------------------------------------------------------------------------------------------------------------------|
| COQ7    | COQ3   | COQ7: 5-demethoxyubiquinone hydroxylase, mitochondrial. Catalyzes the hydroxylation of 2-polyprenyl-3-methyl-6-methoxy-1,4-benzoquinol (DMQH2) during ubiquinone biosynthesis. Has also a structural role in the COQ enzyme complex                                                                                                                                                                                                                                                        |
| COX15   |        | COQ3: Ubiquinone biosynthesis O-methyltransferase, mitochondrial. O-methyltransferase that catalyzes the 2 O-methylation steps in the ubiquinone biosynthetic pathway                                                                                                                                                                                                                                                                                                                      |
| COX6B1  |        |                                                                                                                                                                                                                                                                                                                                                                                                                                                                                            |
| COX7A2  |        |                                                                                                                                                                                                                                                                                                                                                                                                                                                                                            |
| CRYZ    | CRYZL1 |                                                                                                                                                                                                                                                                                                                                                                                                                                                                                            |
| CSTB    |        | CRYZ: Quinone oxidoreductase; Orthoquinones, such as 1,2-naphthoquinone or 9,10-phenanthrenequinone, are the best substrates (in vitro). May act in the detoxification of xenobiotics. Interacts with (AU)-rich elements (ARE) in the 3'-UTR of target mRNA species. Enhances the stability of mRNA coding for BCL2                                                                                                                                                                        |
|         |        | CRYZL1: Quinone oxidoreductase-like protein 1                                                                                                                                                                                                                                                                                                                                                                                                                                              |
| CTTNBP2 | CTNND2 | CTTNBP2: CTTNBP2 N-terminal-like protein. Regulates lamellipodial actin dynamics in a CTTN-dependent manner. CTTN: Src substrate cortactin: through its interaction with CTTNBP2, involved in the regulation of neuronal spine density                                                                                                                                                                                                                                                     |
| DAAM2   |        | CTNND2: Catenin delta-2. Has a critical role in neuronal development, particularly in the formation and/or maintenance of dendritic spines and synapses                                                                                                                                                                                                                                                                                                                                    |
|         | CYCS   |                                                                                                                                                                                                                                                                                                                                                                                                                                                                                            |
|         |        |                                                                                                                                                                                                                                                                                                                                                                                                                                                                                            |
|         |        |                                                                                                                                                                                                                                                                                                                                                                                                                                                                                            |
| DCTN1   | DCTN1  | DCTN1: Dynactin subunit 1. Plays a key role in dynein-mediated retrograde transport of vesicles and organelles along microtubules by recruiting and tethering dynein to microtubules. Can regulate microtubule stability by promoting microtubule formation, nucleation and polymerization and by inhibiting microtubule catastrophe in neurons. Inhibits microtubule catastrophe by binding both to microtubules and to tubulin, leading to enhanced microtubule stability along the axon |
| DCTN2   | DCTN3  | DCTN2, DCTN3: Dynactin subunits 2 and 3                                                                                                                                                                                                                                                                                                                                                                                                                                                    |
| DDX17   | DDX5   | DDX17: Probable ATP-dependent RNA helicase DDX17. As an RNA helicase, unwinds RNA and alters RNA structures through ATP binding and hydrolysis. Involved in multiple cellular processes, including pre-mRNA splicing, alternative splicing, ribosomal RNA processing and miRNA processing, as well as transcription regulation. Regulates the alternative splicing of exons exhibiting specific features                                                                                   |



|        |        |                                                                                                                                                                                                                                                                                                                                                 |
|--------|--------|-------------------------------------------------------------------------------------------------------------------------------------------------------------------------------------------------------------------------------------------------------------------------------------------------------------------------------------------------|
|        | DDX58  | DDX5: Probable ATP-dependent RNA helicase DDX5. Involved in the alternative regulation of pre-mRNA splicing. its RNA helicase activity is necessary for increasing tau exon 10 inclusion and occurs in a RBM4-dependent manner.                                                                                                                 |
|        | DEPTOR |                                                                                                                                                                                                                                                                                                                                                 |
| DGKE   | DGKB   | DGKE: Diacylglycerol kinase epsilon. Membrane-bound diacylglycerol kinase that converts diacylglycerol/DAG into phosphatidic acid/phosphatidate/PA and regulates the respective levels of these two bioactive lipids                                                                                                                            |
|        |        | DGKB: Diacylglycerol kinase beta. Diacylglycerol kinase that converts diacylglycerol/DAG into phosphatidic acid/phosphatidate/PA and regulates the respective levels of these two bioactive lipids. Specifically expressed in brain, it regulates neuron-specific morphological changes including neurite branching and neurite spine formation |
|        | DIAPH1 |                                                                                                                                                                                                                                                                                                                                                 |
|        | DKK3   |                                                                                                                                                                                                                                                                                                                                                 |
| DNAJA4 | DNAJB2 | DnaJ homolog subfamily A member 4                                                                                                                                                                                                                                                                                                               |
|        |        | DnaJ homolog subfamily B member 2: Functions as a co-chaperone, regulating the substrate binding and activating the ATPase activity of chaperones of the HSP70/heat shock protein 70 family                                                                                                                                                     |
| DOCK8  | DOCK10 | DOCK8: Deducator of cytokinesis protein 8: Guanine nucleotide exchange factor (GEF) which specifically activates small GTPase CDC42 by exchanging bound GDP for free GTP                                                                                                                                                                        |
| DPP8   | DOCK9  | DOCK9: Deducator of cytokinesis protein 9. Guanine nucleotide-exchange factor (GEF) that activates CDC42 by exchanging bound GDP for free GTP. Overexpression induces filopodia formation                                                                                                                                                       |
| ELP1   |        | DOCK10: Deducator of cytokinesis protein 10. Guanine nucleotide-exchange factor (GEF) that activates CDC42 and RAC1 by exchanging bound GDP for free GTP. Essential for dendritic spine morphogenesis in Purkinje cells and in hippocampal neurons, via a CDC42-mediated pathway                                                                |
|        | DST    |                                                                                                                                                                                                                                                                                                                                                 |
|        | ECHDC1 |                                                                                                                                                                                                                                                                                                                                                 |
|        | EML1   |                                                                                                                                                                                                                                                                                                                                                 |
|        | ENAH   |                                                                                                                                                                                                                                                                                                                                                 |
|        |        |                                                                                                                                                                                                                                                                                                                                                 |
| ERBIN  | ERBIN  | Acts as an adapter for the receptor ERBB2, in epithelia. Involved in cytoskeleton organization and regulation of postsynaptic membrane neurotransmitter receptor levels                                                                                                                                                                         |
| ERMP1  | ERH    |                                                                                                                                                                                                                                                                                                                                                 |

|         |         |                                                                                                                                                                                                                                                                                                                                       |
|---------|---------|---------------------------------------------------------------------------------------------------------------------------------------------------------------------------------------------------------------------------------------------------------------------------------------------------------------------------------------|
| EXOC5   | EXOC5   | Exocyst complex component 5: Component of the exocyst complex involved in the docking of exocytic vesicles with fusion sites on the plasma membrane.                                                                                                                                                                                  |
|         | EXOC6B  |                                                                                                                                                                                                                                                                                                                                       |
| FAM120B | FAM169A | FAM120B: Constitutive coactivator of peroxisome proliferator-activated receptor gamma. Functions as a transactivator of PPARG and ESR1. Functions in adipogenesis through PPARG activation                                                                                                                                            |
| FARP1   | FASN    |                                                                                                                                                                                                                                                                                                                                       |
| FATP4   | FKBP15  | FAM169A: Soluble lamin-associated protein of 75 kDa                                                                                                                                                                                                                                                                                   |
| FBXL18  |         |                                                                                                                                                                                                                                                                                                                                       |
| FBXO21  |         |                                                                                                                                                                                                                                                                                                                                       |
| FGA     |         |                                                                                                                                                                                                                                                                                                                                       |
| FLII    |         |                                                                                                                                                                                                                                                                                                                                       |
| FMR1    | FMR1    | Synaptic functional regulator FMR1: Multifunctional polyribosome-associated RNA-binding protein that plays a central role in neuronal development and synaptic plasticity through the regulation of alternative mRNA splicing, mRNA stability, mRNA dendritic transport and postsynaptic local protein synthesis of a subset of mRNAs |
| FSIP2   | FSD1L   |                                                                                                                                                                                                                                                                                                                                       |
| FTH1    | FUCA1   |                                                                                                                                                                                                                                                                                                                                       |
| GLUD1   | GCSH    |                                                                                                                                                                                                                                                                                                                                       |
| GNS     | GFM2    |                                                                                                                                                                                                                                                                                                                                       |
|         | GFPT1   |                                                                                                                                                                                                                                                                                                                                       |
|         | GLRX    |                                                                                                                                                                                                                                                                                                                                       |
|         | GMPPA   |                                                                                                                                                                                                                                                                                                                                       |
|         | GNA15   |                                                                                                                                                                                                                                                                                                                                       |
| GOLGA2  | GOLGA2  | Golgin subfamily A member 2: Peripheral membrane component of the cis-Golgi stack that acts as a membrane skeleton that maintains the structure of the Golgi apparatus, and as a vesicle tether that facilitates vesicle fusion to the Golgi membrane                                                                                 |
| GOLGA3  | GOLGA3  |                                                                                                                                                                                                                                                                                                                                       |
| GSTP1   | GOSR2   | Golgin subfamily A member 3: probably involved in maintaining Golgi structure.                                                                                                                                                                                                                                                        |
|         | GRIA4   |                                                                                                                                                                                                                                                                                                                                       |
|         | HADHA   |                                                                                                                                                                                                                                                                                                                                       |

|          |         |                                                                                                                                                                                                                                                                                                                                |
|----------|---------|--------------------------------------------------------------------------------------------------------------------------------------------------------------------------------------------------------------------------------------------------------------------------------------------------------------------------------|
| HAPLN4   | HAPLN4  | Hyaluronan and proteoglycan link protein 4: Binds to hyaluronic acid and may be involved in formation of the extracellular matrix. Involved in central nervous system development                                                                                                                                              |
| HMGB2    |         |                                                                                                                                                                                                                                                                                                                                |
|          |         |                                                                                                                                                                                                                                                                                                                                |
| HNRNPA1  | HNRNPK  | HNRNPA1: Heterogeneous nuclear ribonucleoprotein A1. Involved in the packaging of pre-mRNA into hnRNP particles, transport of poly(A) mRNA from the nucleus to the cytoplasm and may modulate splice site selection                                                                                                            |
| HSD17B13 |         | HNRNPK: Heterogeneous nuclear ribonucleoprotein K. One of the major pre-mRNA-binding proteins. Binds tenaciously to poly(C) sequences. Likely to play a role in the nuclear metabolism of hnRNAs, particularly for pre-mRNAs that contain cytidine-rich sequences                                                              |
| HSPG2    | HSPG2   | Basement membrane-specific heparan sulfate proteoglycan core protein: Integral component of basement membranes                                                                                                                                                                                                                 |
| HTATSF1  |         |                                                                                                                                                                                                                                                                                                                                |
| IL17RE   |         |                                                                                                                                                                                                                                                                                                                                |
|          |         |                                                                                                                                                                                                                                                                                                                                |
| IQSEC3   | IQSEC2  | IQ motif and SEC7 domain-containing protein 3: Acts as a guanine nucleotide exchange factor (GEF) for ARF1.                                                                                                                                                                                                                    |
|          |         | IQ motif and SEC7 domain-containing protein 2: Is a guanine nucleotide exchange factor for the ARF GTP-binding proteins.                                                                                                                                                                                                       |
| ITGA7    | ITGB8   | ITGA7: Integrin alpha-7. Acts as Schwann cell receptor for laminin-2.                                                                                                                                                                                                                                                          |
|          |         | ITGB8: Integrin beta-8. is a receptor for fibronectin                                                                                                                                                                                                                                                                          |
| ITM2C    | ITM2C   | Integral membrane protein 2C: Negative regulator of amyloid-beta peptide production. May play a role in TNF-induced cell death and neuronal differentiation                                                                                                                                                                    |
| ITPR1    |         |                                                                                                                                                                                                                                                                                                                                |
| KARS1    | JPH3    |                                                                                                                                                                                                                                                                                                                                |
| KATNB1   | KHDRBS2 |                                                                                                                                                                                                                                                                                                                                |
| KCNMA1   | KHDRBS3 |                                                                                                                                                                                                                                                                                                                                |
|          |         |                                                                                                                                                                                                                                                                                                                                |
| KIF16B   | KIF16B  | Kinesin-like protein KIF16B: Plus end-directed microtubule-dependent motor protein involved in endosome transport and receptor recycling and degradation                                                                                                                                                                       |
| KYAT1    | KYAT1   | Kynurenine--oxoglutarate transaminase 1. Catalyzes the irreversible transamination of the L-tryptophan metabolite L-kynurenine to form kynurenic acid (KA), an intermediate in the tryptophan catabolic pathway which is also a broad spectrum antagonist of the three ionotropic excitatory amino acid receptors among others |

|              |              |                                                                                                                                                                                                                                                                                                                                                             |
|--------------|--------------|-------------------------------------------------------------------------------------------------------------------------------------------------------------------------------------------------------------------------------------------------------------------------------------------------------------------------------------------------------------|
| LAMP2        | LCMT1        |                                                                                                                                                                                                                                                                                                                                                             |
| LGALS8       | LGALS8       | Galectin-8: Beta-galactoside-binding lectin that acts as a sensor of membrane damage                                                                                                                                                                                                                                                                        |
|              | LIMCH1       |                                                                                                                                                                                                                                                                                                                                                             |
| LIN7C        | LIN7C        | Protein lin-7 homolog C: The tripartite complex composed of LIN7 (LIN7A, LIN7B or LIN7C), CASK and APBA1 associates with the motor protein KIF17 to transport vesicles containing N-methyl-D-aspartate (NMDA) receptor subunit NR2B along microtubules. This complex may have the potential to couple synaptic vesicle exocytosis to cell adhesion in brain |
|              | LMBRD1       |                                                                                                                                                                                                                                                                                                                                                             |
| LOC100523668 | LOC100523668 | GB1/RHD3-type G domain-containing protein. GTP binding                                                                                                                                                                                                                                                                                                      |
| MACROD1      | LRRC7        |                                                                                                                                                                                                                                                                                                                                                             |
| MAP2K3       | MAPK10       |                                                                                                                                                                                                                                                                                                                                                             |
| MCTP1        | MAT2B        |                                                                                                                                                                                                                                                                                                                                                             |
| METAP2       | MT2A         |                                                                                                                                                                                                                                                                                                                                                             |
| METTL22      | MTMR9        |                                                                                                                                                                                                                                                                                                                                                             |
| METTL7A      | MTSS2        |                                                                                                                                                                                                                                                                                                                                                             |
| MICAL3       |              |                                                                                                                                                                                                                                                                                                                                                             |
| MMS19        |              |                                                                                                                                                                                                                                                                                                                                                             |
| MON2         |              |                                                                                                                                                                                                                                                                                                                                                             |
| MVD          |              |                                                                                                                                                                                                                                                                                                                                                             |
| MX2          |              |                                                                                                                                                                                                                                                                                                                                                             |
|              |              |                                                                                                                                                                                                                                                                                                                                                             |
| MYBBP1A      | MYBBP1A      | Myb-binding protein 1A. May activate or repress transcription via interactions with sequence specific DNA-binding proteins. Has a role in rRNA biogenesis together with PWP1                                                                                                                                                                                |
| MYEF2        |              |                                                                                                                                                                                                                                                                                                                                                             |
| NADH1        | NADH1        | NADH-ubiquinone oxidoreductase chain 1. Core subunit of the mitochondrial membrane respiratory chain NADH dehydrogenase (Complex I) which catalyzes electron transfer from NADH through the respiratory chain, using ubiquinone as an electron acceptor                                                                                                     |
| NDE1         |              |                                                                                                                                                                                                                                                                                                                                                             |

|        |        |                                                                                                                                                                                                                                                                                                                                                                                                                                                                                                                                                 |
|--------|--------|-------------------------------------------------------------------------------------------------------------------------------------------------------------------------------------------------------------------------------------------------------------------------------------------------------------------------------------------------------------------------------------------------------------------------------------------------------------------------------------------------------------------------------------------------|
| NDUFS5 | NDUFS5 | NADH dehydrogenase [ubiquinone] iron-sulfur protein 5. Accessory subunit of the mitochondrial membrane respiratory chain NADH dehydrogenase (Complex I), that is believed not to be involved in catalysis. Complex I functions in the transfer of electrons from NADH to the respiratory chain. The immediate electron acceptor for the enzyme is believed to be ubiquinone.                                                                                                                                                                    |
| NEB    |        |                                                                                                                                                                                                                                                                                                                                                                                                                                                                                                                                                 |
| NEBL   |        |                                                                                                                                                                                                                                                                                                                                                                                                                                                                                                                                                 |
| NEDD4  |        |                                                                                                                                                                                                                                                                                                                                                                                                                                                                                                                                                 |
| NEDD4L | NEDD4L | E3 ubiquitin-protein ligase NEDD4-like: E3 ubiquitin-protein ligase which accepts ubiquitin from an E2 ubiquitin-conjugating enzyme in the form of a thioester and then directly transfers the ubiquitin to targeted substrates. promotes ubiquitination and internalization of various plasma membrane channels. Involved in the regulation of TOR signaling                                                                                                                                                                                   |
| NF1    |        |                                                                                                                                                                                                                                                                                                                                                                                                                                                                                                                                                 |
| NLGN4X |        |                                                                                                                                                                                                                                                                                                                                                                                                                                                                                                                                                 |
| NPC2   |        |                                                                                                                                                                                                                                                                                                                                                                                                                                                                                                                                                 |
| NPLOC4 | NPLOC4 | Nuclear protein localization protein 4 homolog. The ternary complex containing UFD1, VCP and NPLOC4 binds ubiquitinated proteins and is necessary for the export of misfolded proteins from the ER to the cytoplasm, where they are degraded by the proteasome                                                                                                                                                                                                                                                                                  |
| NRXN1  |        |                                                                                                                                                                                                                                                                                                                                                                                                                                                                                                                                                 |
| NUP98  |        |                                                                                                                                                                                                                                                                                                                                                                                                                                                                                                                                                 |
| OPCML  | OCIAD2 |                                                                                                                                                                                                                                                                                                                                                                                                                                                                                                                                                 |
| PAM16  | PAICS  | <p>PARVA: Alpha-parvin. Plays a role in the reorganization of the actin cytoskeleton, formation of lamellipodia and ciliogenesis. Plays a role in the establishment of cell polarity, cell adhesion, cell spreading, and directed cell migration.</p> <p>PARVB: Beta-parvin. Adapter protein that plays a role in integrin signaling via ILK and in activation of the GTPases CDC42 and RAC1 by guanine exchange factors. Plays a role in cell adhesion, cell spreading, establishment or maintenance of cell polarity, and cell migration.</p> |
| PARVB  | PARVA  |                                                                                                                                                                                                                                                                                                                                                                                                                                                                                                                                                 |
| PCDH7  |        |                                                                                                                                                                                                                                                                                                                                                                                                                                                                                                                                                 |
| PDIA4  | PDCD5  |                                                                                                                                                                                                                                                                                                                                                                                                                                                                                                                                                 |
| PDXDC1 | PDE4B  |                                                                                                                                                                                                                                                                                                                                                                                                                                                                                                                                                 |
| PIN1   | PDK2   |                                                                                                                                                                                                                                                                                                                                                                                                                                                                                                                                                 |
| PKM    | PDLIM5 |                                                                                                                                                                                                                                                                                                                                                                                                                                                                                                                                                 |
|        | PDXDC1 |                                                                                                                                                                                                                                                                                                                                                                                                                                                                                                                                                 |
|        |        |                                                                                                                                                                                                                                                                                                                                                                                                                                                                                                                                                 |
|        |        |                                                                                                                                                                                                                                                                                                                                                                                                                                                                                                                                                 |

|         |          |                                                                                                                                                                                                                                                                       |
|---------|----------|-----------------------------------------------------------------------------------------------------------------------------------------------------------------------------------------------------------------------------------------------------------------------|
|         | PIGS     |                                                                                                                                                                                                                                                                       |
|         | PIK3C3   |                                                                                                                                                                                                                                                                       |
|         | PIK3R4   |                                                                                                                                                                                                                                                                       |
| PKP4    | PKP4     | Plakophilin-4: Plays a role as a regulator of Rho activity during cytokinesis. May play a role in junctional plaques.                                                                                                                                                 |
| PLCH1   | PLCH1    | 1-phosphatidylinositol 4,5-bisphosphate phosphodiesterase eta-1. The production of the second messenger molecules diacylglycerol (DAG) and inositol 1,4,5-trisphosphate (IP3) is mediated by calcium-activated phosphatidylinositol-specific phospholipase C enzymes  |
| PLEKHB1 | PLS1     |                                                                                                                                                                                                                                                                       |
|         | PMM1     |                                                                                                                                                                                                                                                                       |
| PODN    | PODN     | Podocan: Negatively regulates cell proliferation and cell migration.                                                                                                                                                                                                  |
| PPP1CA  | PPIF     |                                                                                                                                                                                                                                                                       |
| PPP6R1  | PPP6R1   | Serine/threonine-protein phosphatase 6 regulatory subunit 1. Regulatory subunit of protein phosphatase 6 (PP6). May function as a scaffolding PP6 subunit. Involved in the PP6-mediated dephosphorylation of NFKBIE opposing its degradation in response to TNF-alpha |
| PRKAR1B | PPT1     |                                                                                                                                                                                                                                                                       |
| PRPSAP2 | PRUNE2   |                                                                                                                                                                                                                                                                       |
|         |          |                                                                                                                                                                                                                                                                       |
| PSMA1   | PSMB4    | Proteasome subunit alpha 1: Component of the proteasome core, a large protease complex with broad specificity involved in protein degradation.                                                                                                                        |
| PSMB6   |          | Proteasome subunit beta type-4: Non-catalytic component of the 20S core proteasome complex involved in the proteolytic degradation of most intracellular proteins                                                                                                     |
| PTBP1   | PTBP1    | Proteasome subunit beta type-6                                                                                                                                                                                                                                        |
| PTPRF   | PTK2     |                                                                                                                                                                                                                                                                       |
| RAB24   | RABGAP1L | RABGAP1L: Rab GTPase-activating protein 1-like. Plays a role in endocytosis and intracellular protein transport.                                                                                                                                                      |
| RAB3B   | RABL6    | RAB24: Ras-related protein Rab-24. May be involved in autophagy-related processes.                                                                                                                                                                                    |
| RAP1B   | RBM8A    | RABL6: Rab-like protein 6. May enhance cellular proliferation                                                                                                                                                                                                         |
| RCSD1   |          | RAB3B: Ras-related protein Rab-3B. Protein transport. Probably involved in vesicular traffic                                                                                                                                                                          |
|         |          | RAP1B: Ras-related protein Rap-1b. GTP-binding protein that possesses intrinsic GTPase activity                                                                                                                                                                       |
| RHEB    | RHEB     | GTP-binding protein Rheb. Activates the protein kinase activity of mTORC1, and thereby plays a role in the regulation of apoptosis. Stimulates the phosphorylation of S6K1 and EIF4EBP1 through activation of mTORC1 signaling                                        |

|         |          |                                                                                                                                                                                                                                                                                                                         |
|---------|----------|-------------------------------------------------------------------------------------------------------------------------------------------------------------------------------------------------------------------------------------------------------------------------------------------------------------------------|
| RPL17   | RNF123   |                                                                                                                                                                                                                                                                                                                         |
| RPS18   | RPS6KA3  |                                                                                                                                                                                                                                                                                                                         |
| RPS19   | RPTOR    |                                                                                                                                                                                                                                                                                                                         |
| SAG     | RSU1     |                                                                                                                                                                                                                                                                                                                         |
|         | RTN3     |                                                                                                                                                                                                                                                                                                                         |
|         | RTN4IP1  |                                                                                                                                                                                                                                                                                                                         |
|         | S100A2   |                                                                                                                                                                                                                                                                                                                         |
|         | SAE1     |                                                                                                                                                                                                                                                                                                                         |
| SCCPDH  | SCCPDH   | Saccharopine dehydrogenase-like oxidoreductase. glycolipid biosynthetic process                                                                                                                                                                                                                                         |
|         | SCIN     |                                                                                                                                                                                                                                                                                                                         |
| SCN9A   | SCN8A    | SCN9A: Sodium channel protein type 9 subunit alpha. Mediates the voltage-dependent sodium ion permeability of excitable membranes.                                                                                                                                                                                      |
|         | SCRN3    | SCN8A: Sodium channel protein type 8 subunit alpha. Mediates the voltage-dependent sodium ion permeability of excitable membranes                                                                                                                                                                                       |
| SCYL2   | SCYL2    | SCY1-like protein 2. Component of the AP2-containing clathrin coat that may regulate clathrin-dependent trafficking at plasma membrane, TGN and endosomal system. By regulating the expression of excitatory receptors at synapses, plays an essential role in neuronal function and signaling and in brain development |
| SEC63   | SEC61B   | SEC63: Translocation protein SEC63. Mediates cotranslational and post-translational transport of certain precursor polypeptides across endoplasmic reticulum                                                                                                                                                            |
| SH3GLB2 | SEC62    | SEC61B: Protein transport protein Sec61 subunit beta. Component of SEC61 channel-forming translocon complex that mediates transport of signal peptide-containing precursor polypeptides across the endoplasmic reticulum                                                                                                |
|         |          | SEC62: Translocation protein SEC62. Mediates post-translational transport of precursor polypeptides across endoplasmic reticulum                                                                                                                                                                                        |
|         | SERPINA1 |                                                                                                                                                                                                                                                                                                                         |
|         | SETD3    |                                                                                                                                                                                                                                                                                                                         |
|         | SIRT5    |                                                                                                                                                                                                                                                                                                                         |
| SLA-2   | SLA-1    | SLA: Sus scrofa HLA family                                                                                                                                                                                                                                                                                              |
| SLA-3   | SLA-2    |                                                                                                                                                                                                                                                                                                                         |
| SLA-6   | SLA-3    |                                                                                                                                                                                                                                                                                                                         |
| SLA-B   | SLA-6    |                                                                                                                                                                                                                                                                                                                         |

|         |         |                                                                                                                                                                                                                                                              |
|---------|---------|--------------------------------------------------------------------------------------------------------------------------------------------------------------------------------------------------------------------------------------------------------------|
| SLC27A4 | SLC7A10 | SLC27A4: Long-chain fatty acid transport protein 4. Involved in translocation of long-chain fatty acids (LFCA) across the plasma membrane                                                                                                                    |
| SLC4A7  |         | SLC7A10: Asc-type amino acid transporter 1. Sodium-independent, high affinity transport of small neutral D- and L-amino acids. May play a role in the modulation of glutamatergic transmission through mobilization of D-serine at the glutamatergic synapse |
| SNAP23  | SMARCC1 | SLC4A7: Sodium bicarbonate cotransporter 3. Electroneutral sodium- and bicarbonate-dependent cotransporter                                                                                                                                                   |
|         | SMYD5   |                                                                                                                                                                                                                                                              |
| SNX1    | SNX1    | Sorting nexin-1. Involved in several stages of intracellular trafficking. Interacts with membranes containing phosphatidylinositol 3-phosphate (PtdIns(3P)) or phosphatidylinositol 3,5-bisphosphate                                                         |
| SPAG9   | SORL1   |                                                                                                                                                                                                                                                              |
| SPARC   | SORT1   |                                                                                                                                                                                                                                                              |
| SPARCL1 |         |                                                                                                                                                                                                                                                              |
| SPEF2   |         |                                                                                                                                                                                                                                                              |
| SRSF1   | SRSF4   | SRSF1: Serine/arginine-rich splicing factor 1. Plays a role in preventing exon skipping, ensuring the accuracy of splicing and regulating alternative splicing                                                                                               |
| STIP1   | SRSF6   | SRSF4: Serine/arginine-rich splicing factor 4. Plays a role in alternative splice site selection during pre-mRNA splicing                                                                                                                                    |
| STRBP   |         | SRSF6: Serine/arginine-rich splicing factor 6. Plays a role in constitutive splicing and modulates the selection of alternative splice sites. Plays a role in the alternative splicing of MAPT/Tau exon 10                                                   |
| STT3B   | SUGP2   |                                                                                                                                                                                                                                                              |
| SUGP2   |         |                                                                                                                                                                                                                                                              |
| SUMO2   |         |                                                                                                                                                                                                                                                              |
|         |         |                                                                                                                                                                                                                                                              |
|         |         |                                                                                                                                                                                                                                                              |
| SYNE1   | SYN3    | SYNE1: Nesprin-1. Multi-isomeric modular protein which forms a linking network between organelles and the actin cytoskeleton to maintain the subcellular spatial organization.                                                                               |
|         |         | SYN3: Synapsin-3. May be involved in the regulation of neurotransmitter release and synaptogenesis.                                                                                                                                                          |
| SYT3    | SYT3    | Synaptotagmin-3. Ca <sup>2+</sup> sensor involved in Ca <sup>2+</sup> -dependent exocytosis of secretory vesicles through Ca <sup>2+</sup> and phospholipid binding to the C2 domain.                                                                        |
|         | TKFC    |                                                                                                                                                                                                                                                              |



|         |           |                                                                                                                                                                                                                                                                                                                                                                                                                                |
|---------|-----------|--------------------------------------------------------------------------------------------------------------------------------------------------------------------------------------------------------------------------------------------------------------------------------------------------------------------------------------------------------------------------------------------------------------------------------|
|         | TMED9     |                                                                                                                                                                                                                                                                                                                                                                                                                                |
| TMEM263 | TMEM245   | TMEM263: Transmembrane protein 263. No information                                                                                                                                                                                                                                                                                                                                                                             |
|         |           | TMEM245: Transmembrane protein 245. No information                                                                                                                                                                                                                                                                                                                                                                             |
| TNPO2   | TMPRSS11A |                                                                                                                                                                                                                                                                                                                                                                                                                                |
| TNPO3   | TMPRSS13  |                                                                                                                                                                                                                                                                                                                                                                                                                                |
|         | TMX4      |                                                                                                                                                                                                                                                                                                                                                                                                                                |
|         | TOMM40    |                                                                                                                                                                                                                                                                                                                                                                                                                                |
|         | TPM1      |                                                                                                                                                                                                                                                                                                                                                                                                                                |
|         | TPRG1L    |                                                                                                                                                                                                                                                                                                                                                                                                                                |
|         | TRA2B     |                                                                                                                                                                                                                                                                                                                                                                                                                                |
|         | TRAPPC9   |                                                                                                                                                                                                                                                                                                                                                                                                                                |
|         | TRIM9     |                                                                                                                                                                                                                                                                                                                                                                                                                                |
|         | TRIP11    |                                                                                                                                                                                                                                                                                                                                                                                                                                |
|         | TSC22D3   |                                                                                                                                                                                                                                                                                                                                                                                                                                |
|         | TUBA1A    |                                                                                                                                                                                                                                                                                                                                                                                                                                |
|         | TUBA1C    |                                                                                                                                                                                                                                                                                                                                                                                                                                |
|         | TXNRD2    |                                                                                                                                                                                                                                                                                                                                                                                                                                |
| UQCRC2  | U2AF2     |                                                                                                                                                                                                                                                                                                                                                                                                                                |
|         | UCKL1     |                                                                                                                                                                                                                                                                                                                                                                                                                                |
|         | UFD1      |                                                                                                                                                                                                                                                                                                                                                                                                                                |
|         | UTRN      |                                                                                                                                                                                                                                                                                                                                                                                                                                |
|         | VPS52     |                                                                                                                                                                                                                                                                                                                                                                                                                                |
|         | WDR13     | WD repeat-containing protein 13: no information                                                                                                                                                                                                                                                                                                                                                                                |
| WDR45   | WDR45     | WD repeat domain phosphoinositide-interacting protein 3. Component of the autophagy machinery that controls the major intracellular degradation process by which cytoplasmic materials are packaged into autophagosomes and delivered to lysosomes for degradation. In the cellular response to starvation, may also function together with the TSC1-TSC2 complex and RB1CC1 in the inhibition of the mTORC1 signaling pathway |
| ZFYVE1  | ZADH2     |                                                                                                                                                                                                                                                                                                                                                                                                                                |
